# Supplementary material for: Plazas del Dos de Mayo, Mayor y de la Paja: Rehabilitaciones preferentes
Source: Royal Society of Chemistry journal article supplement (doi:10.1039/d4sc02998d), 1996-01-01
Supplement: d4sc02998d1.pdf [file d4sc02998d1.pdf]

# Palladium-catalyzed decarboxylative (4+3) cycloadditions of bicyclobutanes with 2-alkylidenetrimethylene carbonates for the synthesis of 2-oxabicyclo[4.1.1]octanes

Xin-Yu Gao,<sup>a</sup> Lei Tang,<sup>a</sup> Xu Zhang,<sup>b</sup> and Jian-Jun Feng<sup>\*a</sup>

<sup>a</sup>State Key Laboratory of Chemo/Biosensing and Chemometrics, Advanced Catalytic Engineering Research Center of the Ministry of Education, College of Chemistry and Chemical Engineering, Hunan University, Changsha, Hunan 410082, P. R. China

<sup>b</sup>School of Chemistry & Chemical Engineering, Yangzhou University, Yangzhou, 225002, P.R. China

jianjunfeng@hnu.edu.cn

## Supporting Information

### Table of Contents

|    |                                                                                                          |     |
|----|----------------------------------------------------------------------------------------------------------|-----|
| 1  | General Information .....                                                                                | S2  |
| 2  | Optimization Study.....                                                                                  | S3  |
| 3  | General Procedure for the (4+3) Cycloadditions of BCBs <b>1</b> and ADTMC <b>2a</b> ( <b>GP1</b> ) ..... | S7  |
| 4  | General Procedure for the (4+3) Cycloadditions of BCBs and substituted ADTMCs ( <b>GP2</b> ).....        | S8  |
| 5  | Scale-Up Experiment.....                                                                                 | S8  |
| 6  | Synthetic Transformations .....                                                                          | S9  |
| 7  | Sensitivity Assessment .....                                                                             | S11 |
| 8  | Unsuccessful Substrates.....                                                                             | S13 |
| 9  | Characterization Data of the Products .....                                                              | S14 |
| 10 | Crystal Structure of <b>3ab</b> .....                                                                    | S37 |
| 11 | NMR Spectra .....                                                                                        | S39 |
| 12 | References .....                                                                                         | S68 |

## 1 General Information

All reactions were performed in flame-dried glassware using conventional Schlenk techniques under a static pressure of nitrogen unless otherwise stated. Liquids and solutions were transferred with syringes. Bicyclo[1.1.0]butanes (BCBs)<sup>[1]</sup> and 2-alkylidenetrimethylene carbonates (ADTMCs)<sup>[2]</sup> were prepared according to reported procedures. Pd<sub>2</sub>(dba)<sub>3</sub>·CHCl<sub>3</sub> (98%, *Energy Chemical* and other commercially available reagents were purchased from *Sigma-Adrich*, *Leyan*, *Energy Chemical* and *Bide Chemical Company* and used as received.) 1,4-dioxane was purchased from *Energy Chemical* (99%, Extra Dry) and used as received. All other solvents (CH<sub>3</sub>CN, THF, toluene and 1,2-dichloroethane *etc.*) were dried and purified following standard procedures. Technical grade solvents for extraction or chromatography (Petroleum ether, CH<sub>2</sub>Cl<sub>2</sub>, and ethyl acetate) were distilled prior to use. Analytical thin layer chromatography (TLC) was performed on silica gel 60 F254 glass plates by *Merck*. Flash column chromatography was performed on silica gel 60 (40–63 μm, 230–400 mesh, ASTM) by *Grace* using the indicated solvents. <sup>1</sup>H, <sup>13</sup>C NMR spectra were recorded in CDCl<sub>3</sub> on Bruker AV400 or 600 instruments. Chemical shifts are reported in parts per million (ppm) and are referenced to the residual solvent resonance as the internal standard (CDCl<sub>3</sub>: δ = 7.26 ppm for <sup>1</sup>H NMR and CDCl<sub>3</sub>: δ = 77.0 ppm for <sup>13</sup>C NMR). Data are reported as follows: chemical shift, multiplicity (s = singlet, d = doublet, t = triplet, q = quartet, m = multiplet), coupling constants (Hz), and integration. The full-scan mass spectra were taken on a hybrid quadrupole-orbitrap mass spectrometer equipped with a heated electrospray ionization source (ThermoFischer Scientific, Bremen, Germany). The configuration was determined by single crystal X-ray diffraction analysis on Bruker D8 Venture dual system with a Cu micro-focus source. Acknowledgement: the <sup>1</sup>H, <sup>13</sup>C NMR spectra, single crystal X-ray diffraction and HRMS (ESI) were performed at Analytical Instrumentation Center of Hunan University.

## 2 Optimization Study

**Table S1. Screening of ligand and solvent for the (4+3) cycloaddition of BCB 1a and ADTMC 2a<sup>[a]</sup>**

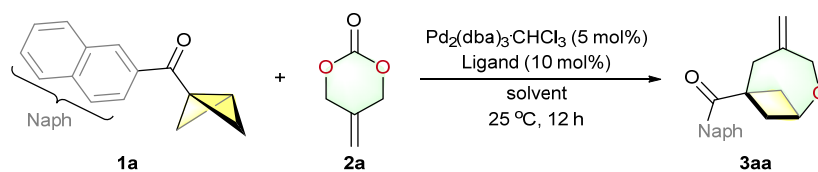

| Entry     | Ligand    | Solvent                         | Conversion of 1a [%] <sup>[b]</sup> | Conversion of 2a [%] <sup>[b]</sup> | Yield of 3aa [%] <sup>[b]</sup> |
|-----------|-----------|---------------------------------|-------------------------------------|-------------------------------------|---------------------------------|
| 1         | L1        | toluene                         | 36                                  | 100                                 | 0                               |
| 2         | L2        | toluene                         | <5                                  | 100                                 | 0                               |
| 3         | L3        | toluene                         | 34                                  | 100                                 | 0                               |
| 4         | L4        | toluene                         | 42                                  | 100                                 | 11                              |
| 5         | L5        | toluene                         | 58                                  | 100                                 | 14                              |
| 6         | L6        | toluene                         | 44                                  | 100                                 | 0                               |
| 7         | L7        | toluene                         | 50                                  | 100                                 | 0                               |
| 8         | L8        | toluene                         | 10                                  | 100                                 | 0                               |
| <b>9</b>  | <b>L9</b> | <b>toluene</b>                  | <b>66</b>                           | <b>100</b>                          | <b>49</b>                       |
| 10        | L10       | toluene                         | 8                                   | 73                                  | 0                               |
| 11        | L11       | toluene                         | 15                                  | 100                                 | 0                               |
| 12        | L12       | toluene                         | 35                                  | 100                                 | 0                               |
| 13        | L13       | toluene                         | 32                                  | 100                                 | 0                               |
| 14        | L14       | toluene                         | 16                                  | 75                                  | 0                               |
| 15        | L15       | toluene                         | 25                                  | 100                                 | 0                               |
| 16        | L16       | toluene                         | 24                                  | 100                                 | 0                               |
| 17        | L17       | toluene                         | 20                                  | 100                                 | 0                               |
| 18        | L9        | PhCl                            | 75                                  | 100                                 | 40                              |
| 19        | L9        | CH <sub>2</sub> Cl <sub>2</sub> | 30                                  | 100                                 | 10                              |
| 20        | L9        | EtOAc                           | 64                                  | 100                                 | 53                              |
| 21        | L9        | CH <sub>3</sub> CN              | 32                                  | 97                                  | 7                               |
| 22        | L9        | THF                             | 85                                  | 100                                 | 71                              |
| <b>23</b> | <b>L9</b> | <b>1,4-dioxane</b>              | <b>&gt;99</b>                       | <b>100</b>                          | <b>96</b>                       |
| 24        | L9        | HFIP                            | 38                                  | 12                                  | 0                               |

[a] Reaction conditions: **1a** (0.10 mmol), **2a** (0.12 mmol), Pd<sub>2</sub>(dba)<sub>3</sub>·CHCl<sub>3</sub> (5 mol%) and ligand (10 mol%), solvent (2 mL), 25 °C, under N<sub>2</sub> for 12 h. [b] Determined by <sup>1</sup>H NMR analysis using CH<sub>2</sub>Br<sub>2</sub> as the internal reference. HFIP = Hexafluoroisopropanol.

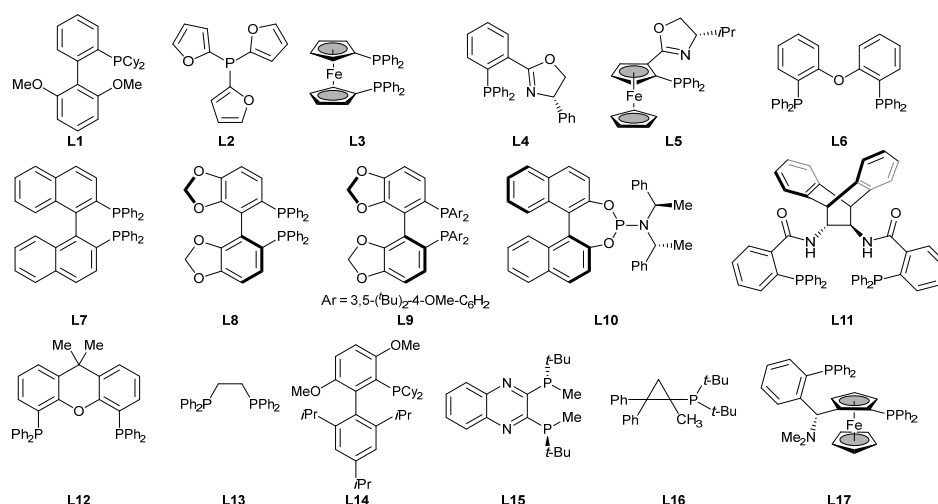

The primary side reaction in the present decarboxylative (4+3) cycloadditions of BCBs is the rapid decomposition of 2-alkylidenetri-methylene carbonates (ADTMCs). Ligands like **L4**, **L7**, **L8**, and **L10** have been identified as effective for the palladium-catalyzed decarboxylative cycloadditions of ADTMCs (ref 29j: *Angew. Chem. Int. Ed.*, **2020**, *59*, 11316; ref 29b: *Org. Lett.*, **2023**, *25*, 5011 in the main text). However, these ligands yielded unsatisfactory results in the current decarboxylative (4+3) cycloadditions of BCBs. These results suggest that the benefits of employing DTBM-Segphos **L9** may stem from the formation of a relatively stable intermediate **int-II**, preventing its rapid decomposition, and promoting subsequent reactions (Scheme 5 in the main text) through steric hindrance or dispersion interactions.

In 2013, the Wanbin Zhang group reported the asymmetric hydrogenation of  $\alpha$ -acyloxy-1-arylethanones using Pd and DTBM-Segphos as the catalyst (*Angew. Chem. Int. Ed.* **2013**, *52*, 11632). Unlike SegPHOS **L8**, which did not yield the desired products, the use of DTBM-Segphos **L9** as the ligand resulted in the formation of the desired products with high yield and excellent ee. The DFT results demonstrated that an extensive network of C-H ... H-C interactions provided by the heavily substituted phenyl rings of DTBM-SegPHOS leads to increased stabilities of all intermediates and transition states in the corresponding catalytic cycles compared with the unsubstituted analogues (K. N. Houk, *et al. Org. Chem. Front.*, **2023**, *10*, 3485; I. D. Gridnev, *et al. iScience* **2020**, *23*, 100960).

Due to the formation of 1,4-O/C dipole species **int-II** in the reaction, a polar solvent may serve as a stabilizing agent for this intermediate. The use of CH<sub>2</sub>Cl<sub>2</sub> resulted in a low yield of product **3aa** (Table S1, entry 19), whereas an O-containing polar solvent such as EtOAc, THF and 1,4-dioxane led to a higher yield of **3aa** (Table S1, entries 20, 22-23). Oxygen atoms in the solvent could coordinate with the palladium catalyst to enhance the reaction.

**Table S2. Screening of ligand and solvent for the (4+3) cycloaddition of BCB 1a and ADTMC 2b<sup>[a]</sup>**

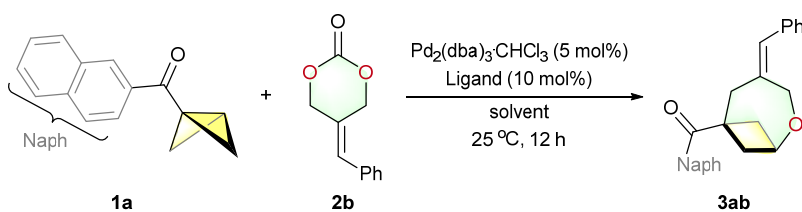

| Entry    | Ligand     | Solvent            | Conversion of <b>1a</b> [%] <sup>[b]</sup> | Conversion of <b>2b</b> [%] <sup>[b]</sup> | Yield of <b>3ab</b> [%] <sup>[b]</sup> |
|----------|------------|--------------------|--------------------------------------------|--------------------------------------------|----------------------------------------|
| 1        | <b>L1</b>  | 1,4-dioxane        | 36                                         | 70                                         | 12                                     |
| 2        | <b>L2</b>  | 1,4-dioxane        | 15                                         | 34                                         | 0                                      |
| 3        | <b>L3</b>  | 1,4-dioxane        | 15                                         | 44                                         | 0                                      |
| 4        | <b>L4</b>  | 1,4-dioxane        | 34                                         | 18                                         | 4                                      |
| 5        | <b>L5</b>  | 1,4-dioxane        | 51                                         | 28                                         | 14                                     |
| <b>6</b> | <b>L6</b>  | <b>1,4-dioxane</b> | <b>71</b>                                  | <b>95</b>                                  | <b>19</b>                              |
| 7        | <b>L7</b>  | 1,4-dioxane        | 37                                         | 84                                         | 4                                      |
| 8        | <b>L8</b>  | 1,4-dioxane        | 16                                         | 89                                         | <3                                     |
| 9        | <b>L9</b>  | 1,4-dioxane        | 42                                         | 100                                        | 13                                     |
| 10       | <b>L10</b> | 1,4-dioxane        | 8                                          | <5                                         | <5                                     |
| 11       | <b>L11</b> | 1,4-dioxane        | 28                                         | 42                                         | 0                                      |
| 12       | <b>L12</b> | 1,4-dioxane        | 20                                         | 90                                         | <5                                     |
| 13       | <b>L13</b> | 1,4-dioxane        | 55                                         | 56                                         | 9                                      |
| 14       | <b>L14</b> | 1,4-dioxane        | 19                                         | 13                                         | 6                                      |
| 15       | <b>L15</b> | 1,4-dioxane        | 34                                         | 53                                         | 7                                      |
| 16       | <b>L16</b> | 1,4-dioxane        | 25                                         | 71                                         | 4                                      |
| 17       | <b>L17</b> | 1,4-dioxane        | 36                                         | 90                                         | 14                                     |
| 18       | <b>L18</b> | 1,4-dioxane        | 45                                         | 86                                         | 15                                     |

|    |            |                                 |    |     |    |
|----|------------|---------------------------------|----|-----|----|
| 19 | <b>L19</b> | 1,4-dioxane                     | 26 | 54  | 0  |
| 20 | <b>L20</b> | 1,4-dioxane                     | 25 | 51  | <5 |
| 21 | <b>L21</b> | 1,4-dioxane                     | 23 | 100 | 0  |
| 22 | <b>L22</b> | 1,4-dioxane                     | 17 | 100 | 0  |
| 23 | <b>L23</b> | 1,4-dioxane                     | 64 | 97  | 0  |
| 24 | <b>L24</b> | 1,4-dioxane                     | 17 | 24  | 2  |
| 25 | <b>L25</b> | 1,4-dioxane                     | 60 | 100 | 7  |
| 26 | <b>L26</b> | 1,4-dioxane                     | 60 | 91  | 10 |
| 27 | <b>L27</b> | 1,4-dioxane                     | 46 | 82  | 8  |
| 28 | <b>L6</b>  | THF                             | 47 | 88  | 13 |
| 29 | <b>L6</b>  | toluene                         | 45 | 96  | 10 |
| 30 | <b>L6</b>  | CH <sub>2</sub> Cl <sub>2</sub> | 35 | 93  | 7  |
| 31 | <b>L6</b>  | EtOAc                           | 42 | 90  | 9  |
| 32 | <b>L6</b>  | CH <sub>3</sub> CN              | 36 | 64  | <5 |

[a] Reaction conditions: **1a** (0.10 mmol), **2a** (0.12 mmol), Pd<sub>2</sub>(dba)<sub>3</sub>·CHCl<sub>3</sub> (5 mol%) and ligand (10 mol%), solvent (2 mL), 25 °C, under N<sub>2</sub> for 12 h. [b] Determined by <sup>1</sup>H NMR analysis using CH<sub>2</sub>Br<sub>2</sub> as the internal reference.

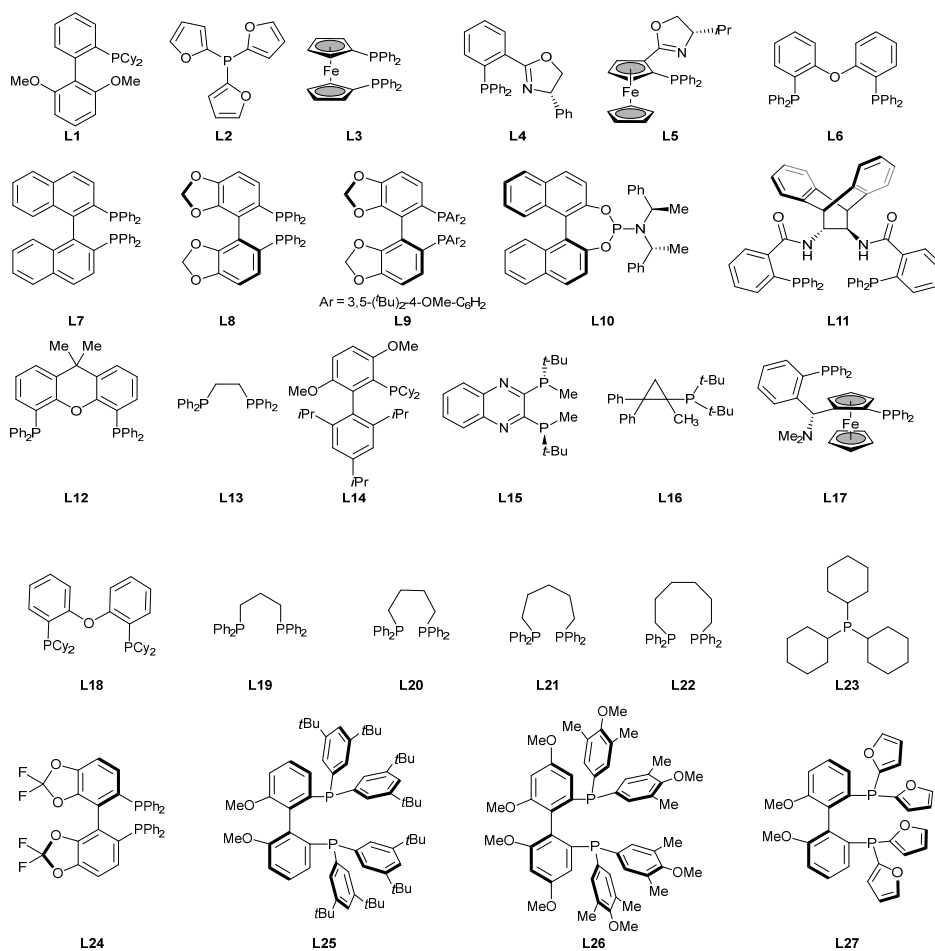

**Table S3. Screening of temperature and the stoichiometric amount of 2b for the (4+3) cycloaddition of BCB 1a<sup>[a]</sup>**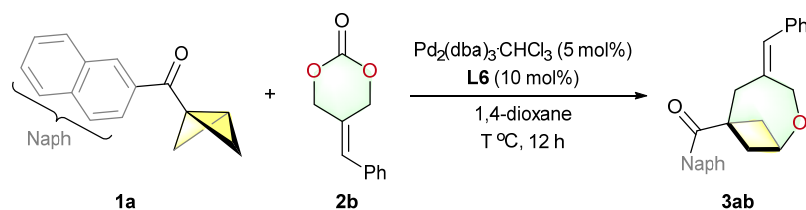

| Entry            | T (°C)     | <b>1a</b><br>(equiv.) | <b>2b</b><br>(equiv.) | Conversion of<br><b>1a</b> [%] <sup>[b]</sup> | Conversion of<br><b>2a</b> [%] <sup>[b]</sup> | Yield of<br><b>3ab</b> [%] <sup>[b]</sup> |
|------------------|------------|-----------------------|-----------------------|-----------------------------------------------|-----------------------------------------------|-------------------------------------------|
| 1 <sup>[c]</sup> | 0          | 1.0                   | 1.2                   | 53                                            | 87                                            | 5                                         |
| 2                | 25         | 1.0                   | 1.2                   | 71                                            | 95                                            | 19                                        |
| 3                | 65         | 1.0                   | 1.2                   | 76                                            | >99                                           | 30                                        |
| 4                | 85         | 1.0                   | 1.2                   | 77                                            | 97                                            | 34                                        |
| 5                | 100        | 1.0                   | 1.2                   | 90                                            | 97                                            | 42                                        |
| <b>6</b>         | <b>100</b> | <b>1.0</b>            | <b>2.0</b>            | <b>100</b>                                    | <b>99</b>                                     | <b>53</b>                                 |
| 7                | 100        | 1.0                   | 3.0                   | 100                                           | 98                                            | 46                                        |

[a] Reaction conditions: **1a** (0.10 mmol, 1.0 equiv.), **2a** (x equiv.),  $\text{Pd}_2(\text{dba})_3\cdot\text{CHCl}_3$  (5 mol%) and **L6** (10 mol%), 1,4-dioxane (2 mL), T °C, under  $\text{N}_2$  for 12 h. [b] Determined by  $^1\text{H}$  NMR analysis using  $\text{CH}_2\text{Br}_2$  as the internal reference. [c] THF was used.

### 3 General Procedure for the (4+3) Cycloadditions of BCBs **1** and ADTMC **2a** (GP1)

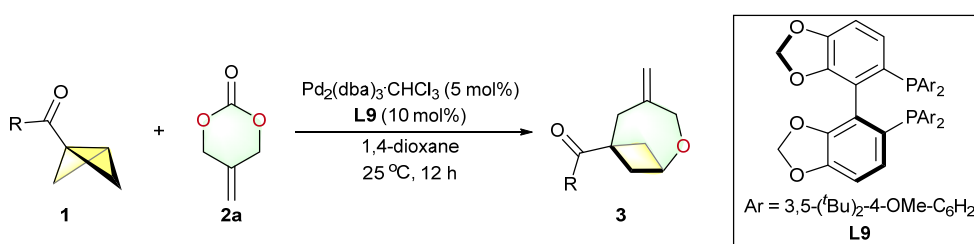

Under an atmosphere of  $\text{N}_2$ , to a 25 mL oven-dried Schlenk tube were added BCBs **1** (0.20 mmol, 1.0 equiv), ADTMC **2a** (27.4 mg, 0.24 mmol, 1.2 equiv),  $\text{Pd}_2(\text{dba})_3\cdot\text{CHCl}_3$  (10.24 mg, 0.010 mmol, 5 mol%), **L9** (23.6 mg, 0.020 mmol, 10 mol%) and 1,4-dioxane (4.0 mL). Then the resulting mixture was stirred at 25 °C for 12 h. After the solvent was removed under reduced pressure, the residue was directly subjected to a column

chromatography purification using petroleum ether /EtOAc (10:1, v/v) as the eluent, to afford the desired product **3**.

#### 4 General Procedure for the (4+3) Cycloadditions of BCBs and substituted ADTMCs (GP2)

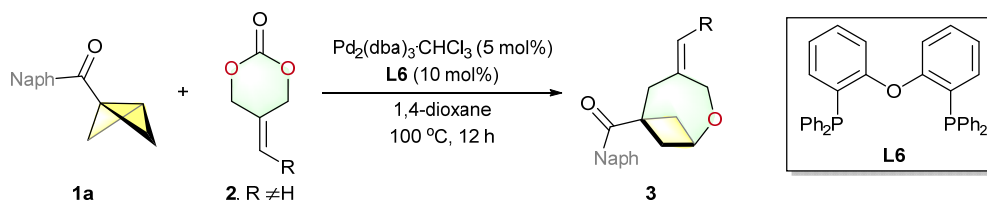

Under an atmosphere of  $\text{N}_2$ , to a 25 mL oven-dried Schlenk tube were added BCB **1a** (20.83 mg, 0.10 mmol, 1.0 equiv), ADTMC **2** (0.20 mmol, 2.0 equiv),  $\text{Pd}_2(\text{dba})_3 \cdot \text{CHCl}_3$  (5.12 mg, 0.005 mmol, 5 mol%), **L6** (5.39 mg, 0.010 mmol, 10 mol%) and 1,4-dioxane (2.0 mL). Then the resulting mixture was stirred at 100 °C for 12 h. After the solvent was removed under reduced pressure, the residue was directly subjected to a column chromatography purification using petroleum ether /EtOAc (15:1, v/v) as the eluent, to afford the desired product **3**.

#### 5 Scale-Up Experiment

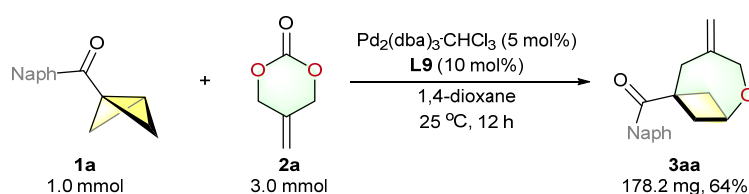

Under an atmosphere of  $\text{N}_2$ , to a 25 mL oven-dried Schlenk tube were added  $\text{Pd}_2(\text{dba})_3 \cdot \text{CHCl}_3$  (51.2 mg, 0.05 mmol, 5 mol%) and **L9** (118.0 mg, 0.1 mmol, 10 mol%), followed by 5.0 mL of anhydrous 1,4-dioxane. The solution was stirred at 25 °C for 10 minutes. The **1a** (208.3 mg, 1.0 mmol, 1.0 equiv), **2a** (342.3 mg, 3.0 mmol) and 1,4-dioxane (7.0 mL) were added. Then the resulting mixture was stirred at 25 °C for 12 h. After removal of the solvents under reduced pressure, the crude product was purified by flash chromatography on silica gel (petroleum ether/EtOAc = 10/1) to afford analytically pure product **3aa** as a white solid (178.2 mg, 64% yield).



## 6 Synthetic Transformations

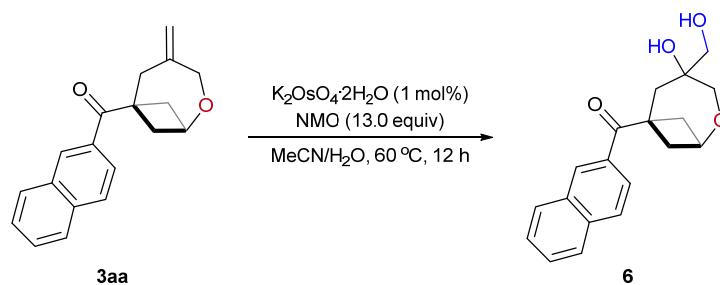

**Synthesis of (6):** To a solution of **3aa** (0.10 mmol, 27.84 mg, 1.0 equiv) in MeCN (1.6 mL) and  $\text{H}_2\text{O}$  (0.4 mL) was added  $\text{K}_2\text{OsO}_4 \cdot 2\text{H}_2\text{O}$  (1.0  $\mu\text{mol}$ , 0.3 mg, 1 mol%), *N*-methylmorpholine-*N*-oxide (NMO) (1.30 mmol, 152.3 mg, 13.0 equiv). The reaction mixture was stirred at 60 °C for 12 h. After completion (monitored by TLC), the mixture was then quenched with aqueous  $\text{Na}_2\text{S}_2\text{O}_3$  and stirred for 30 mins. The biphasic reaction mixture was then extracted with EtOAc and the combined organic layers were washed with brine, dried over  $\text{Na}_2\text{SO}_4$ . The filtrate was evaporated under *vacuo*, and purified by silica gel column chromatography (petroleum ether/EtOAc = 1/1) to afford **6** as a white solid (29.0 mg, 93% yield).

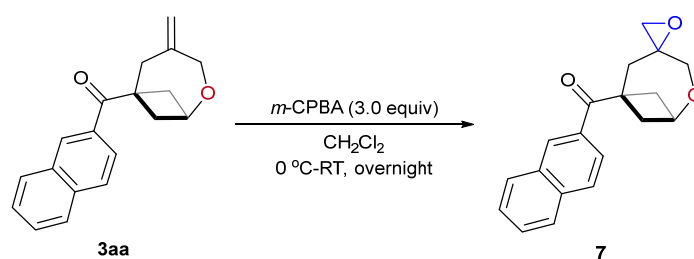

**Synthesis of (7):** To a 25 mL Schlenk tube equipped with a stir bar was charged with **3aa** (0.10 mmol, 27.8 mg, 1.0 equiv) and dichloromethane (2 mL). The mixture was cooled to 0 °C and then *m*-CPBA (85%) (0.3 mmol, 51.8 mg, 3.0 equiv) was added to the reaction. The mixture was slowly warmed to room temperature and stirred overnight. Then, the mixture was quenched with a saturated aqueous  $\text{NaHCO}_3$  solution, then diluted with water. The aqueous phase was extracted twice with dichloromethane. The combined organic phases were washed by brine and dried over  $\text{Na}_2\text{SO}_4$  and concentrated under reduced pressure after filtration. The residue was directly purified

by silica gel column chromatography using (petroleum ether/EtOAc = 3/1) as the eluent to give product **7** as a white solid (18.2 mg, 62% yield).

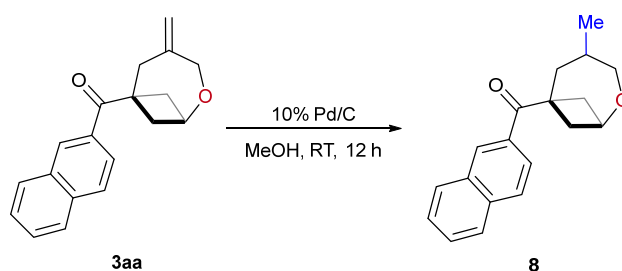

**Synthesis of (8):** To a solution of **3aa** (0.15 mmol, 41.8 mg, 1.0 equiv) in MeOH (3.0 mL) was added Pd/C (10 wt%) (4.2 mg). This flask was in a vacuum and back-filled with H<sub>2</sub> (1 atm). After being stirred at room temperature overnight, the reaction solution was filtered, and the filtered-cake was washed with EtOAc (5.0 mL). The filtrate was evaporated under *vacuo*, and purified by silica gel column chromatography (petroleum ether/EtOAc = 20/1) to afford **8** as a yellow oil (32.4 mg, 77% yield).

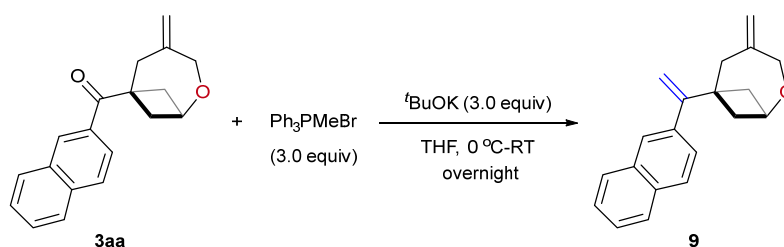

**Synthesis of (9):** To a 25 mL Schlenk tube equipped with a stir bar was charged with methyl triphenylphosphonium bromide (0.30 mmol, 107.2 mg, 3.0 equiv) and anhydrous THF (1 mL). The mixture was cooled to 0 °C and then <sup>t</sup>BuOK (0.3 mmol, 33.7 mg, 3.0 equiv) was added to the reaction. The resulting yellow suspension was stirred at 0 °C for 45 min, then a solution of **3aa** (0.10 mmol, 27.8 mg, 1.0 equiv) in THF (1 mL) added dropwise. The resulting mixture was warmed gradually to room temperature and stirred until **3aa** disappeared (monitored by TLC). The reaction mixture was quenched with water, extracted with EtOAc, dried over Na<sub>2</sub>SO<sub>4</sub>, filtered and concentrated in *vacuo*. The residue was purification by flash chromatography on silica gel (petroleum ether/EtOAc = 30/1) to afford analytically pure product **9** as a white solid (26.3 mg, 95% yield).

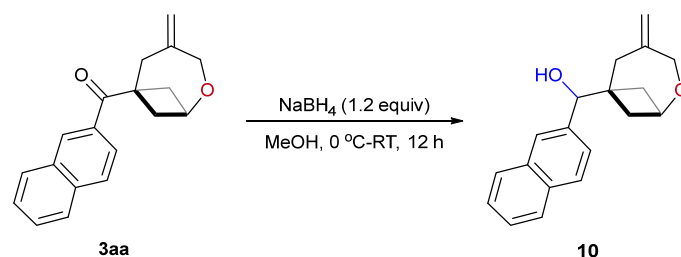

**Synthesis of (10):** To a solution of **3aa** (0.10 mmol, 27.8 mg, 1.0 equiv) in the MeOH (2.0 mL) was added  $\text{NaBH}_4$  (4.5 mg, 0.12 mmol, 1.2 equiv) at 0 °C. The mixture was slowly warmed to room temperature and stirred overnight. Then aqueous saturated  $\text{NH}_4\text{Cl}$  solution (5 mL) was added to quench the reaction. The aqueous phase was extracted with EtOAc. The combined organic phases were washed by brine and dried over  $\text{Na}_2\text{SO}_4$  and concentrated under reduced pressure after filtration. The crude residue was purified by silica gel column chromatography (petroleum ether/EtOAc = 5/1) to afford **10** as a colorless oil (23.9 mg, 85% yield).

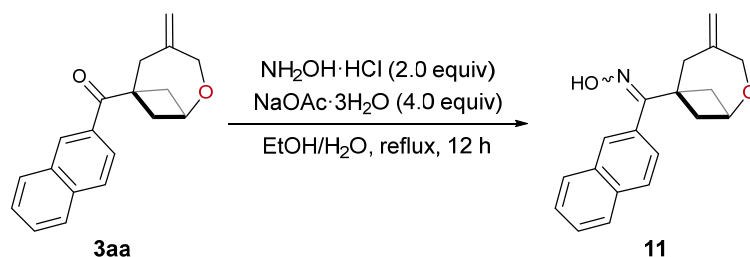

**Synthesis of (11):** **3aa** (0.10 mmol, 27.8 mg, 1.0 equiv) and hydroxylamine hydrochloride (0.20 mmol, 13.9 mg, 2.0 equiv) were dissolved in EtOH (0.5 mL) and  $\text{H}_2\text{O}$  (1 mL). To the mixture was added  $\text{NaOAc}\cdot 3\text{H}_2\text{O}$  (0.4 mmol, 54.4 mg, 4.0 equiv) and the reaction was heated under reflux for 12 h. After completion of the reaction, the reaction mixture was cooled to room temperature, and water (5 mL) were added. The aqueous layer was extracted three times with EtOAc (3×15 mL). The combined organic phases were washed by brine and dried over  $\text{Na}_2\text{SO}_4$  and concentrated under reduced pressure after filtration. The product was purified by column chromatography on silica gel (petroleum ether/ EtOAc = 1:1) to afford **11** (the major isomer: 16.2 mg, 55%; the minor isomer: 12.8 mg, 44%) as a white solid.

## 7 Sensitivity Assessment<sup>[3]</sup>

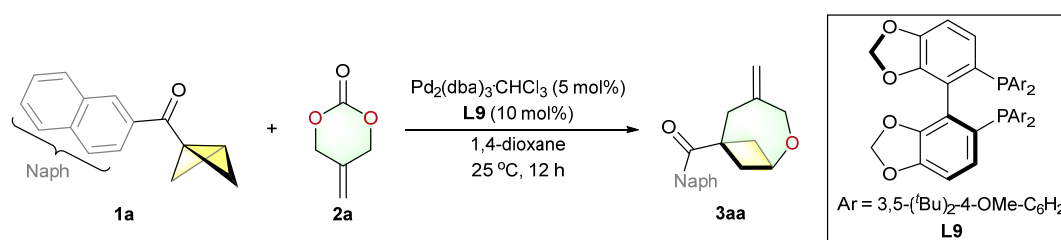

**Standard conditions:** Under an atmosphere of  $\text{N}_2$ , to a 25 mL oven-dried Schlenk tube were added BCB **1a** (0.10 mmol, 20.8 mg, 1.0 equiv), ADTMC **2a** (0.12 mmol, 13.7 mg, 1.2 equiv),  $\text{Pd}_2(\text{dba})_3\cdot\text{CHCl}_3$  (5.12 mg, 0.005 mmol, 5 mol%), **L9** (11.8 mg, 0.010 mmol, 10 mol%) and 1,4-dioxane (2.0 mL). Then the resulting mixture was stirred at 25 °C for 12 h. After the solvent was removed under reduced pressure,  $\text{CH}_2\text{Br}_2$  (0.10 mmol, 17.4 mg) was added as an internal standard, and the yield was determined by  $^1\text{H}$  NMR analysis of the crude mixture.

**Table S4. Sensitivity assessment**

| Entry | Description          | Deviation from standard condition              | Yield | Deviation |
|-------|----------------------|------------------------------------------------|-------|-----------|
| 1     | High <i>c</i>        | 1,4-dioxane (1 mL)                             | 75%   | -21%      |
| 2     | Low <i>c</i>         | 1,4-dioxane (3 mL)                             | 83%   | -13%      |
| 3     | $\text{H}_2\text{O}$ | +5 $\mu\text{L}$ $\text{H}_2\text{O}$          | 61%   | -35%      |
| 4     | Low $\text{O}_2$     | degassed solvent                               | 96%   | 0%        |
| 5     | High $\text{O}_2$    | +5 mL air                                      | 97%   | +1%       |
| 6     | Low <i>T</i>         | at 15 °C                                       | 73%   | -23%      |
| 7     | High <i>T</i>        | at 40 °C                                       | 89%   | -7%       |
| 8     | Big Scale            | 1.0 mmol scale<br>(10 times of standard scale) | 65%   | -31%      |
| 9     | control              | -                                              | 96%   | -         |

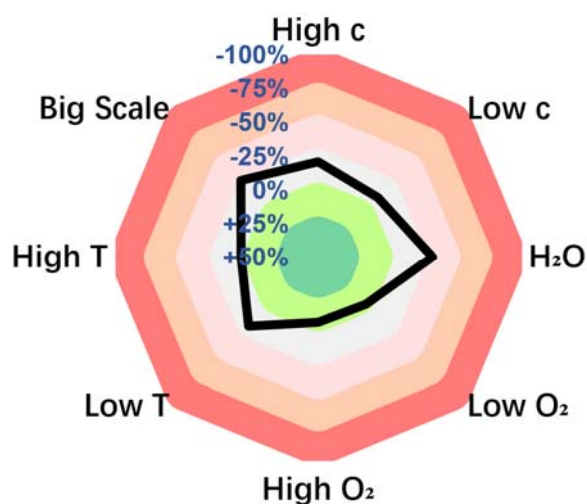

**Comment:** we conducted condition-based sensitivity screening, revealing that the O<sub>2</sub> level had no significant impact on the reaction. However, this reaction exhibited moderate sensitivity to concentration, moisture, temperature, and scale.

## 8 Unsuccessful Substrates

The following Scheme S1 and Scheme S2 list the BCB and ADTMC substrates that were unsuccessfully tested. The reactions were carried out according to General Procedure and were analyzed by crude <sup>1</sup>H NMR with CH<sub>2</sub>Br<sub>2</sub> as an internal standard.

**Scheme S1. Unsuccessful BCB substrates**

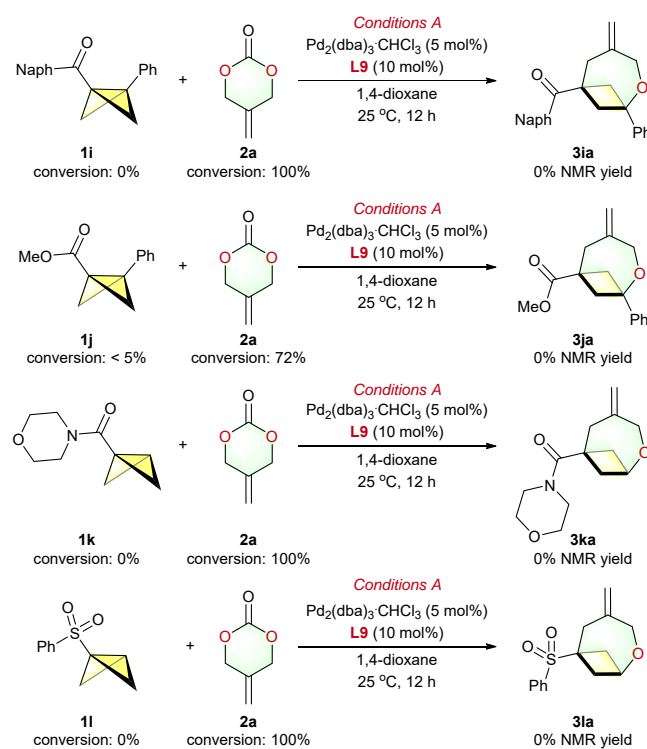

## Scheme S2. Unsuccessful ADTMC substrates

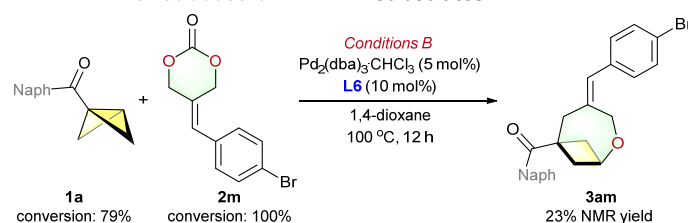

## 9 Characterization Data of the Products

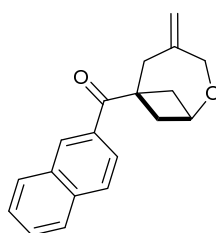

**3aa**  
C<sub>19</sub>H<sub>18</sub>O<sub>2</sub>  
M = 278.35 g/mol

**(4-Methylene-2-oxabicyclo[4.1.1]octan-6-yl)(naphthalen-2-yl)methanone (3aa):**

Prepared from bicyclo[1.1.0]butan-1-yl(naphthalen-2-yl)methanone (**1a**, 41.7 mg, 0.20 mmol) and 5-methylene-1,3-dioxan-2-one (**2a**, 27.4 mg, 0.24 mmol) according to the **GP1** at 25 °C for 12 h. Purification by flash chromatography on silica gel using petroleum ether/EtOAc (10/1) afforded **3aa** as a white solid (51.8 mg, 93% yield).

**3aa**:  $R_f$  = 0.30 (petroleum ether/EtOAc = 10/1). **<sup>1</sup>H NMR** (600 MHz, CDCl<sub>3</sub>): δ 8.31 (s, 1H), 7.95 (d,  $J$  = 7.8 Hz, 1H), 7.90-7.88 (m, 3H), 7.62 (t,  $J$  = 7.2 Hz, 1H), 7.56 (t,  $J$  = 7.2 Hz, 1H), 5.33 (s, 1H), 5.14 (s, 1H), 4.48 (t,  $J$  = 6.0 Hz, 1H), 4.41 (s, 2H), 2.87-2.84 (m, 4H), 2.64 (d,  $J$  = 11.4 Hz, 2H) ppm. **<sup>13</sup>C NMR** (150 MHz, CDCl<sub>3</sub>): δ 203.6, 144.3, 135.4, 132.4, 131.2, 130.6, 129.6, 128.6, 128.5, 127.7, 126.8, 124.6, 119.6, 72.6, 68.7, 50.9, 43.6, 37.1 ppm. **HRMS** (ESI)  $m/z$ : [M+H]<sup>+</sup> calcd. for C<sub>19</sub>H<sub>19</sub>O<sub>2</sub>: 279.1380; found: 279.1272.

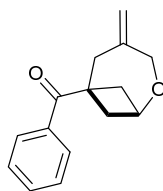

**3ba**  
C<sub>15</sub>H<sub>16</sub>O<sub>2</sub>  
M = 228.29 g/mol

**(4-Methylene-2-oxabicyclo[4.1.1]octan-6-yl)(phenyl)methanone (3ba)**: Prepared from bicyclo[1.1.0]butan-1-yl(phenyl)methanone (**1b**, 31.6 mg, 0.20 mmol) and 5-methylene-1,3-dioxan-2-one (**2a**, 27.4 mg, 0.24 mmol) according to the **GP1** at 25 °C for 12 h. Purification by flash chromatography on silica gel using petroleum ether/EtOAc (15/1) afforded **3ba** as a yellow oil (34.2 mg, 75% yield).

**3ba**:  $R_f$  = 0.35 (petroleum ether/EtOAc = 15/1).  $^1\text{H NMR}$  (600 MHz,  $\text{CDCl}_3$ ):  $\delta$  7.82 (d,  $J$  = 7.8 Hz, 2H), 7.55 (t,  $J$  = 7.2 Hz, 1H), 7.46 (t,  $J$  = 7.8 Hz, 2H), 5.29 (s, 1H), 5.10 (s, 1H), 4.44 (t,  $J$  = 6.6 Hz, 1H), 4.37 (s, 2H), 2.79-2.76 (m, 4H), 2.56 (d,  $J$  = 14.4 Hz, 2H) ppm.  $^{13}\text{C NMR}$  (150 MHz,  $\text{CDCl}_3$ ):  $\delta$  203.5, 144.3, 134.0, 132.9, 128.9, 128.6, 119.5, 72.5, 68.7, 50.8, 43.4, 36.9 ppm. **HRMS** (ESI)  $m/z$ :  $[\text{M}+\text{H}]^+$  calcd. for  $\text{C}_{15}\text{H}_{17}\text{O}_2$ : 229.1223; found: 229.1220.

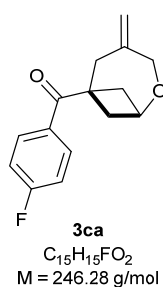

**(4-Fluorophenyl)(4-methylene-2-oxabicyclo[4.1.1]octan-6-yl)methanone (3ca)**: Prepared from bicyclo[1.1.0]butan-1-yl(4-fluorophenyl)methanone (**1c**, 26.4 mg, 0.15 mmol) and 5-methylene-1,3-dioxan-2-one (**2a**, 20.5 mg, 0.18 mmol) according to the **GP1** at 25 °C for 12 h. Purification by flash chromatography on silica gel using petroleum ether/EtOAc (10/1) afforded **3ca** as a white solid (16.0 mg, 43% yield).

**3ca**:  $R_f$  = 0.30 (petroleum ether/EtOAc = 15/1).  $^1\text{H NMR}$  (400 MHz,  $\text{CDCl}_3$ ):  $\delta$  7.85 (dd,  $J$  = 8.4, 5.6 Hz, 2H), 7.15 (t,  $J$  = 8.4 Hz, 2H), 5.30 (s, 1H), 5.11 (s, 1H), 4.43 (t,  $J$  = 6.4 Hz, 1H), 4.36 (s, 2H), 2.79-2.74 (m, 4H), 2.57-2.52 (m, 2H) ppm.  $^{13}\text{C NMR}$  (150 MHz,  $\text{CDCl}_3$ ):  $\delta$  201.9, 165.5 (d,  $J$  = 253.7 Hz), 144.1, 131.6 (d,  $J$  = 9.2 Hz), 130.3 (d,  $J$  = 3.0 Hz), 119.7, 115.8 (d,  $J$  = 21.8 Hz), 72.4, 68.6, 50.6, 43.4, 36.9 ppm.  $^{19}\text{F NMR}$  (376 MHz,  $\text{CDCl}_3$ )  $\delta$  -104.92 ppm. **HRMS** (ESI)  $m/z$ :  $[\text{M}+\text{H}]^+$  calcd. for  $\text{C}_{15}\text{H}_{16}\text{FO}_2$ : 247.1129; found: 247.1139.

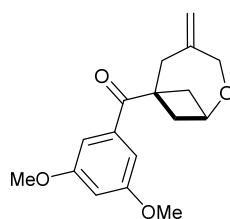

**3da**  
C<sub>17</sub>H<sub>20</sub>O<sub>4</sub>  
M = 288.34 g/mol

**(3,5-Dimethoxyphenyl)(4-methylene-2-oxabicyclo[4.1.1]octan-6-yl)methanone (3da):** Prepared from bicyclo[1.1.0]butan-1-yl(3,5-dimethoxyphenyl)methanone (**1d**, 43.7 mg, 0.20 mmol) and 5-methylene-1,3-dioxan-2-one (**2a**, 27.4 mg, 0.24 mmol) according to the **GP1** at 25 °C for 12 h. Purification by flash chromatography on silica gel using petroleum ether/EtOAc (10/1) afforded **3da** as a white solid (42.9 mg, 74% yield).

**3da:**  $R_f$  = 0.3 (petroleum ether/EtOAc = 10/1). **<sup>1</sup>H NMR** (400 MHz, CDCl<sub>3</sub>): δ 6.95 (s, 2H), 6.64 (s, 1H), 5.29 (s, 1H), 5.11 (s, 1H), 4.42 (t,  $J$  = 6.0 Hz, 1H), 4.35 (s, 2H), 3.83 (s, 6H), 2.79-2.73 (m, 4H), 2.56-2.51 (m, 2H) ppm. **<sup>13</sup>C NMR** (100 MHz, CDCl<sub>3</sub>): δ 203.2, 160.7, 144.3, 135.7, 119.5, 106.7, 105.1, 72.4, 68.6, 55.5, 50.8, 43.5, 37.0 ppm. **HRMS** (ESI)  $m/z$ : [M+H]<sup>+</sup> calcd. for C<sub>17</sub>H<sub>21</sub>O<sub>4</sub>: 289.1434; found: 289.1427.

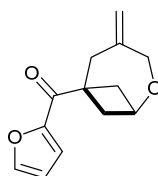

**3ea**  
C<sub>13</sub>H<sub>14</sub>O<sub>3</sub>  
M = 218.25 g/mol

**Furan-2-yl(4-methylene-2-oxabicyclo[4.1.1]octan-6-yl)methanone (3ea):** Prepared from bicyclo[1.1.0]butan-1-yl(furan-2-yl)methanone (**1e**, 29.6 mg, 0.20 mmol) and 5-methylene-1,3-dioxan-2-one (**2a**, 27.4 mg, 0.24 mmol) according to the **GP1** at 25 °C for 12 h. Purification by flash chromatography on silica gel using petroleum ether/EtOAc (10/1) afforded **3ea** as a white solid (26.1 mg, 60% yield).

**3ea:**  $R_f$  = 0.3 (petroleum ether/EtOAc = 15/1). **<sup>1</sup>H NMR** (400 MHz, CDCl<sub>3</sub>): δ 7.59 (s, 1H), 7.14 (d,  $J$  = 3.2 Hz, 1H), 6.55-6.54 (m, 1H), 5.28 (s, 1H), 5.09 (s, 1H), 4.43 (t,  $J$  =



6.4 Hz, 1H), 4.35 (s, 2H), 2.74 (s, 2H), 2.71-2.65 (m, 2H), 2.52-2.47 (m, 2H) ppm.  $^{13}\text{C}$  NMR (100 MHz,  $\text{CDCl}_3$ ):  $\delta$  192.5, 150.8, 146.1, 144.3, 119.5, 118.1, 112.1, 72.4, 68.6, 49.8, 42.5, 35.7 ppm. HRMS (ESI)  $m/z$ :  $[\text{M}+\text{H}]^+$  calcd. for  $\text{C}_{13}\text{H}_{15}\text{O}_3$ : 219.1016; found: 219.1028.

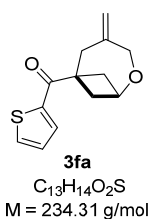

**(4-Methylene-2-oxabicyclo[4.1.1]octan-6-yl)(thiophen-2-yl)methanone (3fa)**: Prepared from bicyclo[1.1.0]butan-1-yl(thiophen-2-yl)methanone (**1f**, 24.6 mg, 0.15 mmol) and 5-methylene-1,3-dioxan-2-one (**2a**, 20.5 mg, 0.18 mmol) according to the **GP1** at 25 °C for 12 h. Purification by flash chromatography on silica gel using petroleum ether/EtOAc (10/1) afforded **3fa** as a white solid (26.3 mg, 75% yield).

**3fa**:  $R_f = 0.30$  (petroleum ether/EtOAc = 15/1).  $^1\text{H}$  NMR (400 MHz,  $\text{CDCl}_3$ ):  $\delta$  7.64 (d,  $J = 4.4$  Hz, 2H), 7.56 (d,  $J = 3.6$  Hz, 2H), 7.13 (t,  $J = 4.4$  Hz, 2H), 5.29 (s, 1H), 5.11 (s, 1H), 4.43 (t,  $J = 6.4$  Hz, 1H), 4.35 (s, 2H), 2.79 (s, 2H), 2.78-2.72 (m, 2H), 2.56-2.55 (m, 1H), 2.53-2.51 (m, 1H) ppm.  $^{13}\text{C}$  NMR (100 MHz,  $\text{CDCl}_3$ ):  $\delta$  196.8, 144.2, 140.8, 133.4, 132.2, 128.1, 119.6, 72.2, 68.6, 50.7, 43.7, 36.6 ppm. HRMS (ESI)  $m/z$ :  $[\text{M}+\text{H}]^+$  calcd. for  $\text{C}_{13}\text{H}_{15}\text{O}_2\text{S}$ : 236.0866; found: 236.0873.

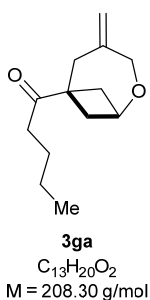

**1-(4-Methylene-2-oxabicyclo[4.1.1]octan-6-yl)pentan-1-one (3ga)**: Prepared from bicyclo[1.1.0]butan-1-yl(naphthalen-2-yl)methanone (**1g**, 27.6 mg, 0.20 mmol) and 5-methylene-1,3-dioxan-2-one (**2a**, 27.4 mg, 0.24 mmol) according to the **GP1** at 100 °C

for 12 h. Purification by flash chromatography on silica gel using petroleum ether/EtOAc (15/1) afforded **3ga** as a yellow oil (18.7 mg, 42% yield).

**3ga**:  $R_f$  = 0.35 (petroleum ether/EtOAc = 15/1).  $^1\text{H NMR}$  (400 MHz,  $\text{CDCl}_3$ ):  $\delta$  5.24 (s, 1H), 5.07 (s, 1H), 4.37 (t,  $J$  = 5.6 Hz, 1H), 4.28 (s, 2H), 2.56 (s, 2H), 2.53-2.48 (m, 2H), 2.42 (t,  $J$  = 7.2 Hz, 2H), 2.26-2.22 (s, 2H), 1.62-1.52 (m, 2H), 1.38-1.26 (m, 2H), 0.92 (t,  $J$  = 7.2 Hz, 3H) ppm.  $^{13}\text{C NMR}$  (100 MHz,  $\text{CDCl}_3$ ):  $\delta$  213.1, 144.2, 119.4, 71.6, 68.4, 53.4, 51.2, 41.4, 36.1, 34.6, 25.8, 22.4, 13.9 ppm. **HRMS** (ESI)  $m/z$ :  $[\text{M}+\text{H}]^+$  calcd. for  $\text{C}_{13}\text{H}_{21}\text{O}_2$ : 210.1614; found: 210.1608.

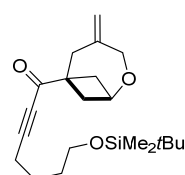

**3ha**  
 $\text{C}_{21}\text{H}_{34}\text{O}_3\text{Si}$   
 $M = 362.59 \text{ g/mol}$

#### 7-((*tert*-Butyldimethylsilyl)oxy)-1-(4-methylene-2-oxabicyclo[4.1.1]octan-6-yl)hept-2-yn-1-one

**(3ha)**: Prepared from 1-(bicyclo[1.1.0]butan-1-yl)-8-((*tert*-butyldimethylsilyl)oxy)oct-3-yn-1-one (**1h**, 61.3 mg, 0.20 mmol) and 5-methylene-1,3-dioxan-2-one (**2a**, 27.4 mg, 0.24 mmol) according to the **GP1** at 100 °C for 12 h. Purification by flash chromatography on silica gel using petroleum ether/EtOAc (10/1) afforded **3ha** as a yellow oil (47.4 mg, 63% yield).

**3ha**:  $R_f$  = 0.30 (petroleum ether/EtOAc = 20/1).  $^1\text{H NMR}$  (400 MHz,  $\text{CDCl}_3$ ):  $\delta$  5.23 (s, 1H), 5.09 (s, 1H), 4.41 (t,  $J$  = 6.0 Hz, 1H), 4.27 (s, 2H), 3.64 (t,  $J$  = 5.2 Hz, 2H), 2.68 (s, 2H), 2.66-2.62 (m, 2H), 2.45 (t,  $J$  = 5.6 Hz, 2H), 2.26-2.22 (m, 2H), 1.72-1.62 (m, 4H), 0.89 (s, 9H), 0.05 (s, 6H) ppm.  $^{13}\text{C NMR}$  (100 MHz,  $\text{CDCl}_3$ ):  $\delta$  190.6, 144.0, 119.5, 97.1, 78.3, 71.8, 68.4, 67.0, 62.3, 51.5, 40.5, 34.9, 31.8, 25.9, 24.4, 18.9, 18.3, -5.4 ppm. **HRMS** (ESI)  $m/z$ :  $[\text{M}+\text{H}]^+$  calcd. for  $\text{C}_{21}\text{H}_{35}\text{O}_3\text{Si}$ : 363.2350; found: 363.2344.

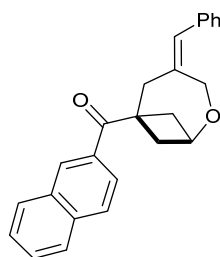

**3ab**  
 $C_{25}H_{22}O_2$   
 $M = 354.45 \text{ g/mol}$

**(4-((Z)-benzylidene)-2-oxabicyclo[4.1.1]octan-6-yl)(naphthalen-2-yl)methanone ((Z)-3ab):** Prepared from bicyclo[1.1.0]butan-1-yl(naphthalen-2-yl)methanone (**1a**, 20.8 mg, 0.10 mmol) and 5-benzylidene-1,3-dioxan-2-one (**2b**, 38.0 mg, 0.20 mmol) according to the **GP2** at 100 °C for 12 h. Purification by flash chromatography on silica gel using petroleum ether/EtOAc (15/1) afforded **3ab** as a white solid (16.3 mg, 46% yield).

**(Z)-3ab:**  $R_f = 0.35$  (petroleum ether/EtOAc = 15/1). **(Z)-3ab:**  $^1\text{H NMR}$  (400 MHz,  $\text{CDCl}_3$ ):  $\delta$  8.33 (s, 1H), 7.95-7.87 (m, 4H), 7.61 (t,  $J = 7.2 \text{ Hz}$ , 1H), 7.55 (t,  $J = 7.6 \text{ Hz}$ , 1H), 7.47 (d,  $J = 7.6 \text{ Hz}$ , 2H), 7.41 (t,  $J = 7.2 \text{ Hz}$ , 2H), 7.31 (t,  $J = 7.6 \text{ Hz}$ , 1H), 6.69 (s, 1H), 4.57 (t,  $J = 6.4 \text{ Hz}$ , 1H), 4.52 (s, 2H), 2.92 (s, 2H), 2.91-2.86 (m, 2H), 2.81-2.77 (m, 2H) ppm.  $^{13}\text{C NMR}$  (100 MHz,  $\text{CDCl}_3$ ):  $\delta$  203.6, 137.2, 136.5, 135.4, 133.4, 132.5, 131.2, 130.6, 129.6, 129.0, 128.6, 128.5, 128.4, 127.7, 127.4, 126.8, 124.7, 73.2, 62.7, 51.7, 45.6, 37.4 ppm. **HRMS** (ESI)  $m/z$ :  $[\text{M}+\text{H}]^+$  calcd. for  $\text{C}_{25}\text{H}_{23}\text{O}_2$ : 355.1693; found: 355.1688.

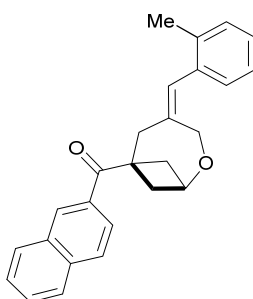

**3ac**  
 $C_{26}H_{24}O_2$   
 $M = 368.48 \text{ g/mol}$

**(4-((Z)-2-Methylbenzylidene)-2-oxabicyclo[4.1.1]octan-6-yl)(naphthalen-2-yl)methanone ((Z)-3ac):** Prepared from bicyclo[1.1.0]butan-1-yl(naphthalen-2-yl)methanone (**1a**, 20.8 mg, 0.10 mmol) and 5-(2-methylbenzylidene)-1,3-dioxan-2-one (**2c**, 40.9 mg, 0.20 mmol)

according to the **GP2** at 100 °C for 12 h. Purification by flash chromatography on silica gel using petroleum ether/EtOAc (20/1) afforded **3ac** as a white solid (23.6 mg, 64% yield).

(*Z*)-**3ac**:  $R_f$  = 0.30 (petroleum ether/EtOAc = 20/1).  $^1\text{H NMR}$  (400 MHz,  $\text{CDCl}_3$ ):  $\delta$  8.34 (s, 1H), 7.95-7.87 (m, 4H), 7.62-7.55 (m, 3H), 7.26-7.20 (m, 3H), 6.67 (s, 1H), 4.55 (t,  $J$  = 6.0 Hz, 1H), 4.44 (s, 2H), 2.97 (s, 2H), 2.92-2.88 (m, 2H), 2.78 (d,  $J$  = 11.6 Hz, 2H), 2.28 (s, 3H) ppm.  $^{13}\text{C NMR}$  (100 MHz,  $\text{CDCl}_3$ ):  $\delta$  203.6, 136.9, 136.3, 135.6, 135.4, 132.6, 132.4, 131.3, 130.6, 129.83, 129.77, 129.6, 128.54, 128.46, 127.7, 127.6, 126.8, 125.8, 124.7, 73.0, 62.8, 51.6, 45.5, 37.3, 20.0 ppm. **HRMS** (ESI)  $m/z$ :  $[\text{M}+\text{H}]^+$  calcd. for  $\text{C}_{26}\text{H}_{25}\text{O}_2$ : 369.1849; found: 369.1843.

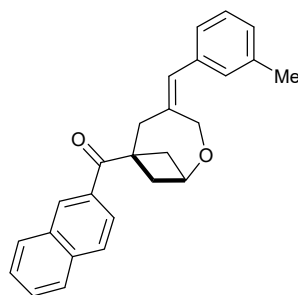

**3ad**  
 $\text{C}_{26}\text{H}_{24}\text{O}_2$   
 $M = 368.48$  g/mol

(4-((*Z*)-3-methylbenzylidene)-2-oxabicyclo[4.1.1]octan-6-yl)(naphthalen-2-yl)methanone ((*Z*)-**3ad**): Prepared from bicyclo[1.1.0]butan-1-yl(naphthalen-2-yl)methanone (**1a**, 20.8 mg, 0.10 mmol) and 5-(3-methylbenzylidene)-1,3-dioxan-2-one (**2d**, 40.9 mg, 0.20 mmol) according to the **GP2** at 100 °C for 12 h. Purification by flash chromatography on silica gel using petroleum ether/EtOAc (15/1) afforded **3ad** as a white solid (16.3 mg, 44% yield).

(*Z*)-**3ad**:  $R_f$  = 0.35 (petroleum ether/EtOAc = 15/1).  $^1\text{H NMR}$  (400 MHz,  $\text{CDCl}_3$ ):  $\delta$  8.33 (s, 1H), 7.95-7.87 (m, 4H), 7.60 (t,  $J$  = 7.2 Hz, 1H), 7.54 (t,  $J$  = 7.6 Hz, 1H), 7.30-7.25 (m, 3H), 7.14-7.12 (m, 1H), 6.65 (s, 1H), 4.56 (t,  $J$  = 6.4 Hz, 1H), 4.52 (s, 2H), 2.91 (s, 2H), 2.89-2.86 (m, 2H), 2.79-2.76 (m, 2H), 2.40 (s, 3H) ppm.  $^{13}\text{C NMR}$  (100 MHz,  $\text{CDCl}_3$ ):  $\delta$  203.6, 138.0, 137.0, 136.5, 135.4, 133.5, 132.5, 131.3, 130.6, 129.64,

129.59, 128.6, 128.5, 128.3, 128.1, 127.7, 126.8, 126.1, 124.7, 73.2, 62.8, 51.7, 45.7, 37.4, 21.5 ppm. **HRMS** (ESI)  $m/z$ :  $[M+H]^+$  calcd. for  $C_{26}H_{25}O_2$ : 369.1849; found: 369.1841.

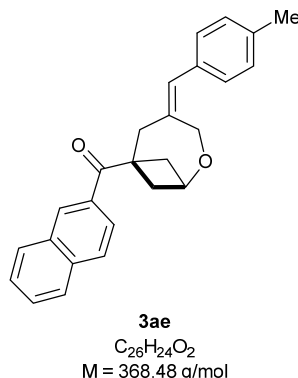

**((1*s*,6*r*)-4-((*Z*)-4-methylbenzylidene)-2-oxabicyclo[4.1.1]octan-6-yl)(naphthalen-2-yl)methanone ((*Z*)-**3ae**):** Prepared from bicyclo[1.1.0]butan-1-yl(naphthalen-2-yl)methanone (**1a**, 20.8 mg, 0.10 mmol) and 5-(4-methylbenzylidene)-1,3-dioxan-2-one (**2e**, 40.9 mg, 0.20 mmol) according to the **GP2** at 100 °C for 12 h. Purification by flash chromatography on silica gel using petroleum ether/EtOAc (15/1) afforded **3ae** as a white solid (15.2 mg, 41% yield).

**(*Z*)-3ae:**  $R_f$  = 0.30 (petroleum ether/EtOAc = 15/1).  **$^1H$  NMR** (600 MHz,  $CDCl_3$ ):  $\delta$  8.33 (s, 1H), 7.95-7.87 (m, 4H), 7.61 (t,  $J$  = 7.2 Hz, 1H), 7.55 (t,  $J$  = 7.8 Hz, 1H), 7.37 (d,  $J$  = 7.8 Hz, 2H), 7.22 (d,  $J$  = 7.8 Hz, 2H), 6.66 (s, 1H), 4.57 (t,  $J$  = 6.0 Hz, 1H), 4.52 (s, 2H), 2.91 (s, 2H), 2.89-2.87 (m, 2H), 2.80-2.76 (m, 2H), 2.39 (s, 3H) ppm.  **$^{13}C$  NMR** (150 MHz,  $CDCl_3$ ):  $\delta$  203.7, 137.2, 136.4, 135.4, 133.6, 133.3, 132.4, 131.2, 130.6, 129.6, 129.1, 128.9, 128.6, 128.5, 127.7, 126.8, 124.7, 73.2, 62.8, 51.7, 45.6, 37.4, 21.2 ppm. **HRMS** (ESI)  $m/z$ :  $[M+H]^+$  calcd. for  $C_{26}H_{25}O_2$ : 369.1849; found: 369.1840.

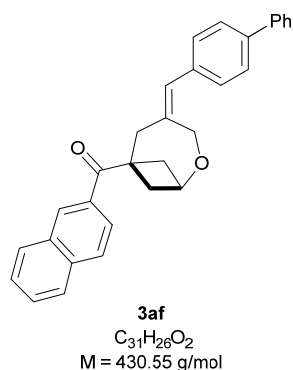

**(Z)-4-([1,1'-Biphenyl]-4-ylmethylene)-2-oxabicyclo[4.1.1]octan-6-yl(naphthalen-2-yl)**

**methanone ((Z)-3af):** Prepared from bicyclo[1.1.0]butan-1-yl(naphthalen-2-yl)methanone (**1a**, 20.8 mg, 0.10 mmol) and 5-([1,1'-biphenyl]-4-ylmethylene)-1,3-dioxan-2-one (**2f**, 53.3 mg, 0.20 mmol) according to the **GP2** at 100 °C for 12 h. Purification by flash chromatography on silica gel using petroleum ether/EtOAc (15/1) afforded **3af** as a white solid (22.1 mg, 51% yield).

**(Z)-3af:**  $R_f$  = 0.30 (petroleum ether/EtOAc = 15/1). **<sup>1</sup>H NMR** (400 MHz, CDCl<sub>3</sub>): δ 8.34 (s, 1H), 7.96-7.87 (m, 4H), 7.65-7.62 (m, 5H), 7.59-7.54 (m, 3H), 7.46 (t,  $J$  = 7.2 Hz, 2H), 7.36 (t,  $J$  = 7.2 Hz, 1H), 6.72 (s, 1H), 4.60-4.57 (m, 3H), 2.94 (s, 2H), 2.90-2.89 (m, 2H), 2.80 (d,  $J$  = 11.6 Hz, 2H) ppm. **<sup>13</sup>C NMR** (100 MHz, CDCl<sub>3</sub>): δ 203.6, 140.7, 140.2, 137.4, 135.5, 135.4, 133.0, 132.4, 131.2, 130.6, 129.6, 129.5, 128.8, 128.6, 128.5, 127.7, 127.4, 127.1, 127.0, 126.8, 124.7, 73.3, 62.8, 51.7, 45.7, 37.4 ppm.

**HRMS** (ESI)  $m/z$ : [M+H]<sup>+</sup> calcd. for C<sub>31</sub>H<sub>27</sub>O<sub>2</sub>: 431.2006; found: 431.1998.

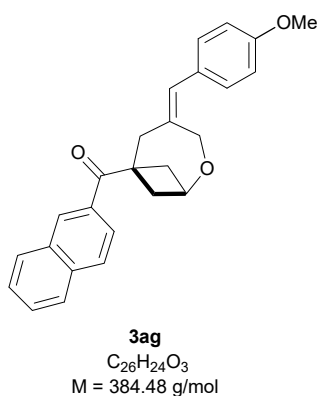

**(4-((Z)-4-Methoxybenzylidene)-2-oxabicyclo[4.1.1]octan-6-yl)(naphthalen-2-yl)methanone ((Z)-3ag):** Prepared from bicyclo[1.1.0]butan-1-yl(naphthalen-2-yl)methanone (**1a**, 20.8 mg,

0.10 mmol) and 5-(4-methoxybenzylidene)-1,3-dioxan-2-one (**2g**, 44.0 mg, 0.20 mmol) according to the **GP2** at 100 °C for 12 h. Purification by flash chromatography on silica gel using petroleum ether/EtOAc (15/1) afforded **3ag** as a yellow solid (17.8 mg, 46% yield).

(*Z*)-**3ag**:  $R_f = 0.25$  (petroleum ether/EtOAc = 15/1).  $^1\text{H NMR}$  (400 MHz,  $\text{CDCl}_3$ ):  $\delta$  8.32 (s, 1H), 7.95-7.87 (m, 4H), 7.60 (t,  $J = 7.2$  Hz, 1H), 7.54 (t,  $J = 7.2$  Hz, 1H), 7.41 (d,  $J = 7.6$  Hz, 2H), 6.94 (d,  $J = 7.6$  Hz, 2H), 6.63 (s, 1H), 4.56 (t,  $J = 6.4$  Hz, 1H), 4.52 (s, 2H), 3.84 (s, 3H), 2.90 (s, 2H), 2.87-2.85 (m, 2H), 2.78 (d,  $J = 11.2$  Hz, 2H) ppm.  $^{13}\text{C NMR}$  (100 MHz,  $\text{CDCl}_3$ ):  $\delta$  203.7, 159.0, 135.8, 135.4, 132.9, 132.5, 131.3, 130.6, 130.3, 129.7, 129.1, 128.5, 128.4, 127.7, 126.8, 124.7, 113.8, 73.2, 62.8, 55.3, 51.8, 45.6, 37.4 ppm. **HRMS** (ESI)  $m/z$ :  $[\text{M}+\text{H}]^+$  calcd. for  $\text{C}_{26}\text{H}_{25}\text{O}_3$ : 385.1798; found: 385.1792.

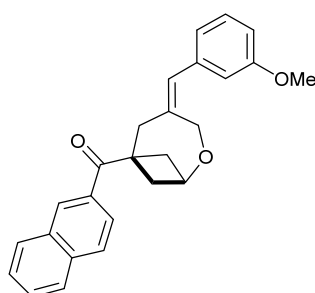

**3ah**  
 $\text{C}_{26}\text{H}_{24}\text{O}_3$   
 $M = 384.48$  g/mol

(4-((*Z*)-3-Methoxybenzylidene)-2-oxabicyclo[4.1.1]octan-6-yl)(naphthalen-2-yl)methanone ((*Z*)-**3ah**): Prepared from bicyclo[1.1.0]butan-1-yl(naphthalen-2-yl)methanone (**1a**, 20.8 mg, 0.10 mmol) and 5-(3-methoxybenzylidene)-1,3-dioxan-2-one (**2h**, 44.0 mg, 0.20 mmol) according to the **GP2** at 100 °C for 12 h. Purification by flash chromatography on silica gel using petroleum ether/EtOAc (15/1) afforded **3ah** as a white solid (16.7 mg, 43% yield).

(*Z*)-**3ah**:  $R_f = 0.35$  (petroleum ether/EtOAc = 15/1).  $^1\text{H NMR}$  (600 MHz,  $\text{CDCl}_3$ ):  $\delta$  8.33 (s, 1H), 7.95-7.88 (m, 4H), 7.61 (t,  $J = 7.2$  Hz, 1H), 7.55 (t,  $J = 7.8$  Hz, 1H), 7.33 (t,  $J = 7.8$  Hz, 1H), 7.09 (d,  $J = 7.2$  Hz, 1H), 7.01 (s, 1H), 6.88 (d,  $J = 8.4$  Hz, 1H), 6.67 (s, 1H), 4.57 (t,  $J = 6.0$  Hz, 1H), 4.53 (s, 2H), 3.85 (s, 3H), 2.92 (s, 2H), 2.89-2.87 (m, 2H),

2.79-2.77 (m, 2H) ppm.  $^{13}\text{C}$  NMR (150 MHz,  $\text{CDCl}_3$ ):  $\delta$  203.7, 159.5, 137.8, 137.5, 135.4, 133.3, 132.4, 131.2, 130.6, 129.6, 129.4, 128.6, 128.5, 127.7, 126.8, 124.7, 121.5, 114.3, 113.0, 73.2, 62.7, 55.2, 51.6, 45.6, 37.4 ppm. HRMS (ESI)  $m/z$ :  $[\text{M}+\text{H}]^+$  calcd. for  $\text{C}_{26}\text{H}_{25}\text{O}_3$ : 385.1798; found: 385.1788.

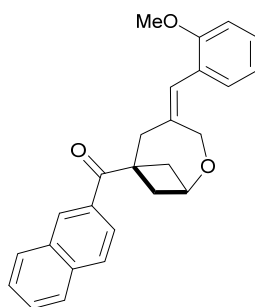

**3ai**  
 $\text{C}_{26}\text{H}_{24}\text{O}_3$   
 $M = 384.48$  g/mol

**(4-((Z)-2-Methoxybenzylidene)-2-oxabicyclo[4.1.1]octan-6-yl)(naphthalen-2-yl)methanone ((Z)-3ai)**: Prepared from bicyclo[1.1.0]butan-1-yl(naphthalen-2-yl)methanone (**1a**, 20.8 mg, 0.10 mmol) and 5-(2-methoxybenzylidene)-1,3-dioxan-2-one (**2i**, 44.0 mg, 0.20 mmol) according to the **GP2** at 100 °C for 12 h. Purification by flash chromatography on silica gel using petroleum ether/EtOAc (15/1) afforded **3ai** as a white solid (26.7 mg, 69% yield).

**(Z)-3ai**:  $R_f = 0.30$  (petroleum ether/EtOAc = 15/1).  $^1\text{H}$  NMR (400 MHz,  $\text{CDCl}_3$ ):  $\delta$  8.32 (s, 1H), 7.94-7.86 (m, 4H), 7.67 (d,  $J = 7.2$  Hz, 1H), 7.60 (t,  $J = 7.2$  Hz, 1H), 7.54 (t,  $J = 7.6$  Hz, 1H), 7.32 (t,  $J = 8.0$  Hz, 1H), 7.04 (t,  $J = 7.2$  Hz, 1H), 6.90 (d,  $J = 8.4$  Hz, 1H), 6.79 (s, 1H), 4.56 (t,  $J = 4.8$  Hz, 1H), 4.51 (s, 2H), 3.82 (s, 3H), 2.97 (s, 2H), 2.90-2.85 (m, 2H), 2.80-2.76 (m, 2H) ppm.  $^{13}\text{C}$  NMR (100 MHz,  $\text{CDCl}_3$ ):  $\delta$  203.7, 157.1, 136.6, 135.3, 132.4, 131.2, 130.9, 130.6, 129.6, 129.4, 129.0, 128.5, 128.4, 127.7, 126.7, 125.3, 124.7, 120.5, 110.2, 73.2, 63.1, 55.3, 51.7, 45.7, 37.4 ppm. HRMS (ESI)  $m/z$ :  $[\text{M}+\text{H}]^+$  calcd. for  $\text{C}_{26}\text{H}_{25}\text{O}_3$ : 385.1798; found: 385.1793.



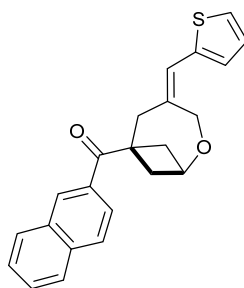

**3aj**  
 $C_{23}H_{20}O_2S$   
 $M = 360.47\text{g/mol}$

**Naphthalen-2-yl((Z)-4-(thiophen-2-ylmethylene)-2-oxabicyclo[4.1.1]octan-6-yl)methanone ((Z)-3aj):** Prepared from bicyclo[1.1.0]butan-1-yl(naphthalen-2-yl)methanone (**1a**, 20.8 mg, 0.10 mmol) and 5-(thiophen-2-ylmethylene)-1,3-dioxan-2-one (**2j**, 39.2 mg, 0.20 mmol) according to the **GP2** at 100 °C for 12 h. Purification by flash chromatography on silica gel using petroleum ether/EtOAc (15/1) afforded **3aj** as a white solid (12.5 mg, 35% yield).

**(Z)-3aj:**  $R_f = 0.35$  (petroleum ether/EtOAc = 15/1).  **$^1\text{H NMR}$**  (600 MHz,  $\text{CDCl}_3$ ):  $\delta$  8.32 (s, 1H), 7.95 (d,  $J = 7.8$  Hz, 1H), 7.92-7.88 (m, 3H), 7.62 (t,  $J = 4.8$  Hz, 1H), 7.56 (t,  $J = 7.2$  Hz, 1H), 7.34 (d,  $J = 4.8$  Hz, 1H), 7.22-7.21 (m, 1H), 7.07 (t,  $J = 3.0$  Hz, 1H), 6.68 (s, 1H), 4.71 (s, 2H), 4.55 (t,  $J = 6.0$  Hz, 1H), 2.91 (s, 2H), 2.89-2.85 (m, 2H), 2.76-2.73 (m, 2H) ppm.  **$^{13}\text{C NMR}$**  (150 MHz,  $\text{CDCl}_3$ ):  $\delta$  203.6, 138.6, 136.7, 135.4, 132.4, 131.2, 130.6, 129.6, 128.6, 128.5, 128.1, 127.7, 127.3, 126.8, 126.0, 125.5, 124.6, 73.2, 62.8, 51.6, 45.8, 37.3 ppm. **HRMS** (ESI)  $m/z$ :  $[\text{M}+\text{H}]^+$  calcd. for  $\text{C}_{23}\text{H}_{21}\text{O}_2\text{S}$ : 361.1257; found: 361.1249.

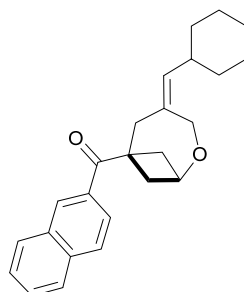

**3ak**  
 $C_{25}H_{28}O_2$   
 $M = 360.50\text{g/mol}$

**((Z)-4-(Cyclohexylmethylene)-2-oxabicyclo[4.1.1]octan-6-yl)(naphthalen-2-yl)methanone ((Z)-3ak):** Prepared from bicyclo[1.1.0]butan-1-yl(naphthalen-2-yl)methanone (**1a**, 20.8 mg,

0.10 mmol) and 5-(cyclohexylmethylene)-1,3-dioxan-2-one (**2k**, 39.3 mg, 0.20 mmol) according to the **GP2** at 100 °C for 12 h. Purification by flash chromatography on silica gel using petroleum ether/EtOAc (20/1) afforded **3ak** as a colorless oil (15.3 mg, 42% yield).

(*Z*)-**3ak**:  $R_f = 0.35$  (petroleum ether/EtOAc = 20/1).  $^1\text{H NMR}$  (400 MHz,  $\text{CDCl}_3$ ):  $\delta$  8.29 (s, 1H), 7.94-7.86 (m, 4H), 7.62-7.54 (m, 2H), 5.38 (d,  $J = 9.2$  Hz, 1H), 4.45-4.43 (m, 3H), 2.81-2.77 (m, 2H), 2.72 (s, 2H), 2.67-2.62 (m, 2H), 2.54-2.46 (m, 1H), 1.76-1.67 (m, 4H), 1.40-1.31 (m, 2H), 1.25-1.12 (m, 4H) ppm.  $^{13}\text{C NMR}$  (100 MHz,  $\text{CDCl}_3$ ):  $\delta$  203.9, 140.6, 135.3, 132.40, 132.36, 131.4, 130.6, 129.6, 128.5, 128.4, 127.7, 126.7, 124.7, 72.7, 61.9, 51.4, 45.5, 37.1, 36.8, 33.7, 25.9, 25.8 ppm. **HRMS** (ESI)  $m/z$ :  $[\text{M}+\text{H}]^+$  calcd. for  $\text{C}_{25}\text{H}_{29}\text{O}_2$ : 361.2162; found: 361.2157.

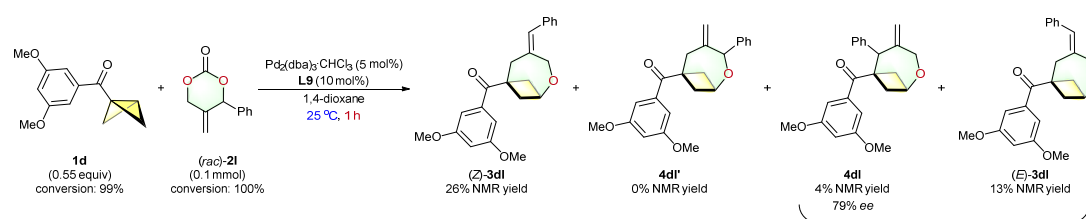

**Note:** In the presence of the Pd catalyst, compound **2l** underwent rapid decomposition.

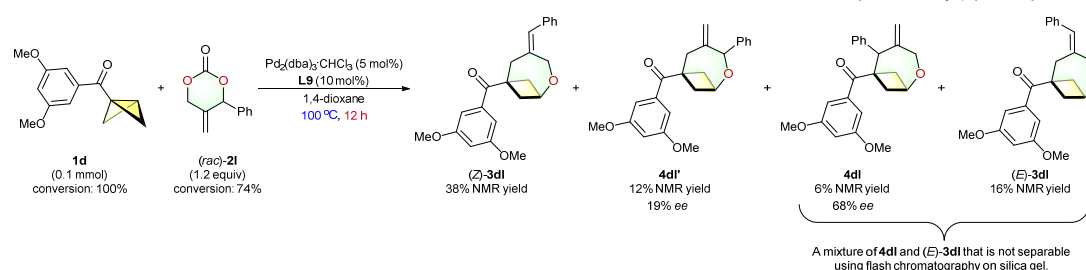

### Scheme 3. Proposed mechanism for the reaction involving **1d** and **2l**.

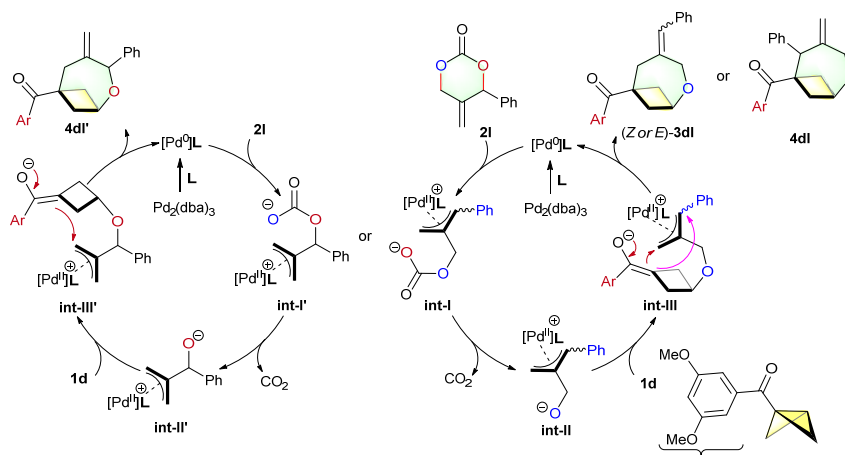

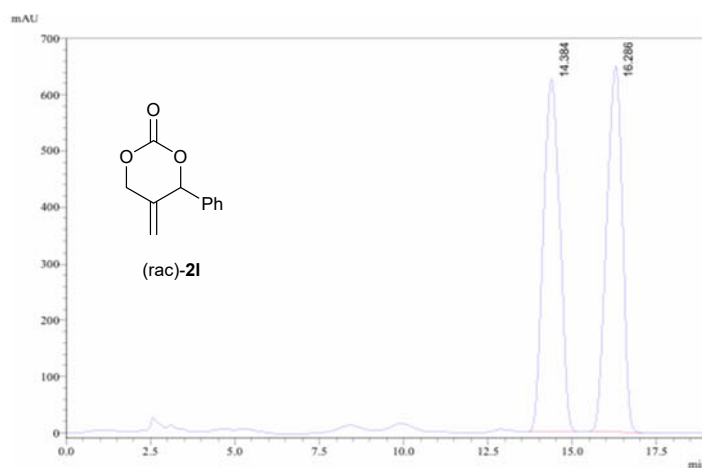

Detector A Channel 2 220nm

| Peak#        | Ret. Time [min] | Peak Start [min] | Height [mAU]   | Area [mAU*min]  | Area%          |
|--------------|-----------------|------------------|----------------|-----------------|----------------|
| 1            | 14.384          | 13.708           | 625062         | 21247750        | 50.188         |
| 2            | 16.286          | 15.492           | 649358         | 21088443        | 49.812         |
| <b>Total</b> |                 |                  | <b>1274420</b> | <b>42336193</b> | <b>100.000</b> |

The unreacted ADTMC 2I was obtained with an enantiomeric excess of 1%

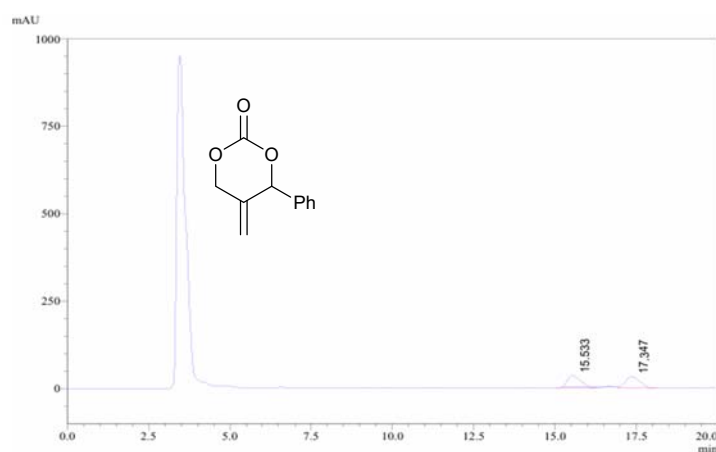

Detector A Channel 2 220nm

| Peak#        | Ret. Time [min] | Peak Start [min] | Height [mAU] | Area [mAU*min] | Area%          |
|--------------|-----------------|------------------|--------------|----------------|----------------|
| 1            | 15.533          | 15.042           | 35696        | 1023688        | 50.572         |
| 2            | 17.347          | 16.917           | 32857        | 1000530        | 49.428         |
| <b>Total</b> |                 |                  | <b>68553</b> | <b>2024218</b> | <b>100.000</b> |

HPLC analysis (Chiralpak AD-H,  $i$ PrOH/hexane = 10/90, 1.0 mL/min, 220 nm;  $t_r$  (major) = 15.53 min,  $t_r$  (minor) = 17.35 min) gave the isomeric composition of the unreacted ADTMC 2I: 1% ee.

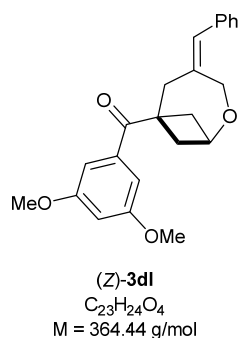

**4-((Z)-benzylidene)-2-oxabicyclo[4.1.1]octan-6-yl(3,5-dimethoxyphenyl)methanone ((Z)-**3dl**):**

Prepared from bicyclo[1.1.0]butan-1-yl(3,5-dimethoxyphenyl)methanone (**1d**, 21.8 mg, 0.10 mmol) and 5-methylene-4-phenyl-1,3-dioxan-2-one (**2l**, 22.8 mg, 0.12 mmol) according to the **GP1** at 100 °C for 12 h. Purification by flash chromatography on silica gel using petroleum ether/EtOAc (15/1) afforded (Z)-**3dl** as a white solid (9.2 mg, 25% yield).

(Z)-**3dl**:  $R_f$  = 0.20 (petroleum ether/EtOAc = 15/1).  $^1H$  NMR (400 MHz,  $CDCl_3$ ):  $\delta$  7.44-7.37 (m, 4H), 7.31-7.28 (m, 1H), 6.97 (s, 2H), 6.66 (s, 1H), 6.64 (s, 1H), 4.52 (t,  $J$  = 6.8 Hz, 1H), 4.47 (s, 2H), 3.82 (s, 6H), 2.84 (s, 2H), 2.82-2.78 (m, 2H), 2.70-2.66 (m, 2H) ppm.  $^{13}C$  NMR (100 MHz,  $CDCl_3$ ):  $\delta$  203.3, 160.8, 137.1, 136.5, 135.8, 133.4, 129.0, 128.4, 127.3, 106.8, 105.0, 73.1, 62.7, 55.5, 51.6, 45.5, 37.3 ppm. HRMS (ESI)  $m/z$ :  $[M+Na]^+$  calcd. for  $C_{23}H_{24}O_4Na$ : 387.1567; found: 387.1560.

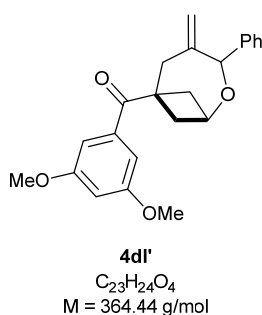

**(3,5-dimethoxyphenyl)(4-methylene-3-phenyl-2-oxabicyclo[4.1.1]octan-6-yl)methanone (4dl')**:

Prepared from bicyclo[1.1.0]butan-1-yl(3,5-dimethoxyphenyl)methanone (**1d**, 21.8 mg, 0.10 mmol) and 5-methylene-4-phenyl-1,3-dioxan-2-one (**2l**, 22.8 mg, 0.12 mmol) according to the **GP1** at 100 °C for 12 h. Purification by flash chromatography on silica

gel using petroleum ether/EtOAc (20/1) afforded **4dl'** as a white solid (3.1 mg, 9% yield, 19% ee).

**4dl'**:  $R_f = 0.25$  (petroleum ether/EtOAc = 20/1).  $^1\text{H NMR}$  (400 MHz,  $\text{CDCl}_3$ ):  $\delta$  7.43 (d,  $J = 6.8$  Hz, 2H), 7.37 (t,  $J = 6.8$  Hz, 2H), 7.30 (d,  $J = 6.8$  Hz, 1H), 6.97 (s, 2H), 6.64 (s, 1H), 5.53 (s, 1H), 5.15 (s, 1H), 4.73 (s, 1H), 4.62 (t,  $J = 5.2$  Hz, 1H), 3.82 (s, 6H), 2.96-2.86 (m, 3H), 2.80-2.75 (m, 1H), 2.73-2.68 (m, 1H), 2.53-2.49 (m, 1H) ppm.  $^{13}\text{C NMR}$  (150 MHz,  $\text{CDCl}_3$ ):  $\delta$  203.1, 160.8, 147.7, 140.5, 135.8, 128.1, 127.4, 127.1, 120.7, 106.7, 105.2, 77.7, 72.6, 55.5, 50.9, 44.7, 39.5, 35.2 ppm. **HRMS** (ESI)  $m/z$ :  $[\text{M}+\text{Na}]^+$  calcd. for  $\text{C}_{23}\text{H}_{24}\text{O}_4\text{Na}$ : 387.1567; found: 387.1559.

HPLC analysis of **4dl'** (Chiralpak AD-H,  $i\text{PrOH}$ /hexane = 10/90, 1.0 mL/min, 254 nm;  $t_r$  (major) = 6.96 min,  $t_r$  (minor) = 8.30 min) gave the isomeric composition of the product: 19% ee.

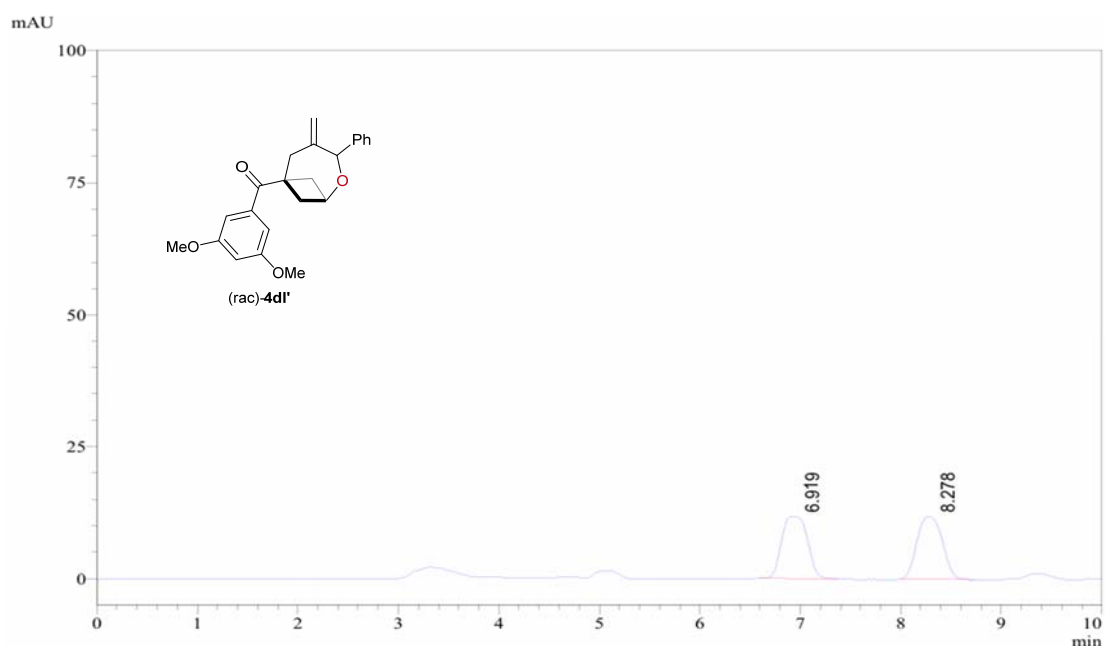

Detector A Channel 1 254nm

| Peak#        | Ret. Time [min] | Peak Start [min] | Height [mAU] | Area [mAU*min] | Area%          |
|--------------|-----------------|------------------|--------------|----------------|----------------|
| 1            | 6.919           | 6.592            | 11714        | 207631         | 50.218         |
| 2            | 8.278           | 8.000            | 11820        | 205826         | 49.782         |
| <b>Total</b> |                 |                  | <b>23534</b> | <b>413457</b>  | <b>100.000</b> |

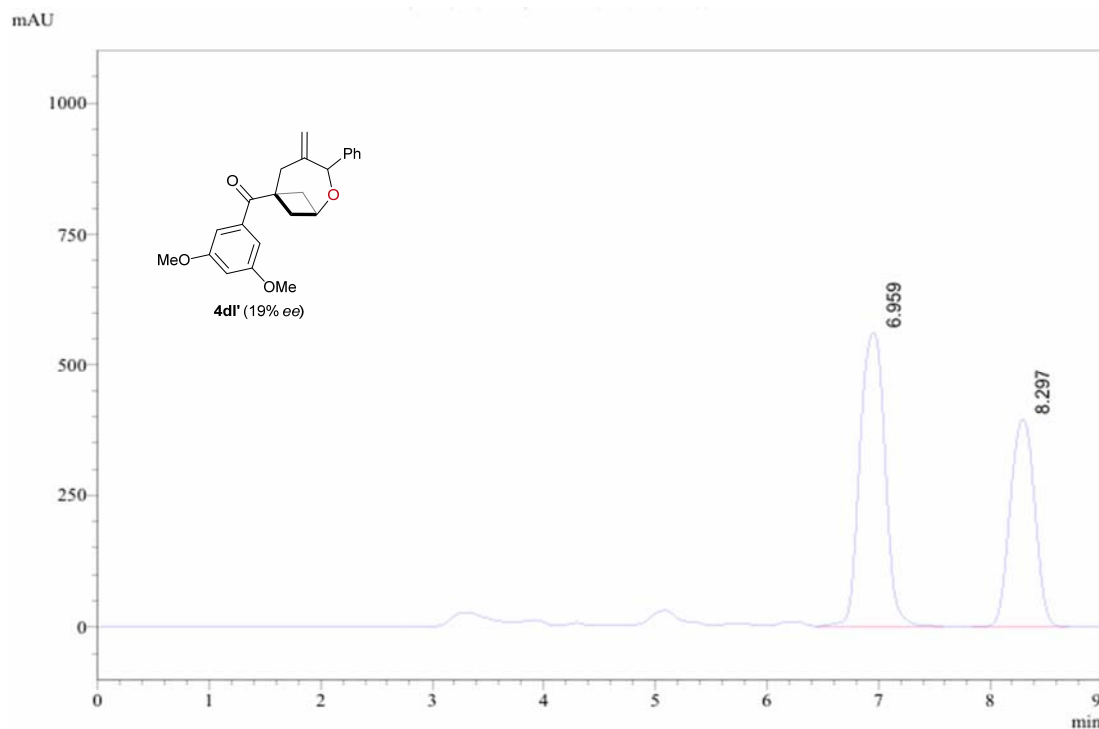

Detector A Channel 1 254nm

| Peak# | Ret. Time [min] | Peak Start [min] | Height [mAU] | Area [mAU*min] | Area%   |
|-------|-----------------|------------------|--------------|----------------|---------|
| 1     | 6.957           | 6.500            | 123607       | 1930165        | 59.514  |
| 2     | 8.296           | 7.942            | 86493        | 1313029        | 40.486  |
| Total |                 |                  | 210100       | 3243194        | 100.000 |

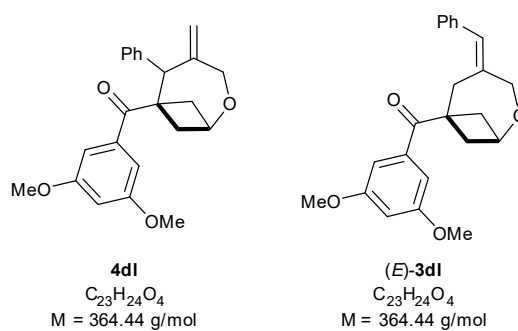

A mixture of **4dl** and **(E)-3dl** that is not separable using flash chromatography on silica gel.

**(3,5-dimethoxyphenyl)(4-methylene-5-phenyl-2-oxabicyclo[4.1.1]octan-6-yl)methanone (4dl)** and **4-((E)-benzylidene)-2-oxabicyclo[4.1.1]octan-6-yl(3,5-dimethoxyphenyl)methanone ((E)-3dl)**: Prepared from bicyclo[1.1.0]butan-1-yl(3,5-dimethoxyphenyl)methanone (**1d**, 21.8 mg, 0.10 mmol) and 5-methylene-4-phenyl-1,3-dioxan-2-one (**2l**, 22.8 mg, 0.12 mmol) according to the **GP1** at 100 °C for 12 h. Purification by flash chromatography on silica gel using petroleum ether/EtOAc (20/1) afforded a mixture of **4dl** and **(E)-3dl** as a

colorless oil that is not separable using flash chromatography on silica gel (8.2 mg, 23% combined isolated yield).

**4dl:**  $R_f = 0.20$  (petroleum ether/EtOAc = 20/1).  **$^1\text{H NMR}$**  (400 MHz,  $\text{CDCl}_3$ ):  $\delta$  7.29-7.26 (m, 2H), 7.22-7.18 (m, 2H), 6.94-6.92 (m, 1H), 6.62 (s, 2H), 6.54 (s, 1H), 5.42 (s, 1H), 4.89 (s, 1H), 4.52 (s, 2H), 4.46 (t,  $J = 5.2$  Hz, 1H), 4.29 (s, 1H), 3.74 (s, 6H), 3.24-3.19 (m, 1H), 2.92-2.87 (m, 1H), 2.84-2.79 (m, 1H), 2.37-2.31 (m, 1H) ppm. **HRMS** (ESI)  $m/z$ :  $[\text{M}+\text{H}]^+$  calcd. for  $\text{C}_{23}\text{H}_{25}\text{O}_4$ : 365.1747; found: 365.1739.

**(E)-3dl:**  $R_f = 0.20$  (petroleum ether/EtOAc = 20/1).  **$^1\text{H NMR}$**  (400 MHz,  $\text{CDCl}_3$ ):  $\delta$  7.29-7.26 (m, 2H), 7.22-7.18 (m, 2H), 7.15-7.13 (m, 1H), 6.89 (s, 1H), 6.81 (s, 2H), 6.56 (s, 1H), 4.52 (s, 2H), 4.46 (t,  $J = 5.2$  Hz, 1H), 3.65 (s, 6H), 2.98 (s, 2H), 2.76-2.72 (m, 2H), 2.56-2.52 (m, 2H) ppm. **HRMS** (ESI)  $m/z$ :  $[\text{M}+\text{H}]^+$  calcd. for  $\text{C}_{23}\text{H}_{25}\text{O}_4$ : 365.1747; found: 365.1736.

**$^{13}\text{C NMR}$**  (150 MHz,  $\text{CDCl}_3$ ):  $\delta$  203.3 (for **(E)-3dl**), 203.1 (for **4dl**), 160.6 (for **(E)-3dl**), 160.4 (for **4dl**), 147.9, 139.6, 137.8, 136.9, 136.5, 135.7, 133.8, 128.7, 128.5, 128.3, 128.2, 127.1, 126.7, 121.4, 106.5, 106.1, 105.5, 104.3, 72.7, 72.3, 70.7, 70.5, 68.5, 55.5, 55.4, 55.2, 51.1, 40.4, 37.1, 36.8 ppm.

HPLC analysis of **4dl** (Chiralpak AD-H,  $i\text{PrOH}$ /hexane = 10/90, 1.0 mL/min, 254 nm;  $t_r$  (major) = 7.73 min,  $t_r$  (minor) = 9.75 min) gave the isomeric composition of the product: 68% ee.

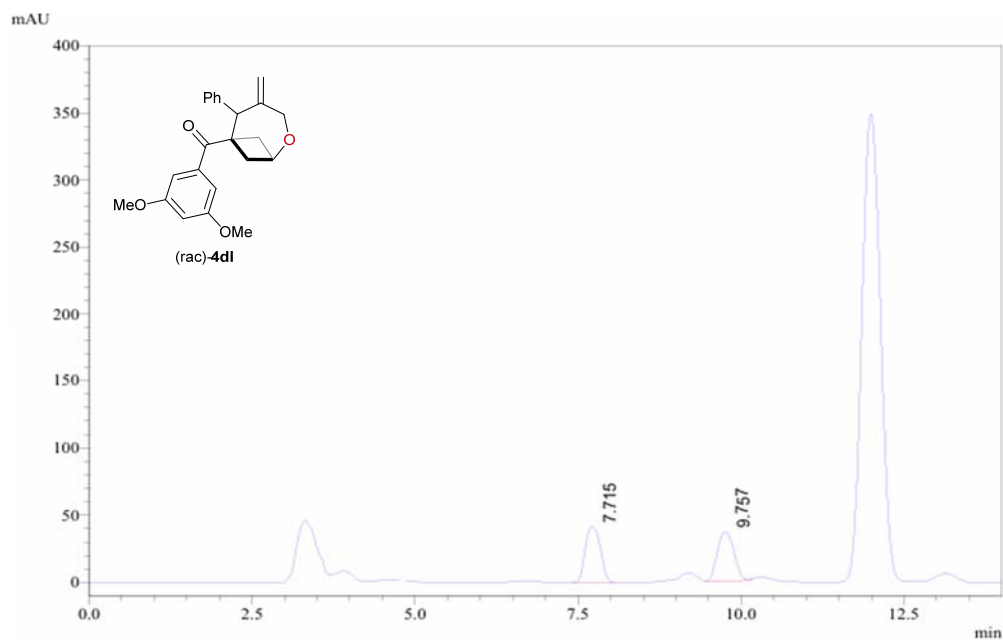

Detector A Channel 2 220nm

| Peak#        | Ret. Time [min] | Peak Start [min] | Height [mAU] | Area [mAU*min] | Area%          |
|--------------|-----------------|------------------|--------------|----------------|----------------|
| 1            | 7.715           | 7.417            | 41258        | 668142         | 50.296         |
| 2            | 9.757           | 9.458            | 36709        | 660269         | 49.704         |
| <b>Total</b> |                 |                  | <b>77967</b> | <b>1328412</b> | <b>100.000</b> |

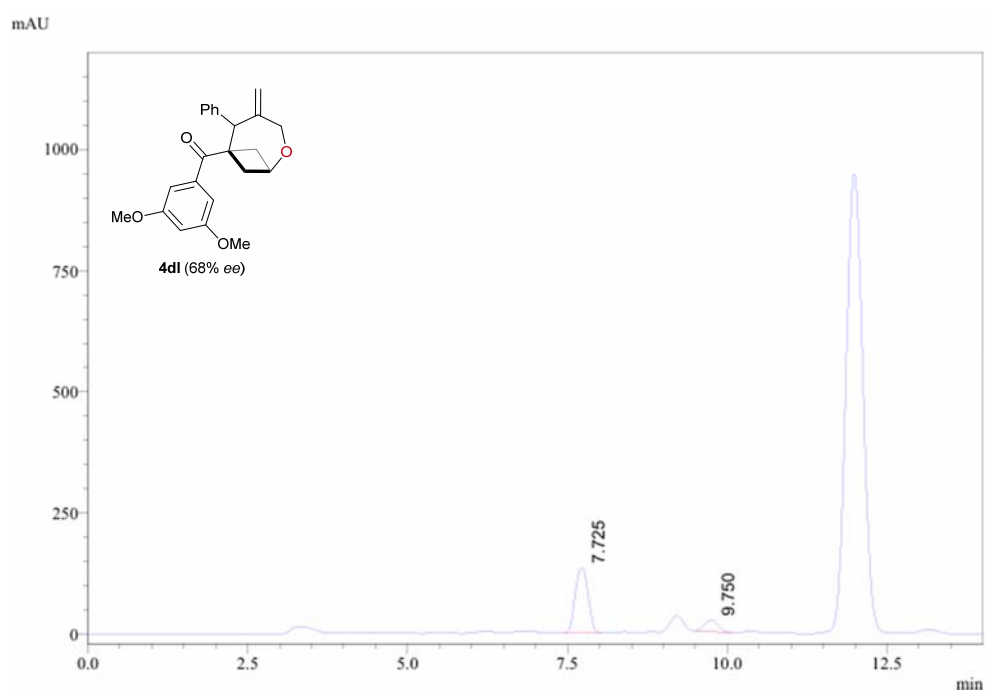

Detector A Channel 1 254nm

| Peak#        | Ret. Time [min] | Peak Start [min] | Height [mAU]  | Area [mAU*min] | Area%          |
|--------------|-----------------|------------------|---------------|----------------|----------------|
| 1            | 7.725           | 7.450            | 134421        | 1881283        | 83.934         |
| 2            | 9.750           | 9.500            | 23130         | 360092         | 16.066         |
| <b>Total</b> |                 |                  | <b>157551</b> | <b>2241375</b> | <b>100.000</b> |



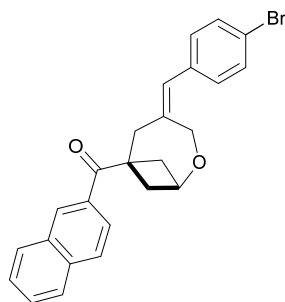

**3am**  
 $C_{25}H_{21}BrO_2$   
 $M = 433.35 \text{ g/mol}$

**(4-((Z)-4-bromobenzylidene)-2-oxabicyclo[4.1.1]octan-6-yl)(naphthalen-2-yl)methanone ((Z)-3am):** Prepared from bicyclo[1.1.0]butan-1-yl(naphthalen-2-yl)methanone (**1a**, 20.8 mg, 0.10 mmol) and 5-(4-bromobenzylidene)-1,3-dioxan-2-one (**2m**, 53.8 mg, 0.20 mmol) according to the **GP2** at 100 °C for 12 h. Purification by flash chromatography on silica gel using petroleum ether/EtOAc (20/1) afforded **3am** as a white solid (9.2 mg, 21% yield).

**(Z)-3am:**  $R_f = 0.30$  (petroleum ether/EtOAc = 20/1).  **$^1H$  NMR** (600 MHz,  $CDCl_3$ ):  $\delta$  8.32 (s, 1H), 7.95 (d,  $J = 8.4$  Hz, 1H), 7.91 (s, 2H), 7.89 (d,  $J = 7.8$  Hz, 1H), 7.62 (t,  $J = 7.2$  Hz, 1H), 7.56 (t,  $J = 7.8$  Hz, 1H), 7.53 (d,  $J = 8.4$  Hz, 2H), 7.34 (d,  $J = 8.4$  Hz, 2H), 6.61 (s, 1H), 4.57 (t,  $J = 6.0$  Hz, 1H), 4.48 (s, 2H), 2.91-2.89 (m, 4H), 2.76 (d,  $J = 11.4$  Hz, 2H) ppm.  **$^{13}C$  NMR** (150 MHz,  $CDCl_3$ ):  $\delta$  203.5, 138.1, 135.4, 135.3, 132.4, 132.2, 131.5, 131.1, 130.64, 130.61, 129.6, 128.6, 128.5, 127.8, 126.8, 124.6, 121.4, 73.3, 62.6, 51.6, 45.5, 37.3 ppm. **HRMS** (ESI)  $m/z$ :  $[M+H]^+$  calcd. for  $C_{25}H_{22}BrO_2$ : 433.0803; found: 433.0792.

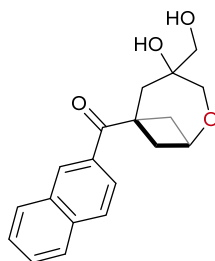

**6**  
 $C_{19}H_{20}O_4$   
 $M = 312.37 \text{ g/mol}$

**(4-Hydroxy-4-(hydroxymethyl)-2-oxabicyclo[4.1.1]octan-6-yl)(naphthalen-2-yl)**

**methanone (6):**  $R_f = 0.20$  (petroleum ether/EtOAc = 1/2).  $^1\text{H NMR}$  (400 MHz,  $\text{CDCl}_3$ ):  $\delta$  8.41 (s, 1H), 7.95 (t,  $J = 7.2$  Hz, 2H), 7.87 (t,  $J = 8.4$  Hz, 2H), 7.60 (t,  $J = 7.2$  Hz, 1H), 7.54 (t,  $J = 8.0$  Hz, 1H), 4.55 (t,  $J = 5.6$  Hz, 1H), 4.16 (d,  $J = 13.6$  Hz, 1H), 4.03 (d,  $J = 13.6$  Hz, 1H), 3.51 (d,  $J = 11.2$  Hz, 1H), 3.41 (d,  $J = 11.2$  Hz, 1H), 3.23-3.16 (m, 2H), 2.80 (dd,  $J = 14.0$  Hz, 6.0 Hz, 1H), 2.69 (dd,  $J = 12.4$  Hz, 5.6 Hz, 1H), 2.59 (dd,  $J = 13.6$  Hz, 7.6 Hz, 1H), 2.39 (d,  $J = 14.4$  Hz, 2H), 1.75 (d,  $J = 14.8$  Hz, 1H) ppm.  $^{13}\text{C NMR}$  (100 MHz,  $\text{CDCl}_3$ ):  $\delta$  203.0, 135.4, 132.4, 130.9, 130.8, 129.7, 128.6, 128.5, 127.7, 126.7, 124.7, 76.2, 73.0, 67.7, 67.4, 53.2, 41.8, 40.6, 32.3 ppm. **HRMS** (ESI)  $m/z$ :  $[\text{M}+\text{Na}]^+$  calcd. for  $\text{C}_{19}\text{H}_{21}\text{O}_4\text{Na}$ : 335.1254; found: 335.1251.

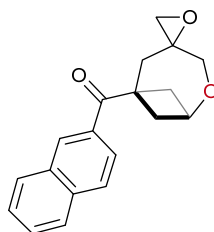

**7**  
 $\text{C}_{19}\text{H}_{18}\text{O}_3$   
 $M = 294.35$  g/mol

**Naphthalen-2-yl(5-oxaspiro[bicyclo[4.1.1]octane-3,2'-oxiran]-1-yl)methanone (7):**

$R_f = 0.20$  (petroleum ether/EtOAc = 3/1).  $^1\text{H NMR}$  (600 MHz,  $\text{CDCl}_3$ ):  $\delta$  8.36 (s, 1H), 7.96 (d,  $J = 7.8$  Hz, 1H), 7.92-7.86 (m, 3H), 7.61 (t,  $J = 7.2$  Hz, 1H), 7.56 (t,  $J = 7.2$  Hz, 1H), 4.56 (t,  $J = 6.6$  Hz, 1H), 4.31 (d,  $J = 13.2$  Hz, 1H), 3.72 (d,  $J = 13.2$  Hz, 1H), 3.03-2.95 (m, 2H), 2.91 (dd,  $J = 12.6$  Hz, 6.0 Hz, 1H), 2.83 (d,  $J = 4.2$  Hz, 1H), 2.78 (d,  $J = 4.2$  Hz, 1H), 2.64 (dd,  $J = 13.8$  Hz, 7.2 Hz, 1H), 2.44 (d,  $J = 14.4$  Hz, 1H), 2.14 (d,  $J = 14.4$  Hz, 1H) ppm.  $^{13}\text{C NMR}$  (150 MHz,  $\text{CDCl}_3$ ):  $\delta$  202.8, 135.3, 132.3, 130.9, 130.7, 129.7, 128.6, 128.5, 127.7, 126.8, 124.6, 72.3, 69.1, 57.8, 52.0, 51.9, 42.4, 39.4, 34.6 ppm. **HRMS** (ESI)  $m/z$ :  $[\text{M}+\text{H}]^+$  calcd. for  $\text{C}_{19}\text{H}_{19}\text{O}_3$ : 295.1329; found: 295.1327.

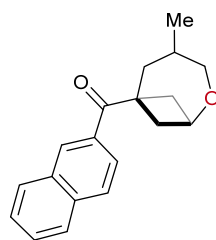

**8**  
 $C_{19}H_{20}O_2$   
 $M = 280.37 \text{ g/mol}$

**(4-Methyl-2-oxabicyclo[4.1.1]octan-6-yl)(naphthalen-2-yl)methanone (8):**  $R_f = 0.30$  (petroleum ether/EtOAc = 20/1).  $^1\text{H NMR}$  (400 MHz,  $\text{CDCl}_3$ ):  $\delta$  8.32 (s, 1H), 7.96-7.85 (m, 4H), 7.61-7.53 (m, 2H), 4.44 (t,  $J = 5.6 \text{ Hz}$ , 1H), 3.90-3.79 (m, 2H), 2.85-2.80 (m, 1H), 2.76-2.72 (m, 1H), 2.63-2.53 (m, 3H), 2.25-2.20 (m, 1H), 1.57 (t,  $J = 12.4 \text{ Hz}$ , 1H), 0.95 (d,  $J = 6.4 \text{ Hz}$ , 3H) ppm.  $^{13}\text{C NMR}$  (100 MHz,  $\text{CDCl}_3$ ):  $\delta$  203.9, 135.3, 132.4, 131.5, 130.4, 129.5, 128.4, 128.3, 127.7, 126.7, 124.7, 72.3, 70.6, 53.0, 42.5, 40.0, 33.8, 33.6, 18.2 ppm. **HRMS** (ESI)  $m/z$ :  $[\text{M}+\text{H}]^+$  calcd. for  $C_{19}H_{21}O_2$ : 281.1536; found: 281.1535.

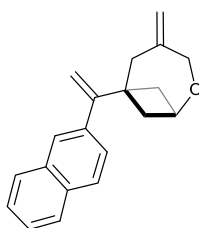

**9**  
 $C_{20}H_{20}O$   
 $M = 276.38 \text{ g/mol}$

**(4-Methylene-6-(1-(naphthalen-2-yl)vinyl)-2-oxabicyclo[4.1.1]octane (9):**  $R_f = 0.30$  (petroleum ether/EtOAc = 30/1).  $^1\text{H NMR}$  (400 MHz,  $\text{CDCl}_3$ ):  $\delta$  7.82-7.76 (m, 3H), 7.70 (s, 1H), 7.49-7.42 (m, 3H), 5.34 (s, 1H), 5.16 (s, 1H), 5.11 (s, 1H), 4.97 (s, 1H), 4.44 (t,  $J = 6.4 \text{ Hz}$ , 1H), 4.30 (s, 2H), 2.62-2.57 (m, 4H), 2.52 (d,  $J = 11.6 \text{ Hz}$ , 2H) ppm.  $^{13}\text{C NMR}$  (100 MHz,  $\text{CDCl}_3$ ):  $\delta$  156.3, 145.6, 137.8, 133.2, 132.5, 128.1, 127.6, 127.5, 126.1, 125.84, 125.79, 125.5, 118.3, 111.9, 71.8, 68.7, 46.9, 45.9, 38.4 ppm. **HRMS** (ESI)  $m/z$ :  $[\text{M}+\text{H}]^+$  calcd. for  $C_{20}H_{21}O$ : 277.1587; found: 277.1584.

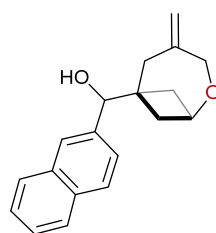

**10**  
 $C_{19}H_{20}O_2$   
 $M = 280.37 \text{ g/mol}$

**(4-Methylene-2-oxabicyclo[4.1.1]octan-6-yl)(naphthalen-2-yl)methanol (10):**  $R_f = 0.25$  (petroleum ether/EtOAc = 5/1).  $^1\text{H NMR}$  (400 MHz,  $\text{CDCl}_3$ ):  $\delta$  7.83-7.78 (m, 3H), 7.72 (s, 1H), 7.50-7.45 (m, 2H), 7.39 (d,  $J = 8.4 \text{ Hz}$ , 1H), 5.06 (s, 1H), 4.90 (s, 1H), 4.68 (s, 1H), 4.40 (t,  $J = 6.4 \text{ Hz}$ , 1H), 4.12 (s, 2H), 2.55-2.48 (m, 2H), 2.29 (d,  $J = 14.0 \text{ Hz}$ , 2H), 2.15-2.06 (m, 2H), 2.01-1.96 (m, 1H) ppm.  $^{13}\text{C NMR}$  (100 MHz,  $\text{CDCl}_3$ ):  $\delta$  145.3, 138.9, 133.0, 132.9, 127.9, 127.8, 127.6, 126.2, 125.9, 125.4, 124.6, 118.2, 79.6, 71.9, 68.4, 45.1, 40.9, 34.0, 33.6 ppm. **HRMS** (ESI)  $m/z$ :  $[\text{M}+\text{Na}]^+$  calcd. for  $C_{19}H_{20}O_2\text{Na}$ : 303.1356; found: 303.1357.

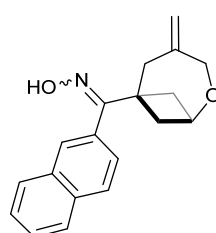

**11**  
 $C_{19}H_{19}NO_2$   
 $M = 293.37 \text{ g/mol}$

**(4-Methylene-2-oxabicyclo[4.1.1]octan-6-yl)(naphthalen-2-yl)methanone oxime (11):** **The major isomer:**  $R_f = 0.30$  (petroleum ether/EtOAc = 5/1).  $^1\text{H NMR}$  (400 MHz,  $\text{CDCl}_3$ ):  $\delta$  7.86-7.80 (m, 4H), 7.52-7.46 (m, 3H), 5.29 (s, 1H), 5.18 (s, 1H), 4.37-4.34 (m, 3H), 3.08 (s, 2H), 2.67-2.62 (m, 2H), 2.45-2.40 (m, 2H) ppm.  $^{13}\text{C NMR}$  (100 MHz,  $\text{CDCl}_3$ ):  $\delta$  164.2, 144.9, 133.3, 132.9, 132.3, 128.4, 128.1, 127.7, 126.6, 126.43, 126.36, 124.3, 119.1, 73.5, 68.7, 44.4, 42.2, 38.8 ppm. **HRMS** (ESI)  $m/z$ :  $[\text{M}+\text{H}]^+$  calcd. for  $C_{19}H_{20}NO_2$ : 294.1489; found: 294.1483.

**The minor isomer:**  $R_f = 0.25$  (petroleum ether/EtOAc = 5/1).  $^1\text{H NMR}$  (400 MHz,  $\text{CDCl}_3$ ):  $\delta$  8.19 (broad s, 1H), 7.91-7.86 (m, 3H), 7.71 (s, 1H), 7.55-7.50 (m, 2H), 7.34

(d,  $J = 8.4$  Hz, 1H), 5.14 (s, 1H), 4.94 (s, 1H), 4.43 (t,  $J = 6.4$  Hz, 1H), 4.22 (s, 2H), 2.80-2.75 (m, 2H), 2.56 (s, 2H), 2.36-2.33 (m, 2H) ppm.  $^{13}\text{C NMR}$  (100 MHz,  $\text{CDCl}_3$ ):  $\delta$  163.4, 144.5, 133.1, 132.9, 129.9, 128.3, 128.0, 127.8, 126.70, 126.6, 126.4, 125.4, 119.2, 72.2, 68.5, 45.3, 44.2, 36.2 ppm. **HRMS** (ESI)  $m/z$ :  $[\text{M}+\text{H}]^+$  calcd. for  $\text{C}_{19}\text{H}_{20}\text{NO}_2$ : 294.1489; found: 294.1481.

## 10 Crystal Structure of 3ab

Note: The thermal ellipsoids are 50% probability level. The crystals are grown by slow solvent ( $\text{CH}_2\text{Cl}_2/n\text{-Hexane}/\text{Et}_2\text{O}$ ) evaporation at room temperature. CCDC number of **3ab** is 2352144.

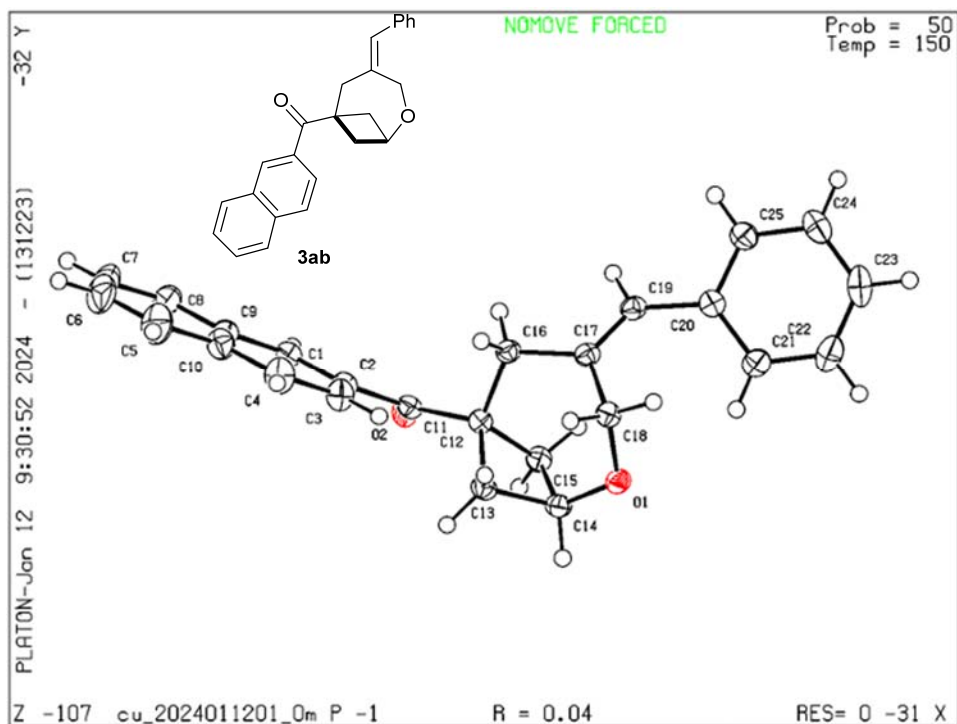**Datablock: cu\_2024011201\_0m**

Bond precision: C-C = 0.0018 Å Wavelength=1.54178

Cell: a=6.0617(2) b=11.9065(3) c=14.3836(4)  
alpha=113.136(1) beta=99.600(1) gamma=90.492(1)

Temperature: 150 K

|                        | Calculated   | Reported     |
|------------------------|--------------|--------------|
| Volume                 | 938.11(5)    | 938.11(5)    |
| Space group            | P -1         | P -1         |
| Hall group             | -P 1         | -P 1         |
| Moiety formula         | C25 H22 O2   | C25 H22 O2   |
| Sum formula            | C25 H22 O2   | C25 H22 O2   |
| Mr                     | 354.43       | 354.42       |
| Dx, g cm <sup>-3</sup> | 1.255        | 1.255        |
| Z                      | 2            | 2            |
| Mu (mm <sup>-1</sup> ) | 0.612        | 0.612        |
| F000                   | 376.0        | 376.0        |
| F000'                  | 377.06       |              |
| h,k,lmax               | 7,14,17      | 7,14,17      |
| Nref                   | 3444         | 3424         |
| Tmin, Tmax             | 0.852, 0.975 | 0.818, 0.975 |
| Tmin'                  | 0.811        |              |

Correction method= # Reported T Limits: Tmin=0.818 Tmax=0.975  
AbsCorr = MULTI-SCAN

Data completeness= 0.994 Theta(max)= 68.263

R(reflections)= 0.0355( 3062) wR2(reflections)=  
0.0958( 3424)

S = 1.074 Npar= 245

## 11 NMR Spectra

### $^1\text{H}$ and $^{13}\text{C}$ NMR Spectra for Compound 3aa:

$^1\text{H}$  NMR (600 MHz,  $\text{CDCl}_3$ )

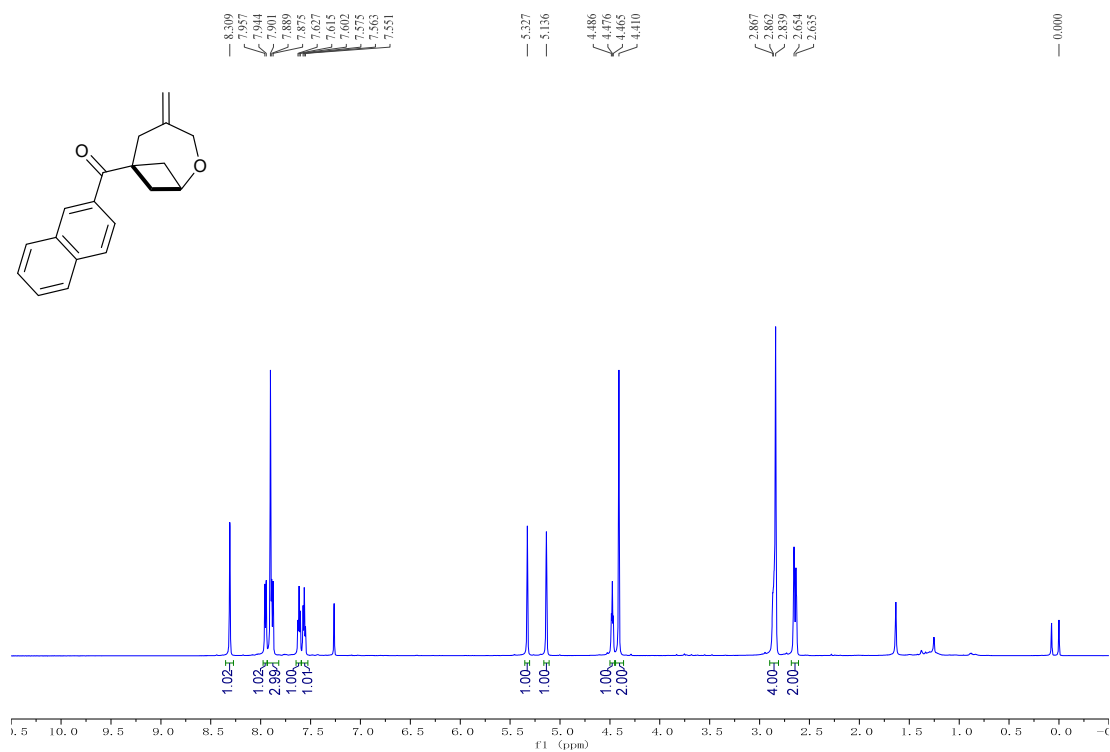

$^{13}\text{C}$  NMR (150 MHz,  $\text{CDCl}_3$ )

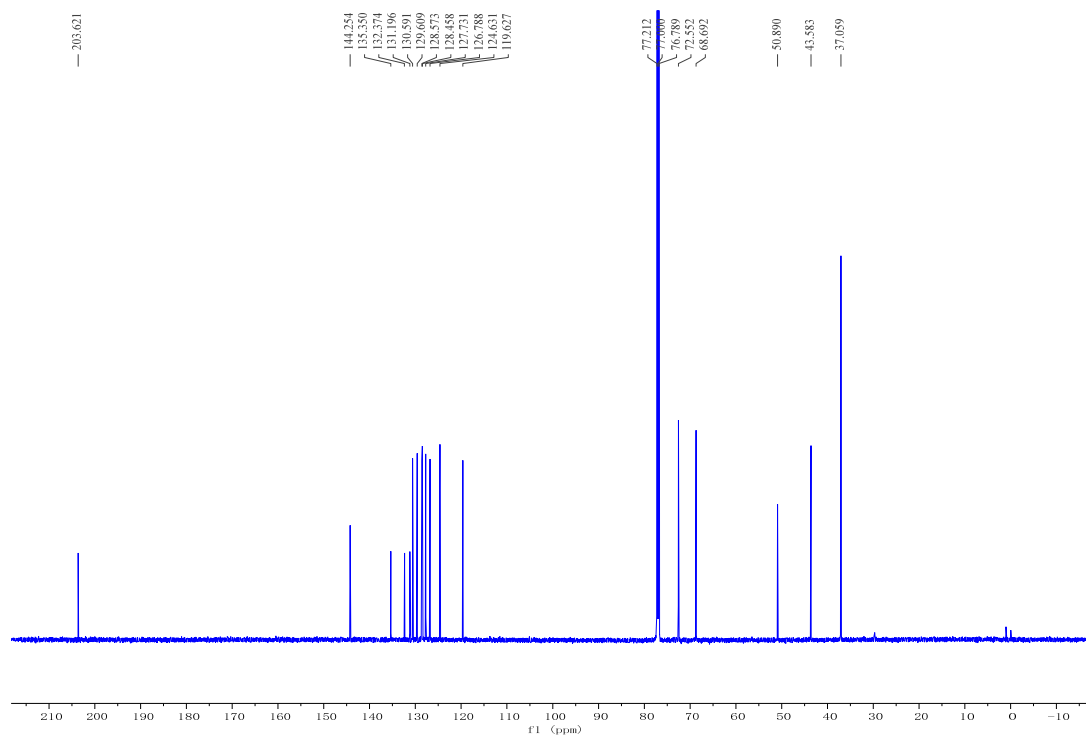

**$^1\text{H}$  and  $^{13}\text{C}$  NMR Spectra for Compound 3ba:** **$^1\text{H}$  NMR (600 MHz,  $\text{CDCl}_3$ )**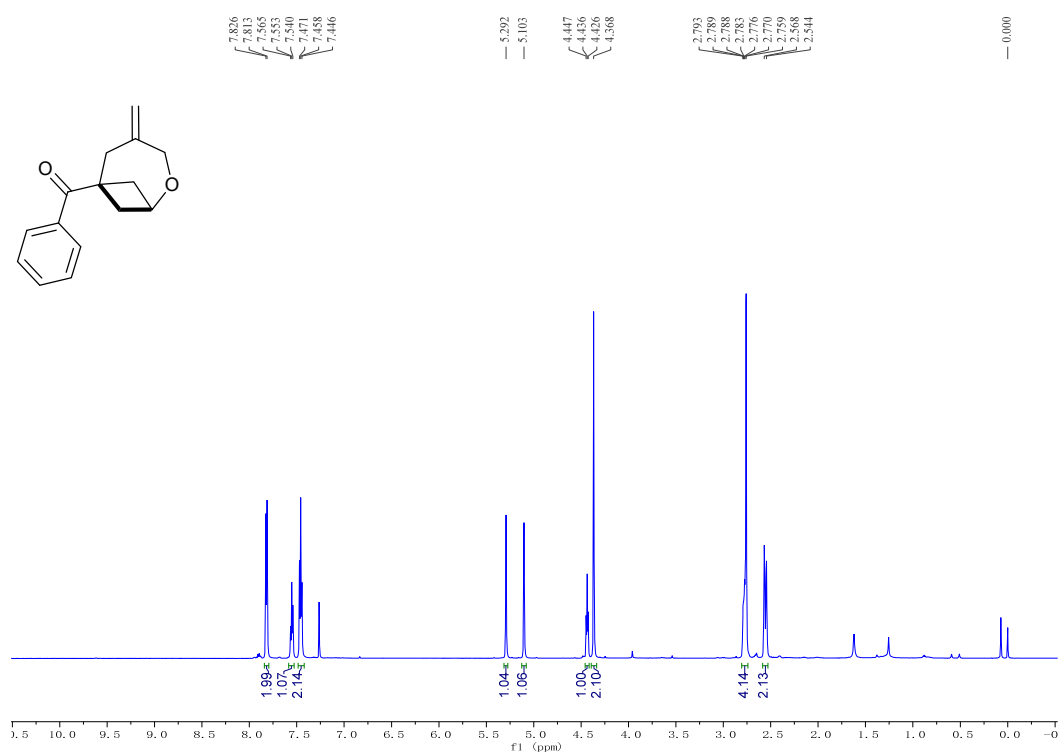 **$^{13}\text{C}$  NMR (150 MHz,  $\text{CDCl}_3$ )**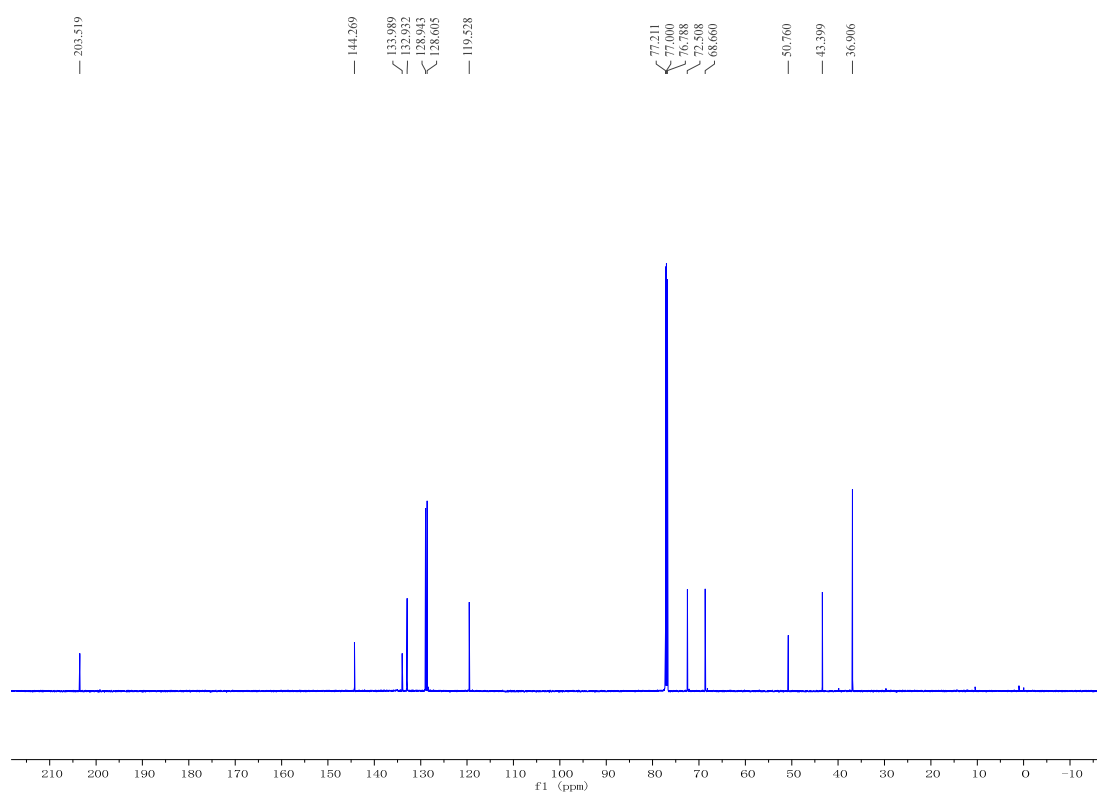



**$^1\text{H}$ ,  $^{13}\text{C}$  NMR and  $^{19}\text{F}$  NMR Spectra for Compound 3ca:** $^1\text{H}$  NMR (400 MHz,  $\text{CDCl}_3$ )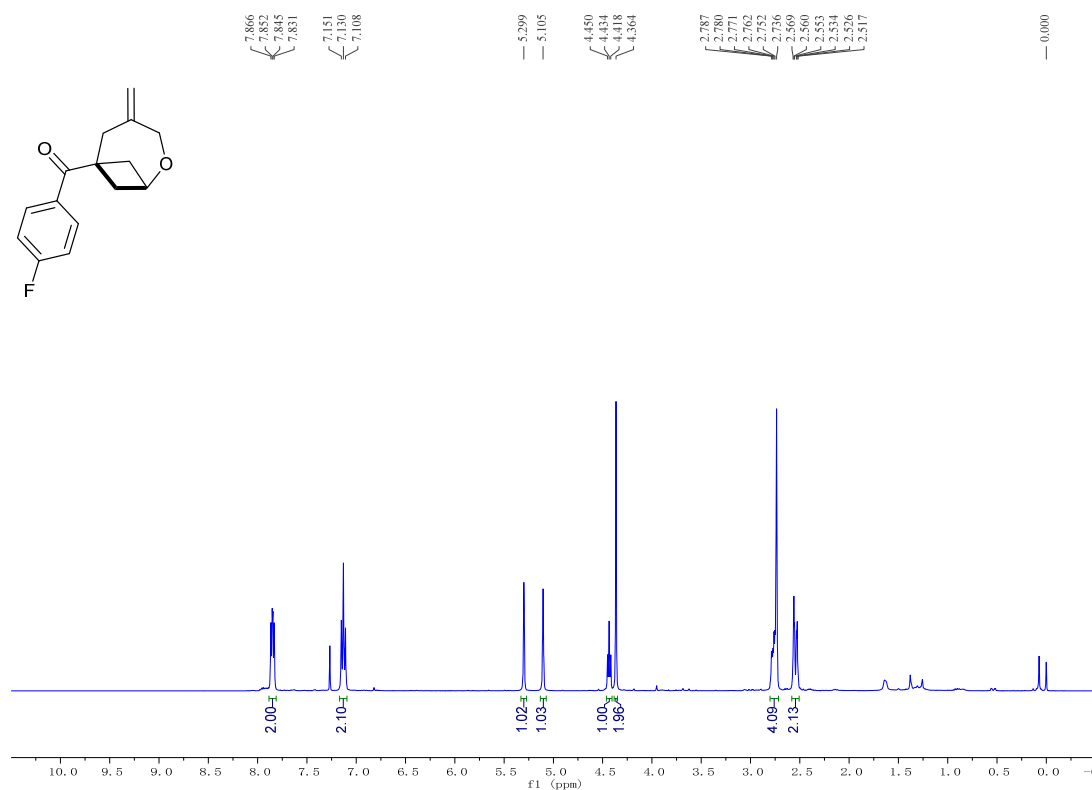 $^{13}\text{C}$  NMR (150 MHz,  $\text{CDCl}_3$ )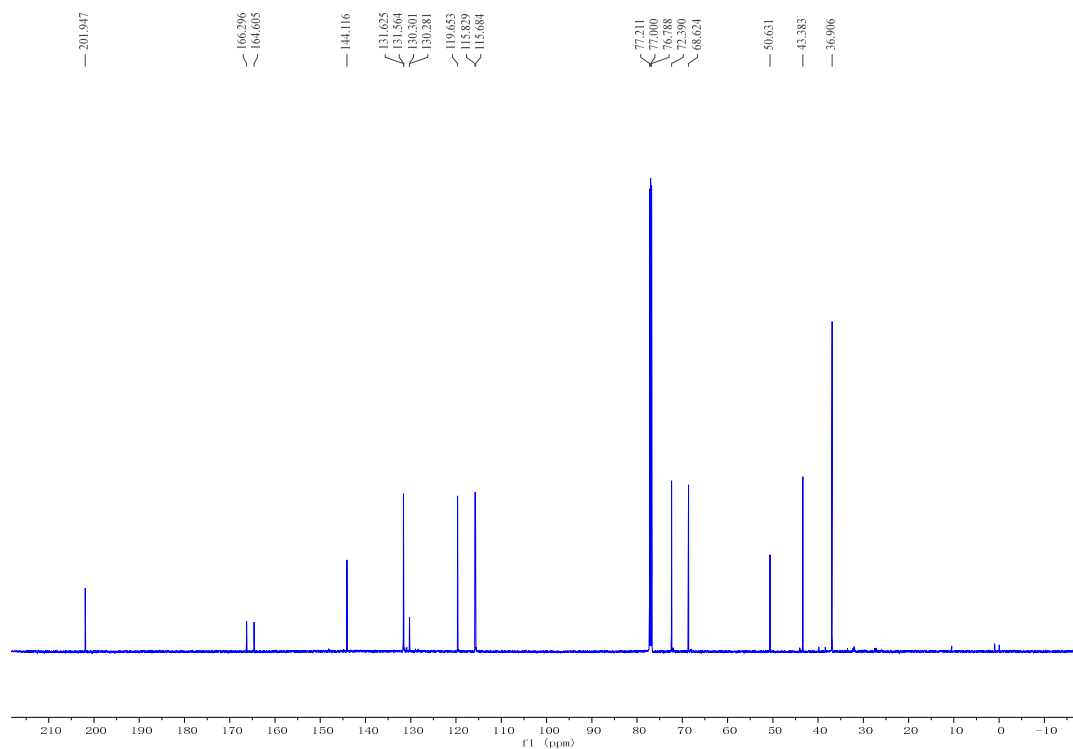

$^{19}\text{F}$  NMR (376 MHz,  $\text{CDCl}_3$ )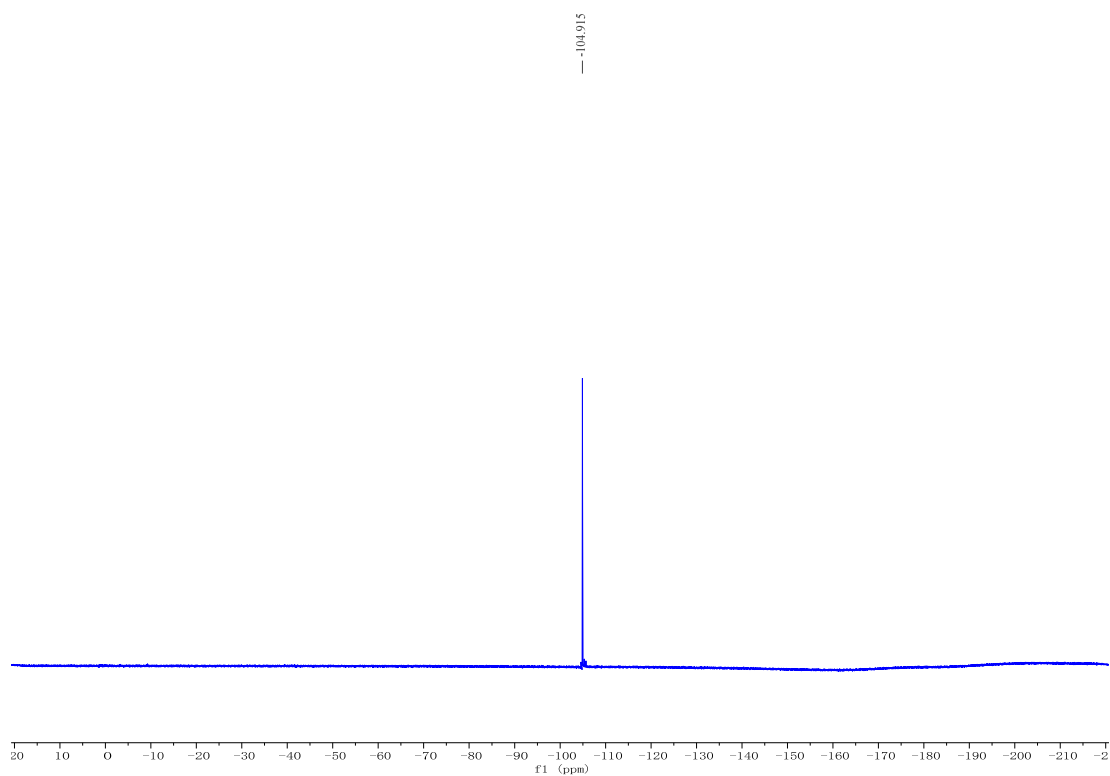 $^1\text{H}$  and  $^{13}\text{C}$  NMR Spectra for Compound 3da: $^1\text{H}$  NMR (400 MHz,  $\text{CDCl}_3$ )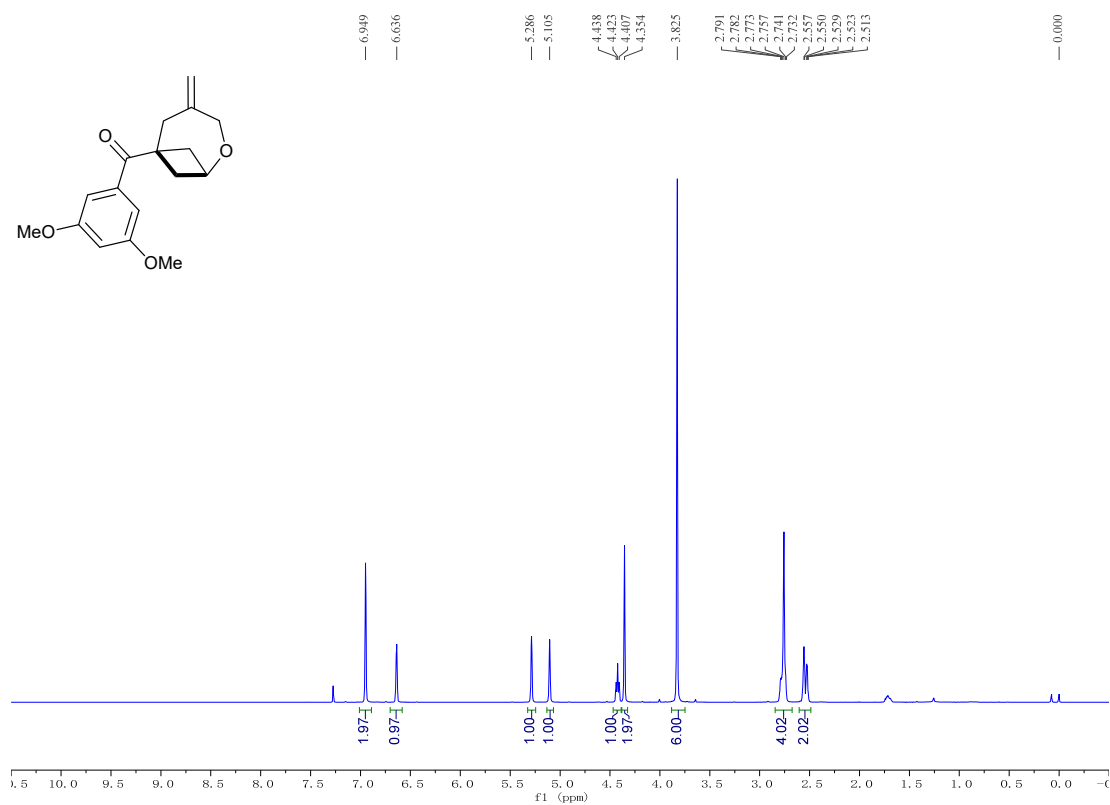

$^{13}\text{C}$  NMR (100 MHz,  $\text{CDCl}_3$ )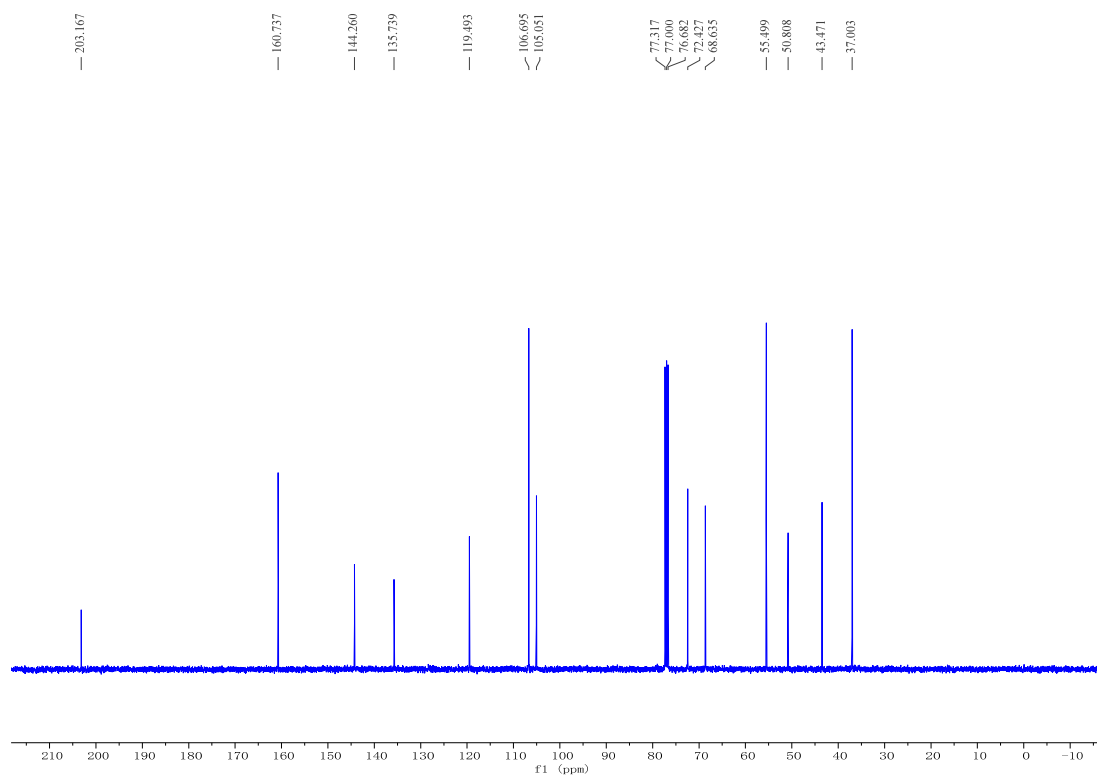 $^1\text{H}$  and  $^{13}\text{C}$  NMR Spectra for Compound 3ea: $^1\text{H}$  NMR (400 MHz,  $\text{CDCl}_3$ )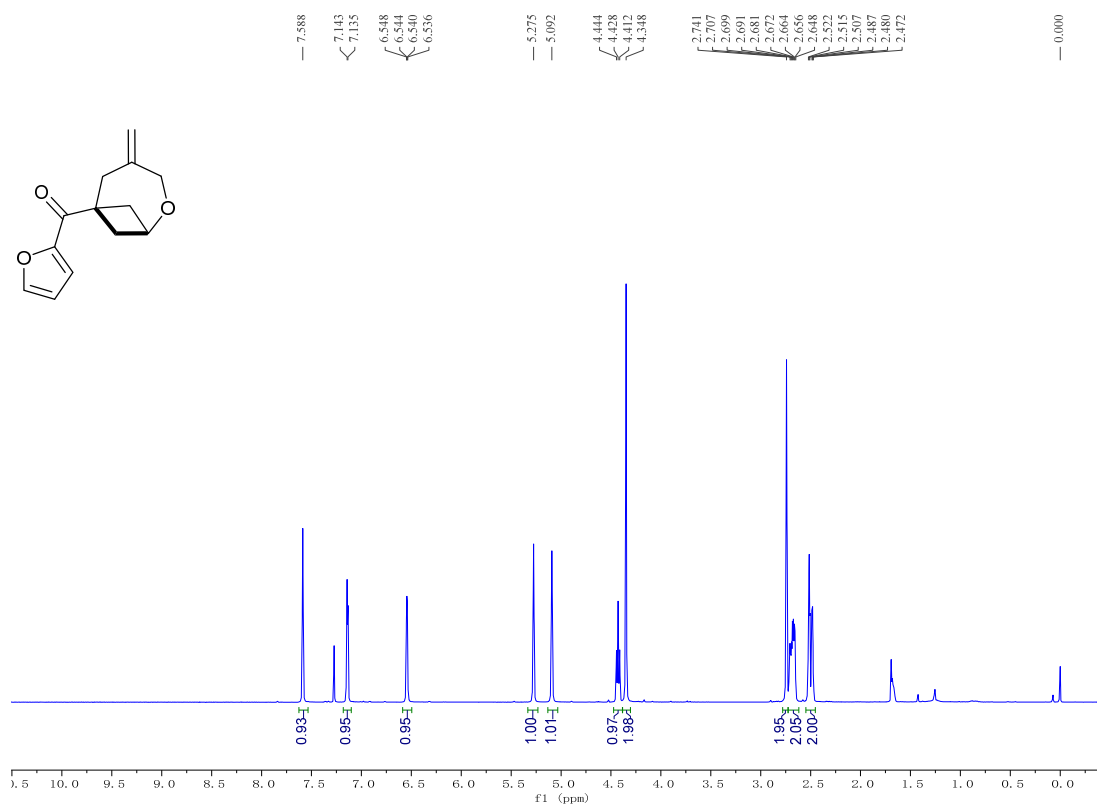

$^{13}\text{C}$  NMR (100 MHz,  $\text{CDCl}_3$ )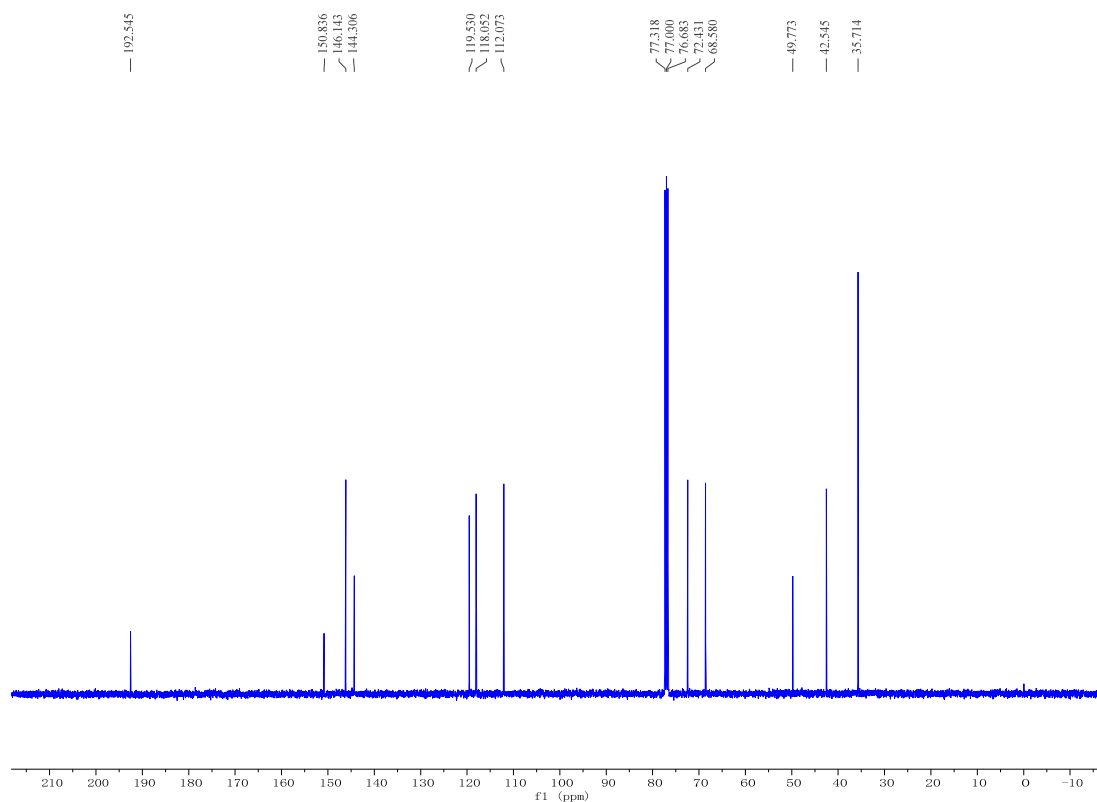 $^1\text{H}$  and  $^{13}\text{C}$  NMR Spectra for Compound 3fa: $^1\text{H}$  NMR (400 MHz,  $\text{CDCl}_3$ )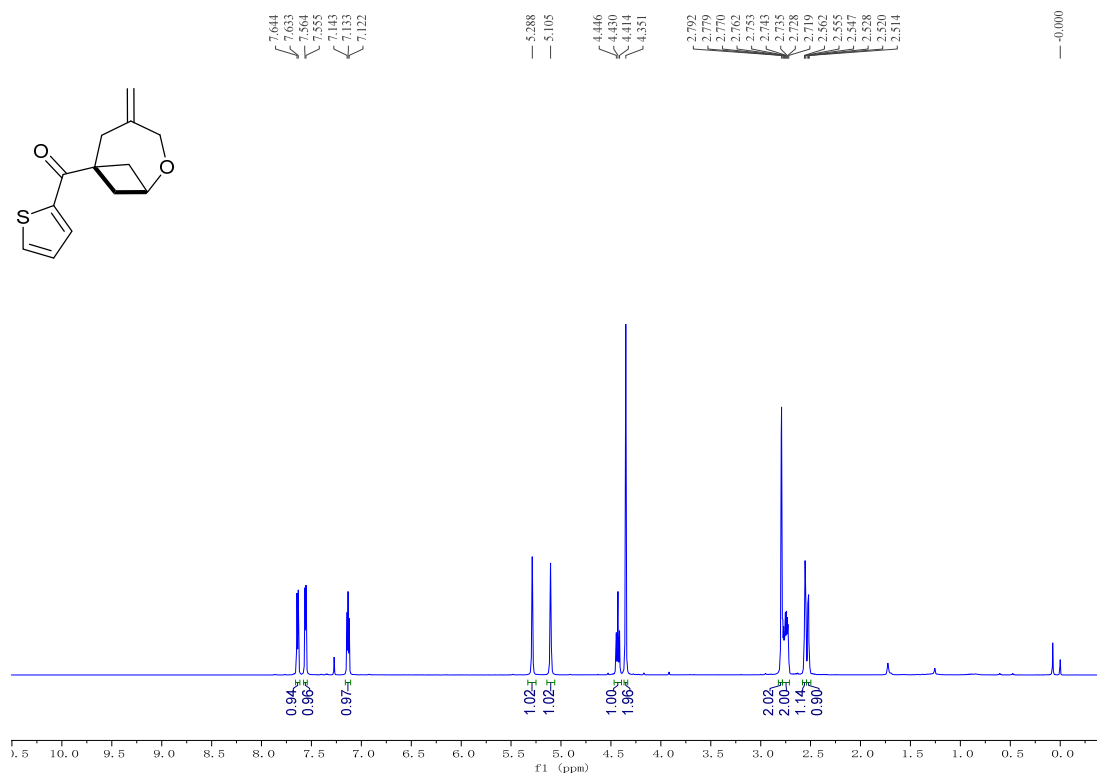

$^{13}\text{C}$  NMR (100 MHz,  $\text{CDCl}_3$ )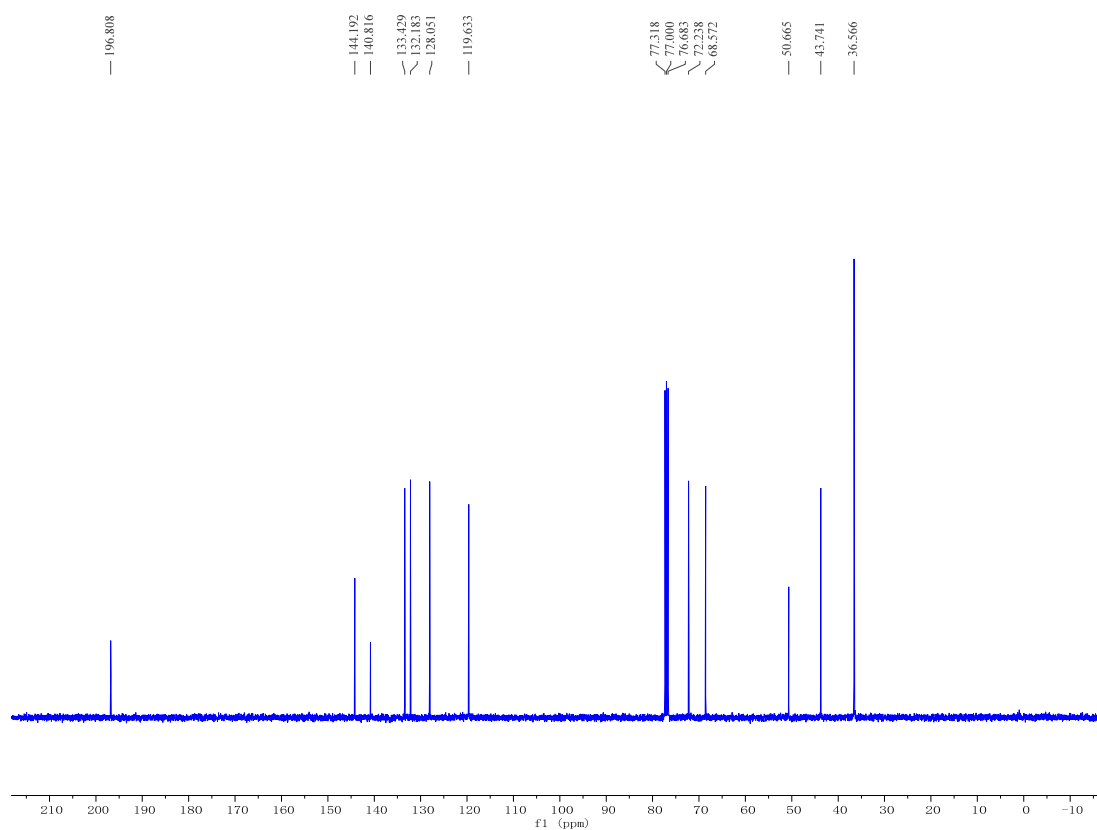 $^1\text{H}$  and  $^{13}\text{C}$  NMR Spectra for Compound 3ga: $^1\text{H}$  NMR (400 MHz,  $\text{CDCl}_3$ )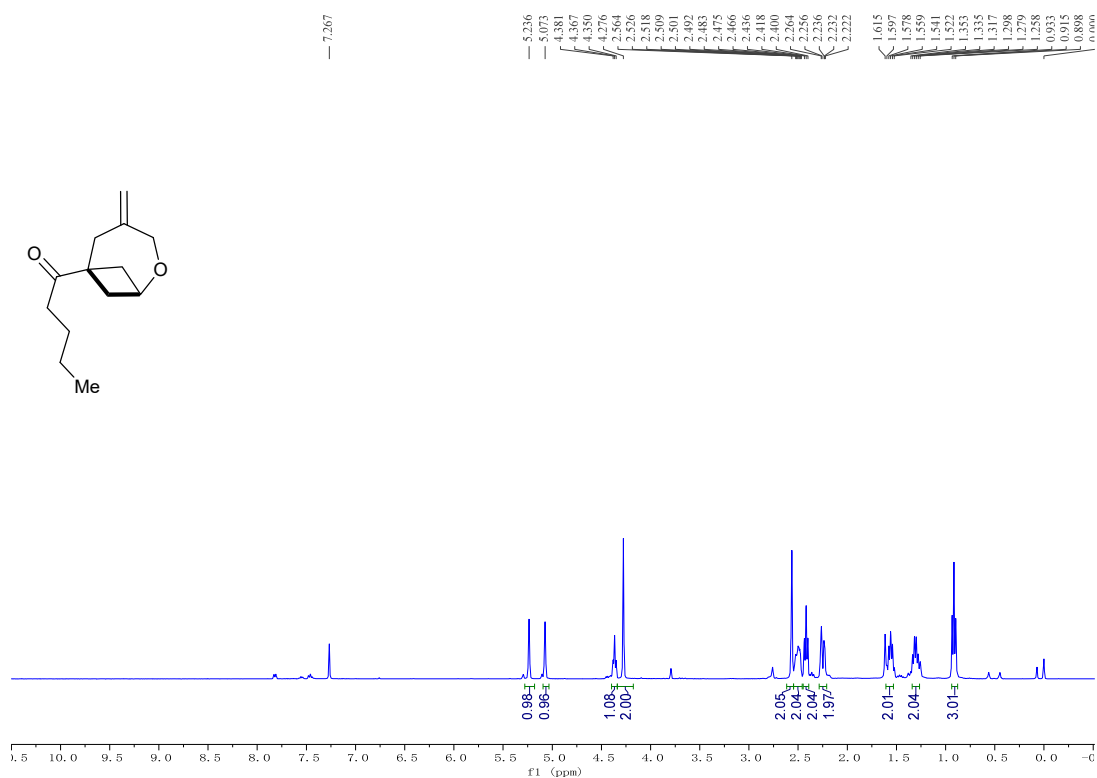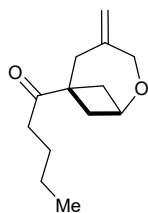

$^{13}\text{C}$  NMR (100 MHz,  $\text{CDCl}_3$ )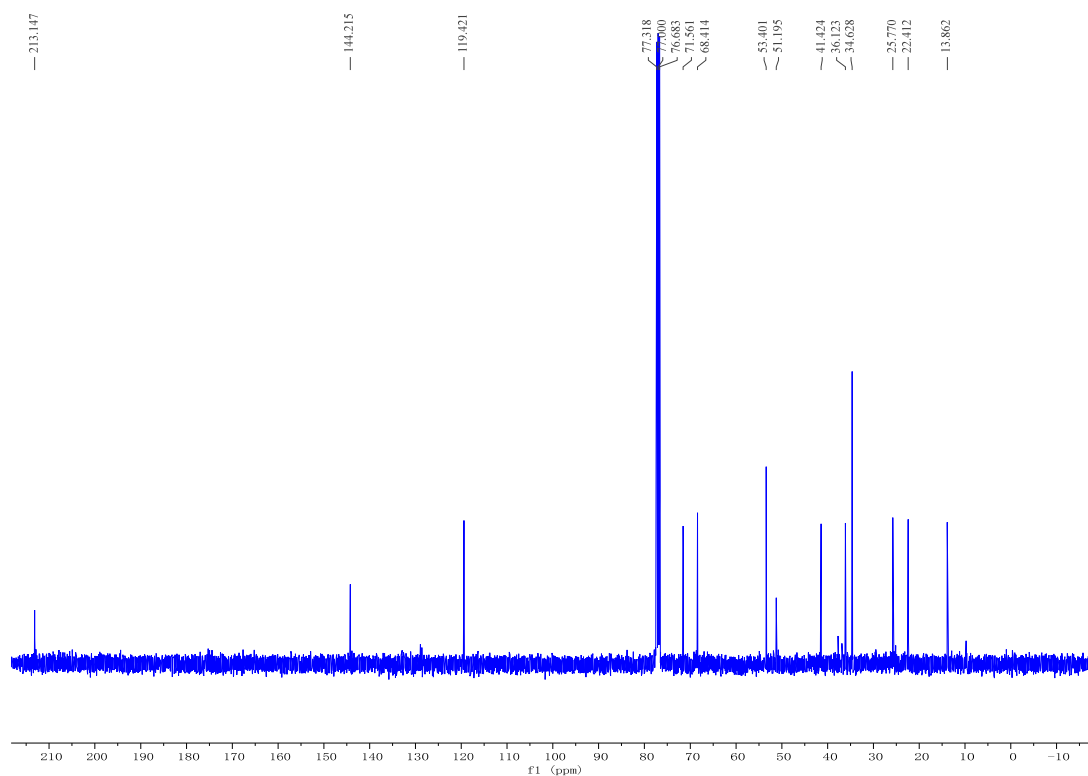 $^1\text{H}$  and  $^{13}\text{C}$  NMR Spectra for Compound 3ha: $^1\text{H}$  NMR (400 MHz,  $\text{CDCl}_3$ )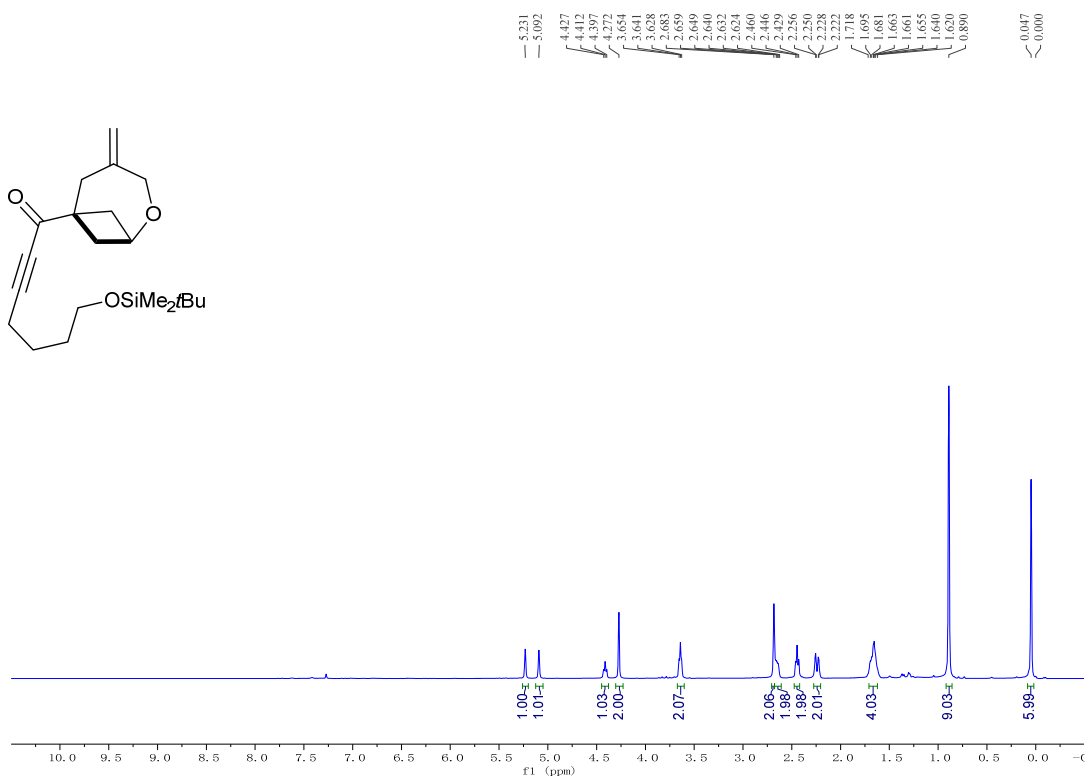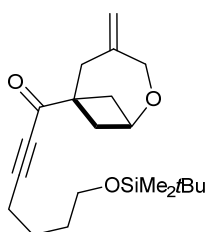

$^{13}\text{C}$  NMR (100 MHz,  $\text{CDCl}_3$ )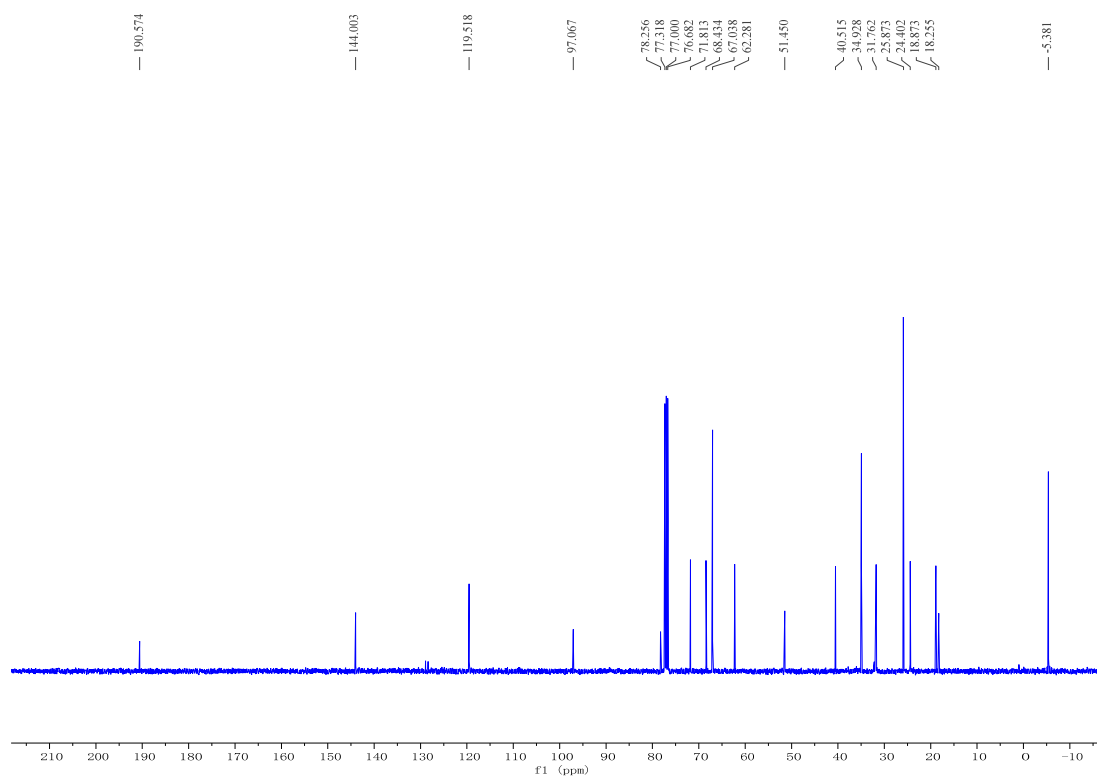 $^1\text{H}$  and  $^{13}\text{C}$  NMR Spectra for Compound 3ab $^1\text{H}$  NMR (400 MHz,  $\text{CDCl}_3$ )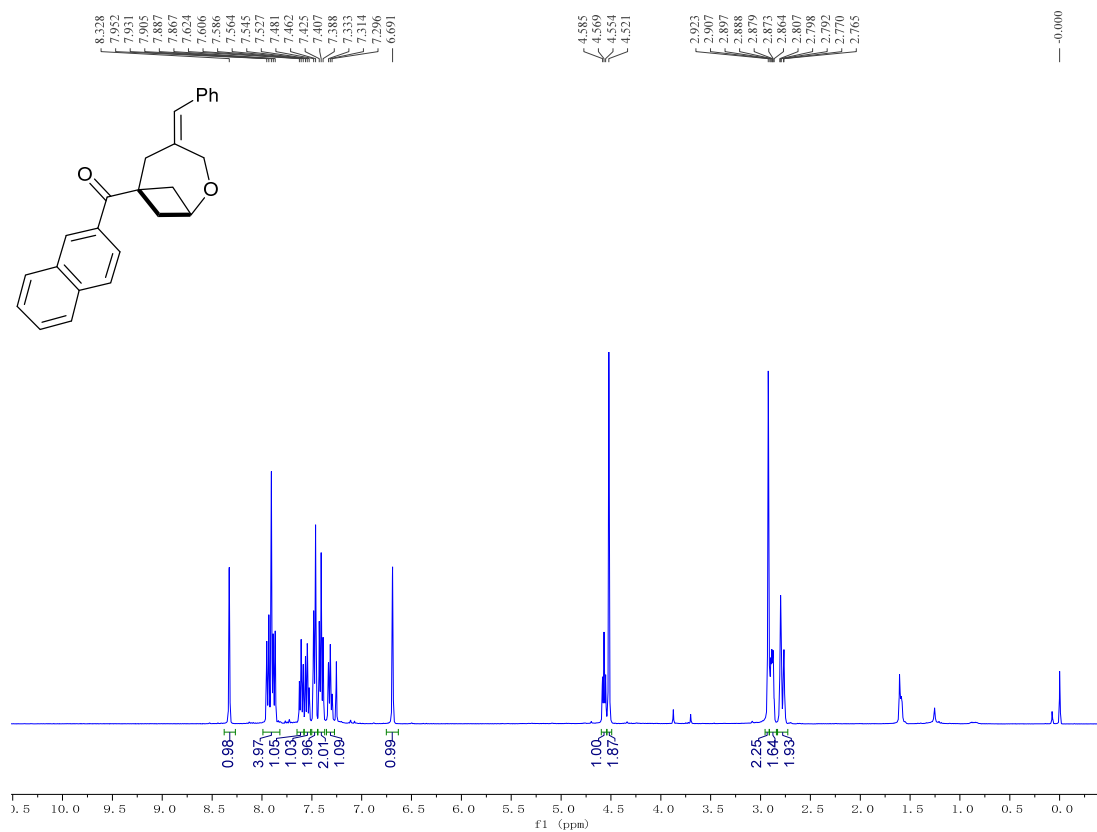

$^{13}\text{C}$  NMR (100 MHz,  $\text{CDCl}_3$ )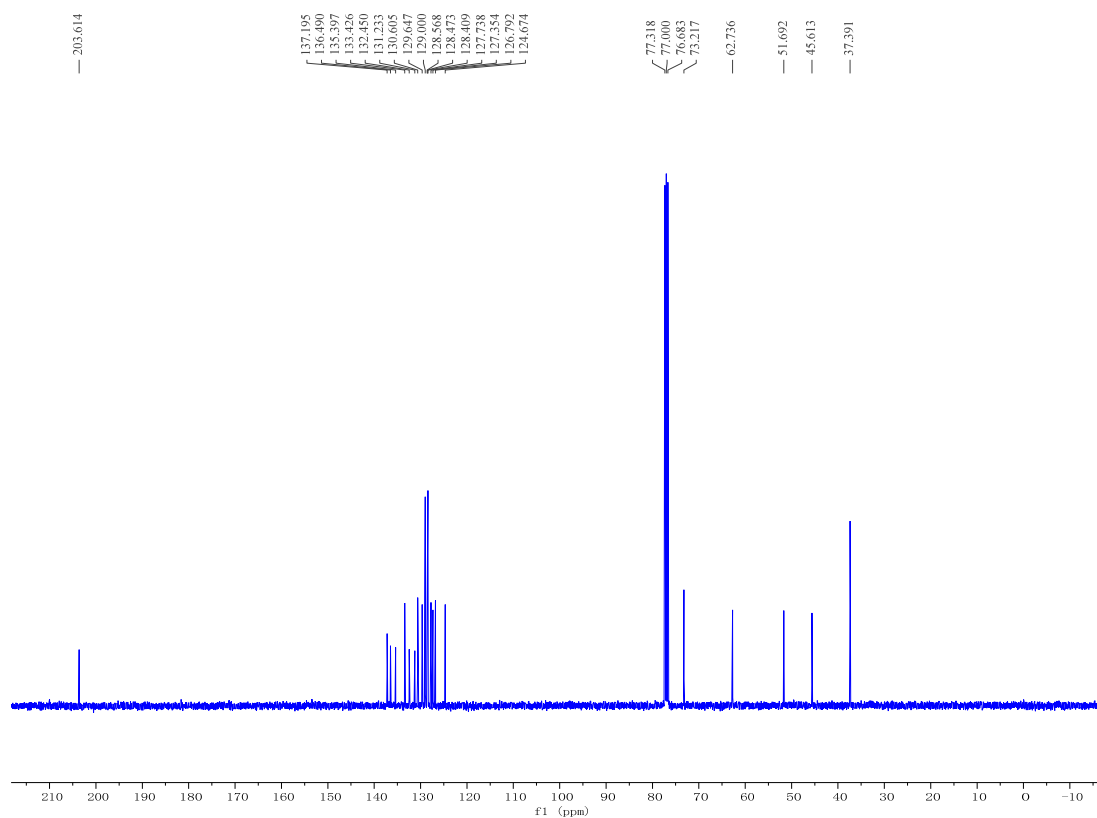 $^1\text{H}$  and  $^{13}\text{C}$  NMR Spectra for Compound 3ac: $^1\text{H}$  NMR (400 MHz,  $\text{CDCl}_3$ )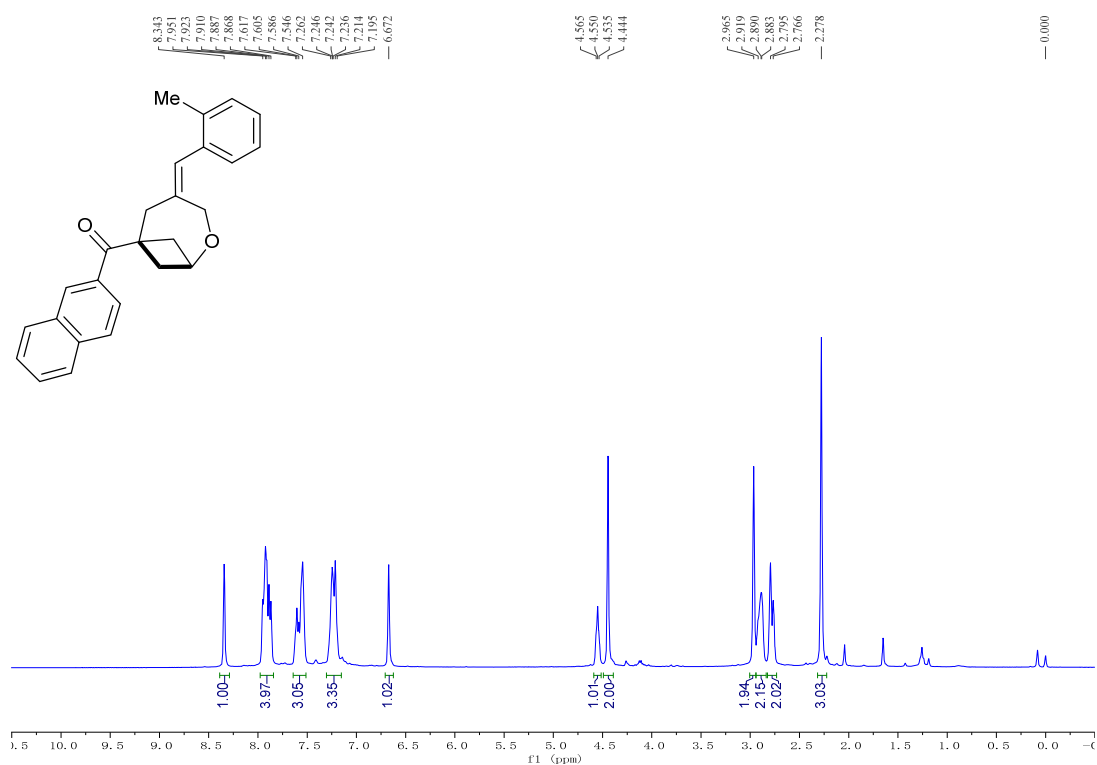



$^{13}\text{C}$  NMR (100 MHz,  $\text{CDCl}_3$ )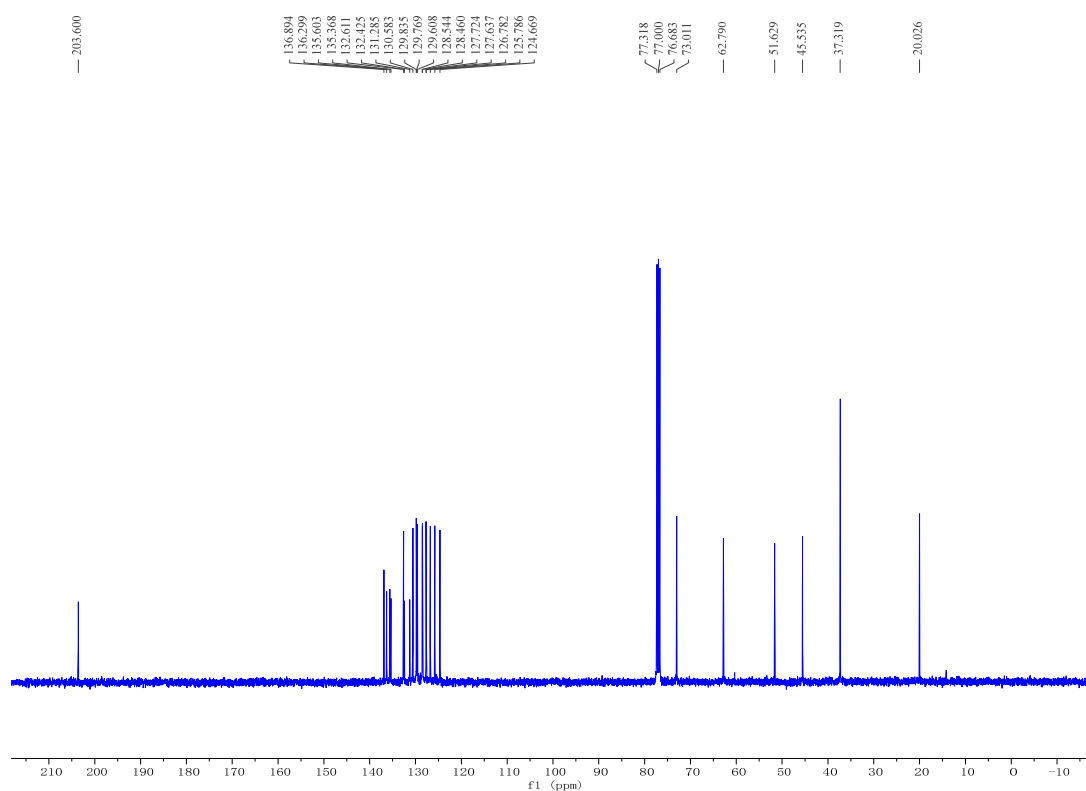 $^1\text{H}$  and  $^{13}\text{C}$  NMR Spectra for Compound 3ad: $^1\text{H}$  NMR (400 MHz,  $\text{CDCl}_3$ )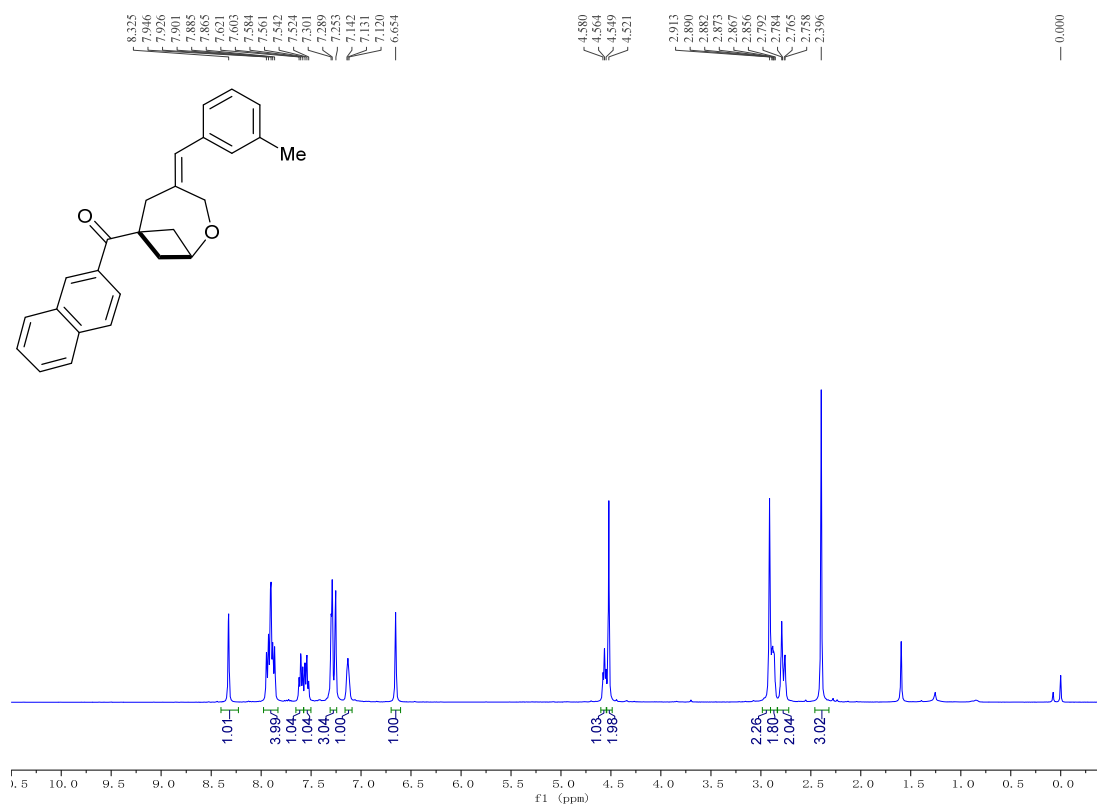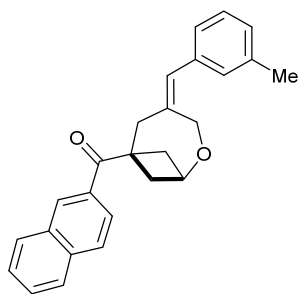

$^{13}\text{C}$  NMR (100 MHz,  $\text{CDCl}_3$ )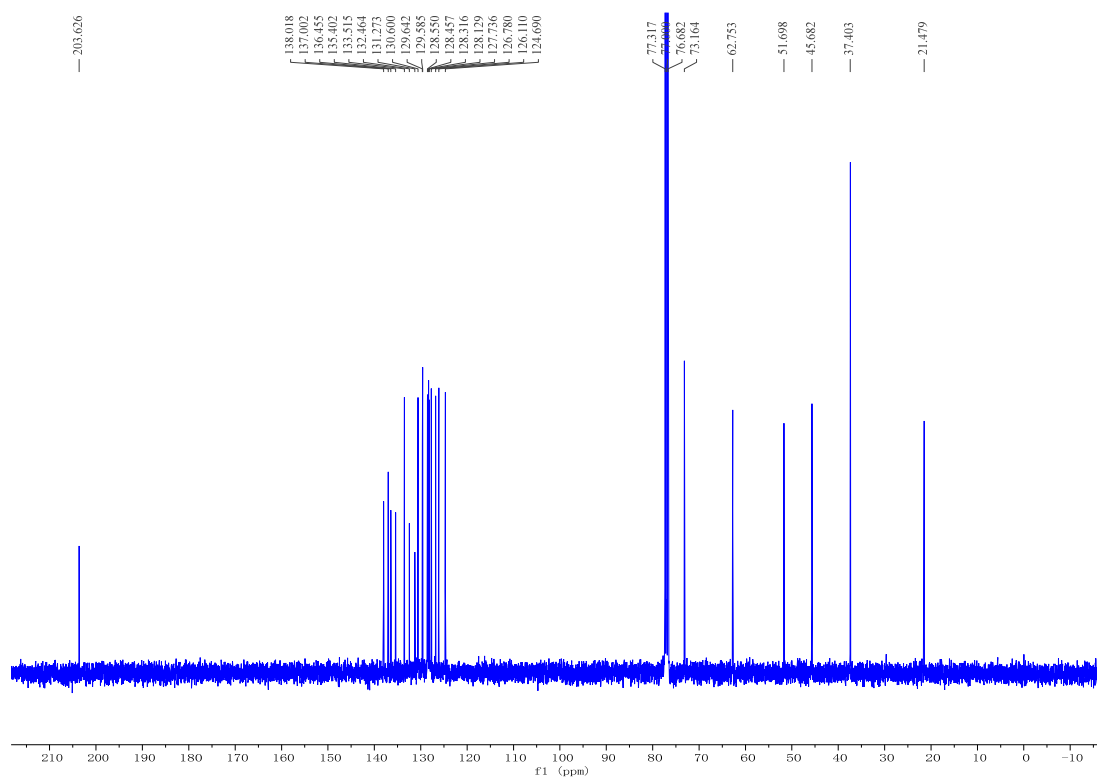 $^1\text{H}$  and  $^{13}\text{C}$  NMR Spectra for Compound 3ae $^1\text{H}$  NMR (600 MHz,  $\text{CDCl}_3$ )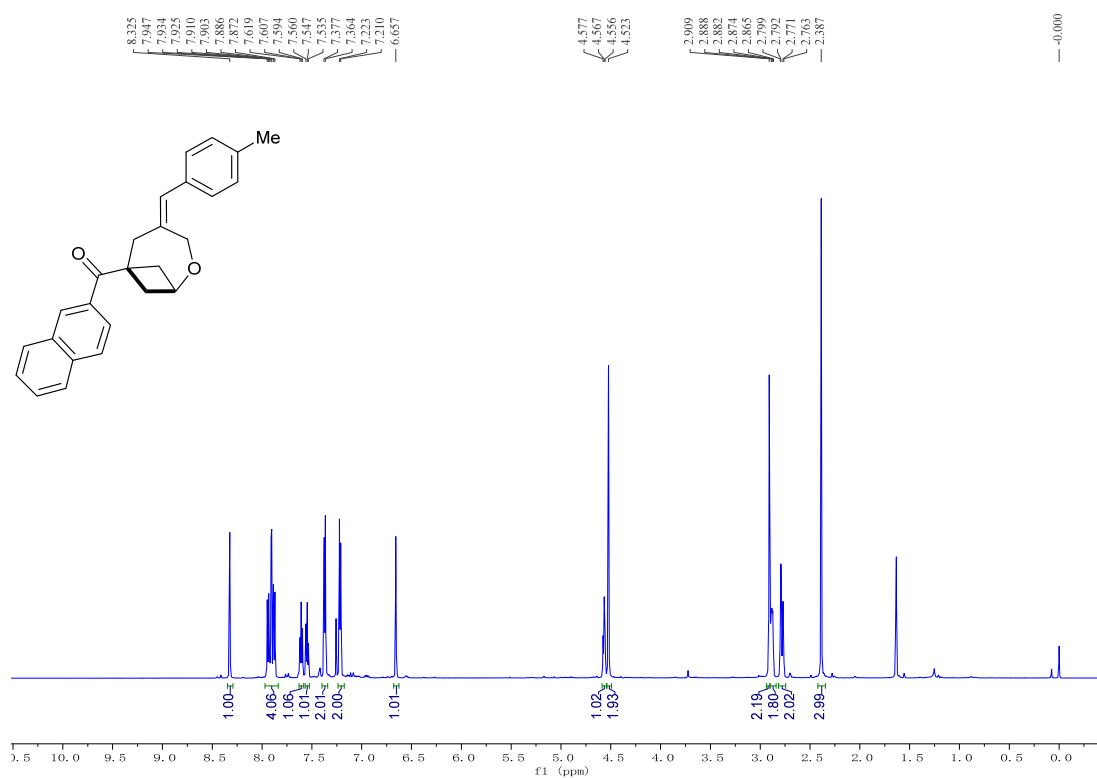

$^{13}\text{C}$  NMR (150 MHz,  $\text{CDCl}_3$ )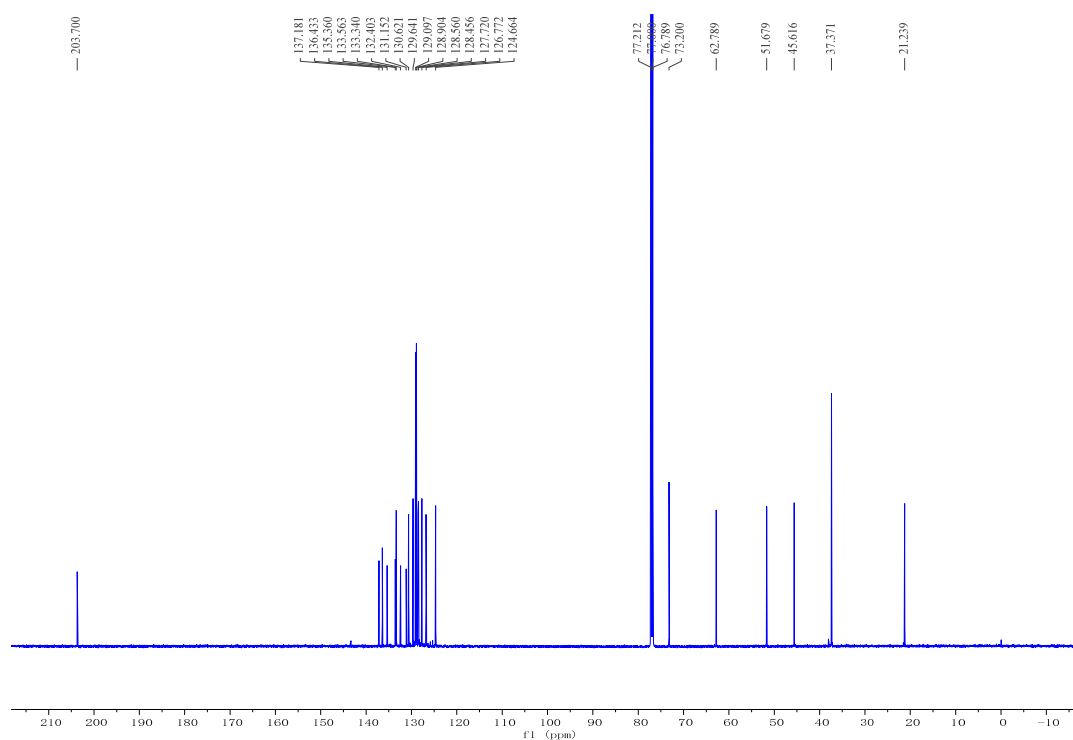 $^1\text{H}$  and  $^{13}\text{C}$  NMR Spectra for Compound 3af: $^1\text{H}$  NMR (400 MHz,  $\text{CDCl}_3$ )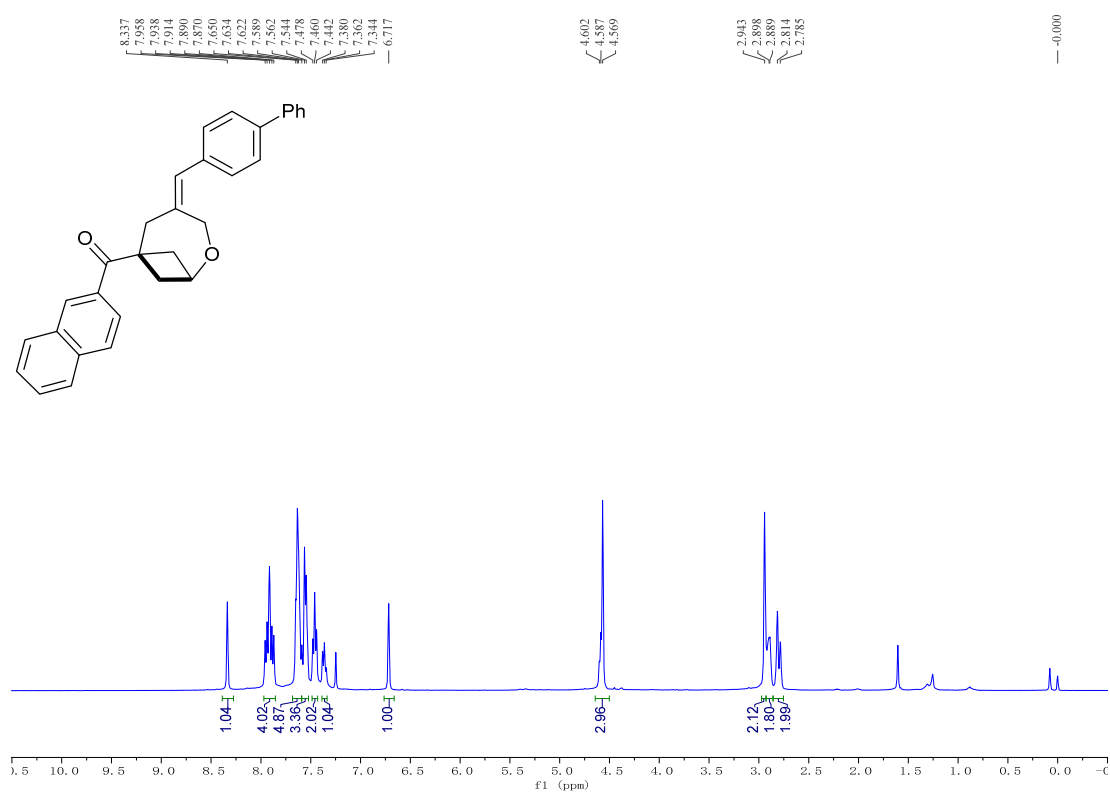

$^{13}\text{C}$  NMR (100 MHz,  $\text{CDCl}_3$ )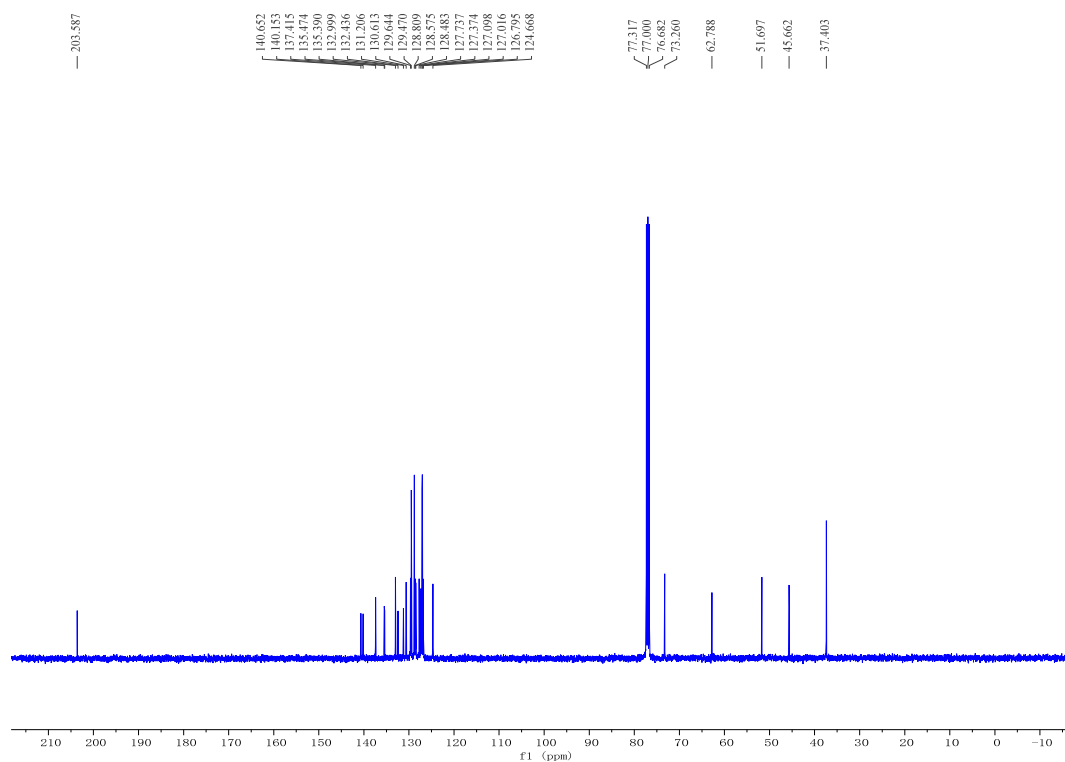 $^1\text{H}$  and  $^{13}\text{C}$  NMR Spectra for Compound 3ag: $^1\text{H}$  NMR (400 MHz,  $\text{CDCl}_3$ )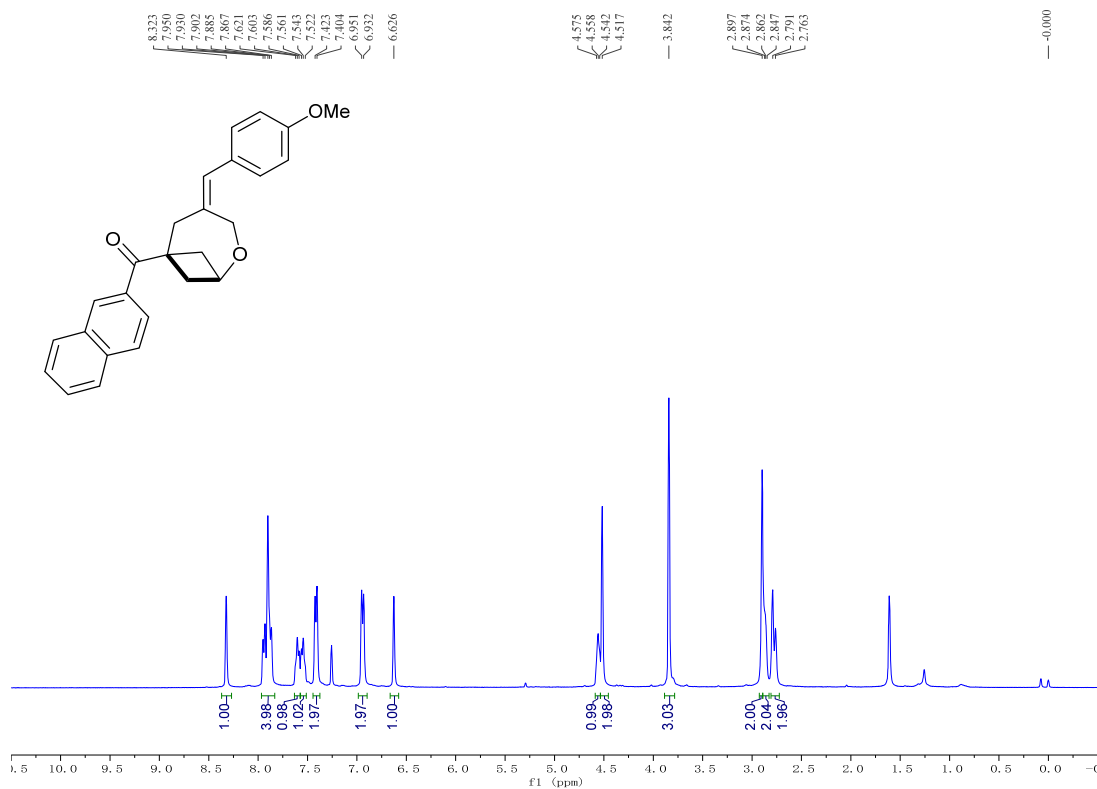

$^{13}\text{C}$  NMR (100 MHz,  $\text{CDCl}_3$ )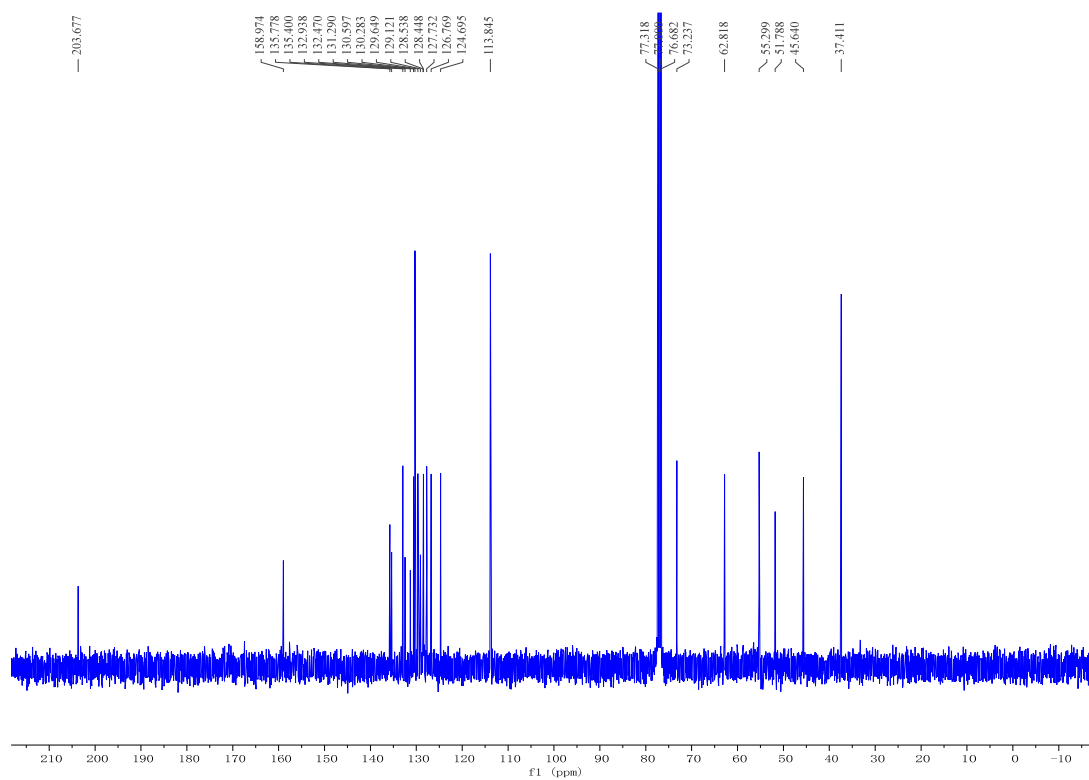 $^1\text{H}$  and  $^{13}\text{C}$  NMR Spectra for Compound 3ah: $^1\text{H}$  NMR (600 MHz,  $\text{CDCl}_3$ )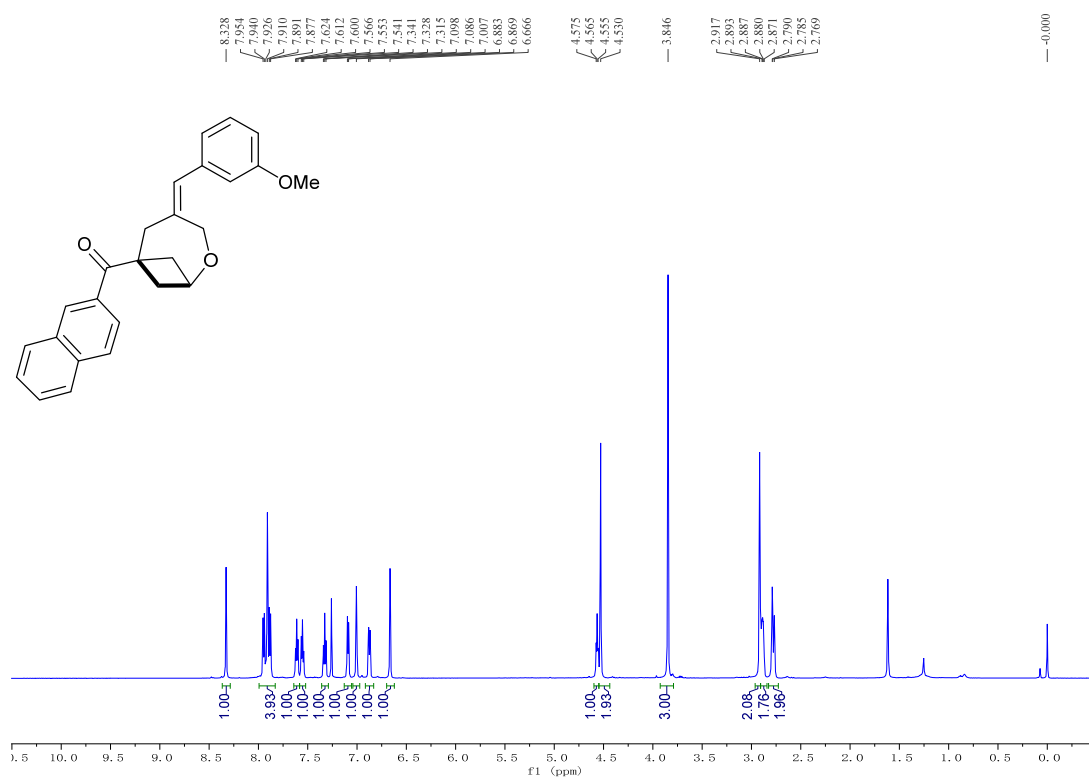

$^{13}\text{C}$  NMR (150 MHz,  $\text{CDCl}_3$ )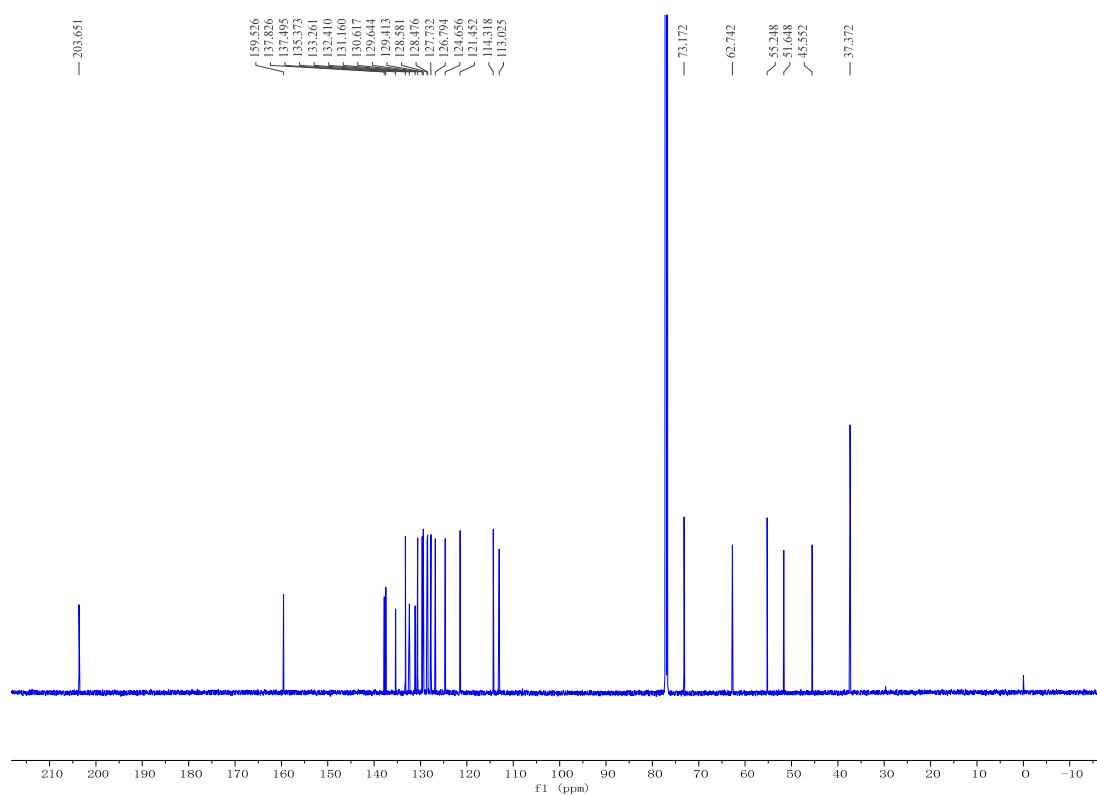 $^1\text{H}$  and  $^{13}\text{C}$  NMR Spectra for Compound 3ai: $^1\text{H}$  NMR (400 MHz,  $\text{CDCl}_3$ )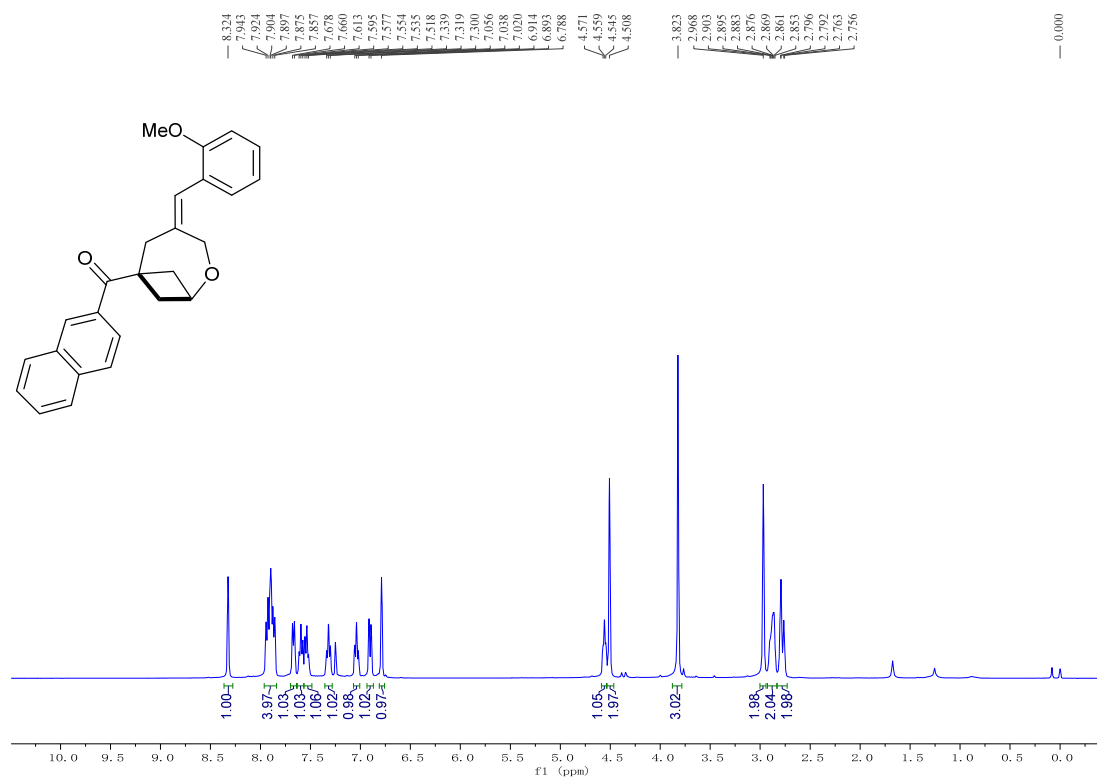

$^{13}\text{C}$  NMR (100 MHz,  $\text{CDCl}_3$ )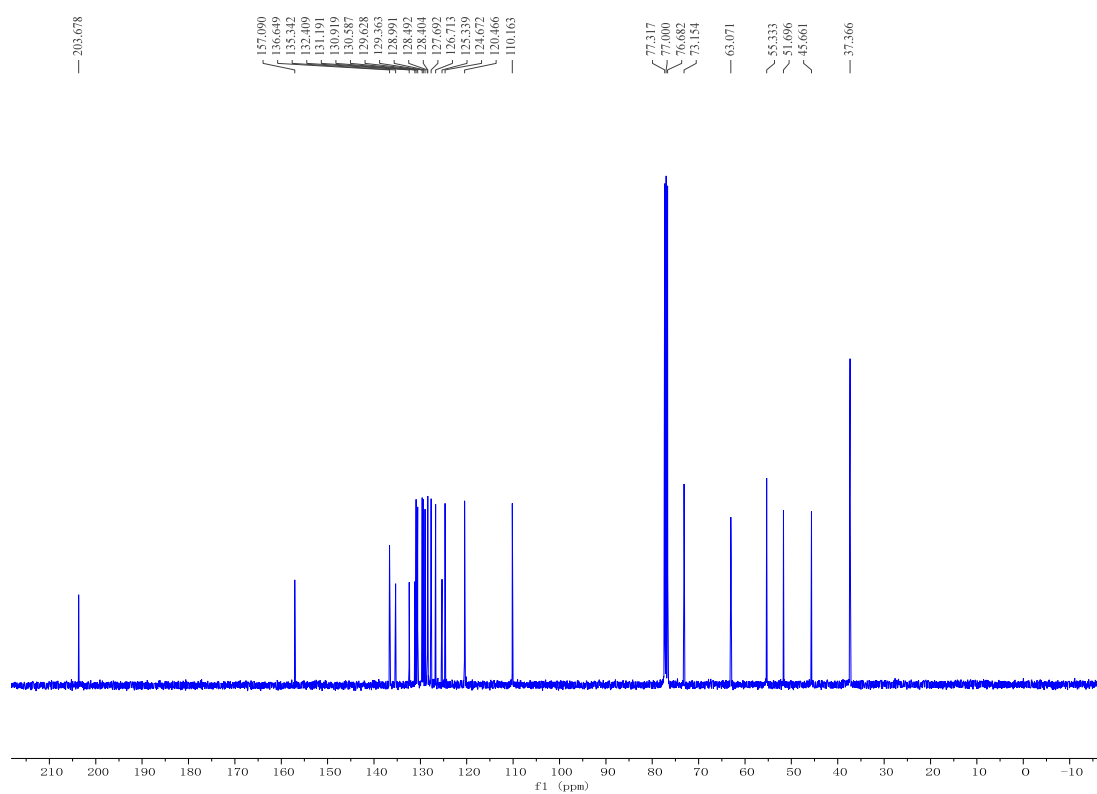 $^1\text{H}$  and  $^{13}\text{C}$  NMR Spectra for Compound 3aj: $^1\text{H}$  NMR (600 MHz,  $\text{CDCl}_3$ )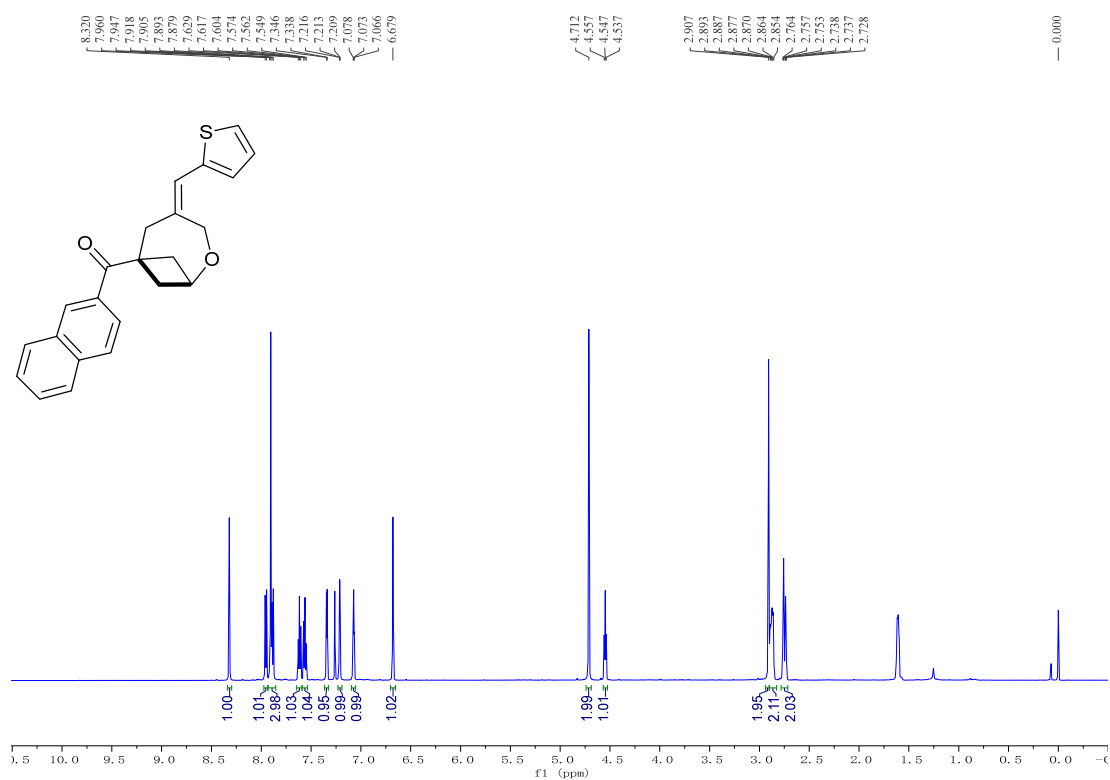

$^{13}\text{C}$  NMR (150 MHz,  $\text{CDCl}_3$ )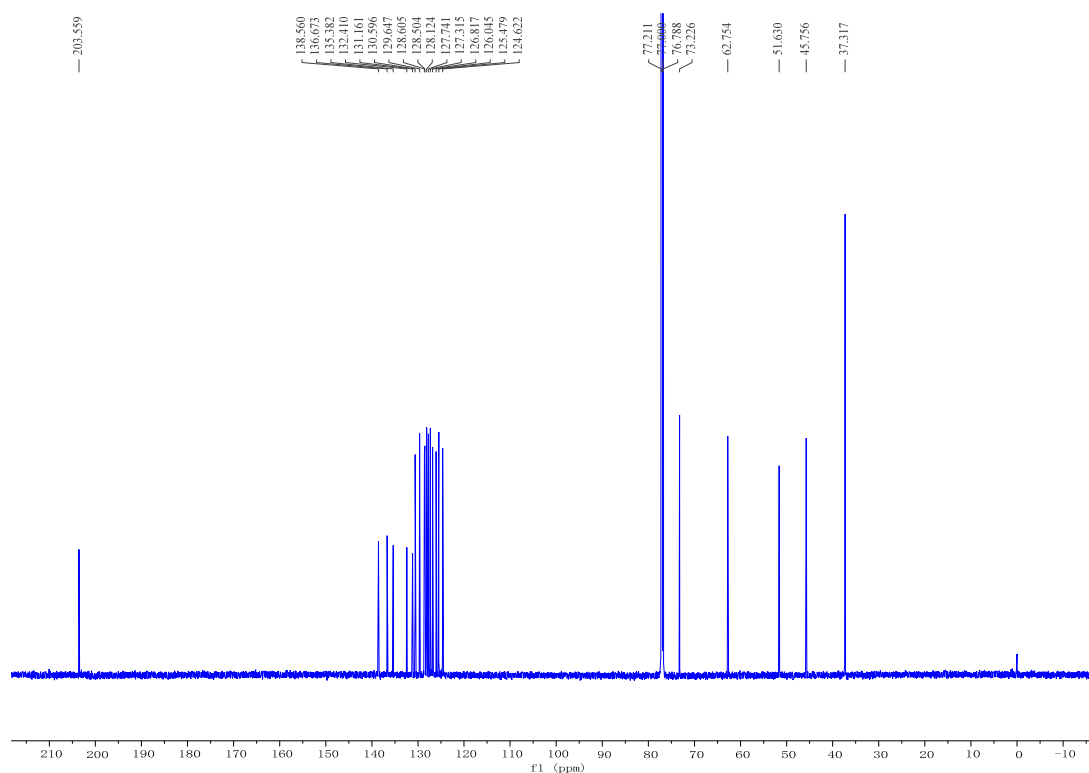 $^1\text{H}$  and  $^{13}\text{C}$  NMR Spectra for Compound 3ak: $^1\text{H}$  NMR (400 MHz,  $\text{CDCl}_3$ )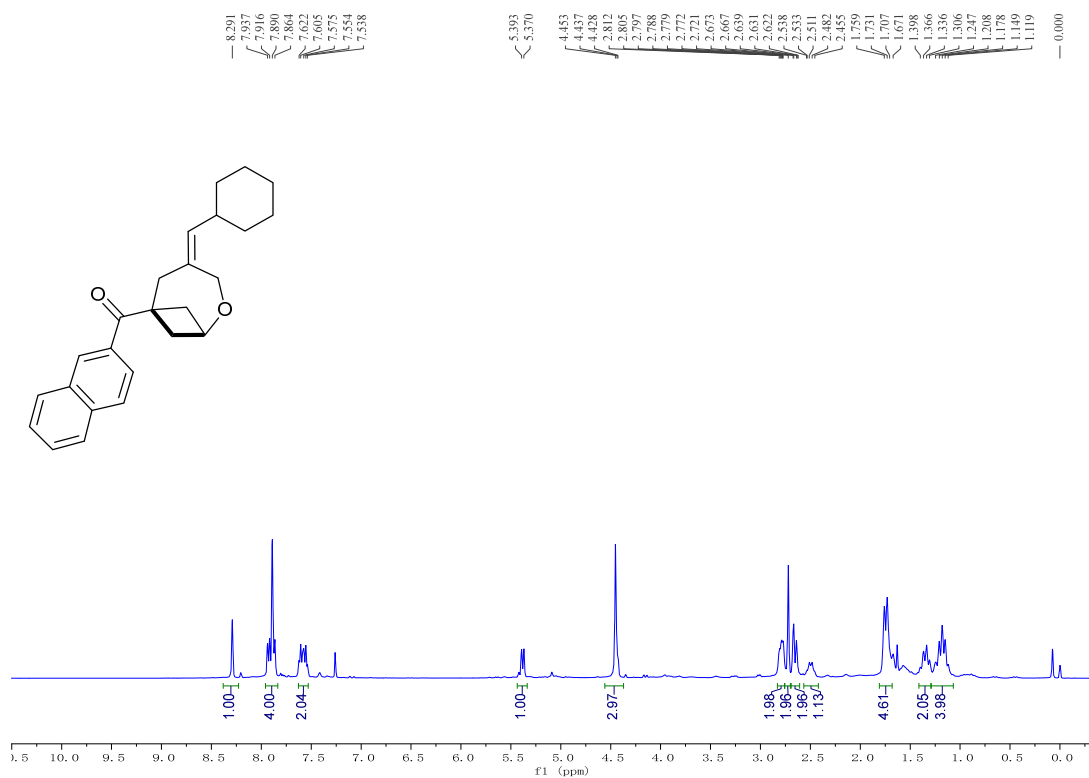



$^{13}\text{C}$  NMR (100 MHz,  $\text{CDCl}_3$ )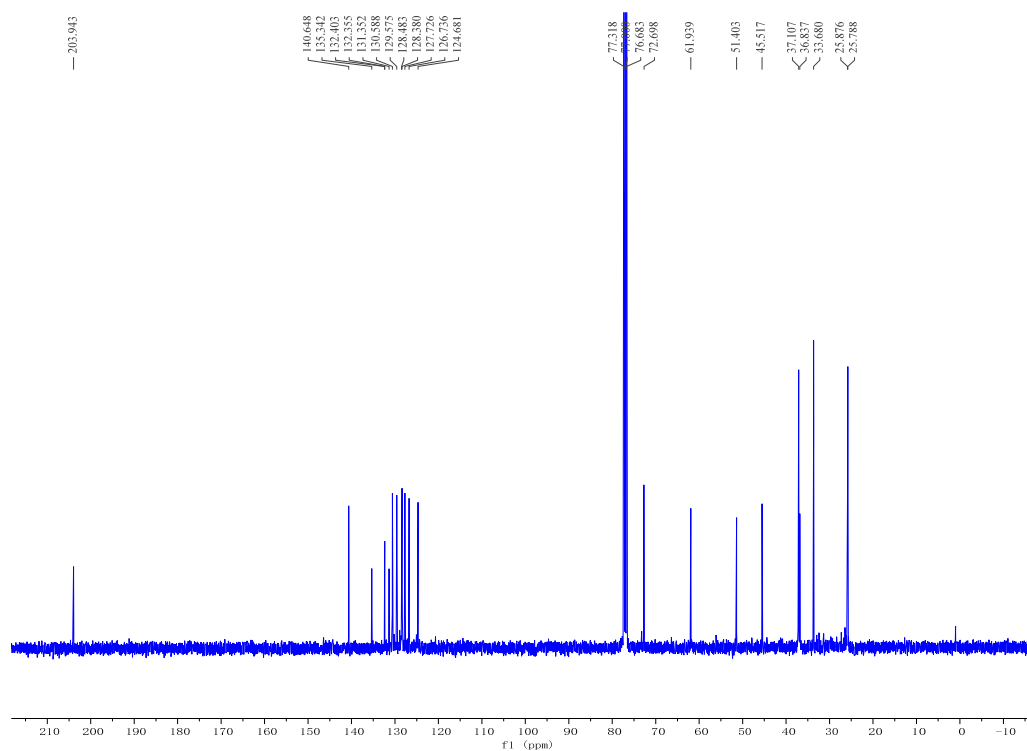 $^1\text{H}$  and  $^{13}\text{C}$  NMR Spectra for Compound (Z)-3dl: $^1\text{H}$  NMR (400 MHz,  $\text{CDCl}_3$ )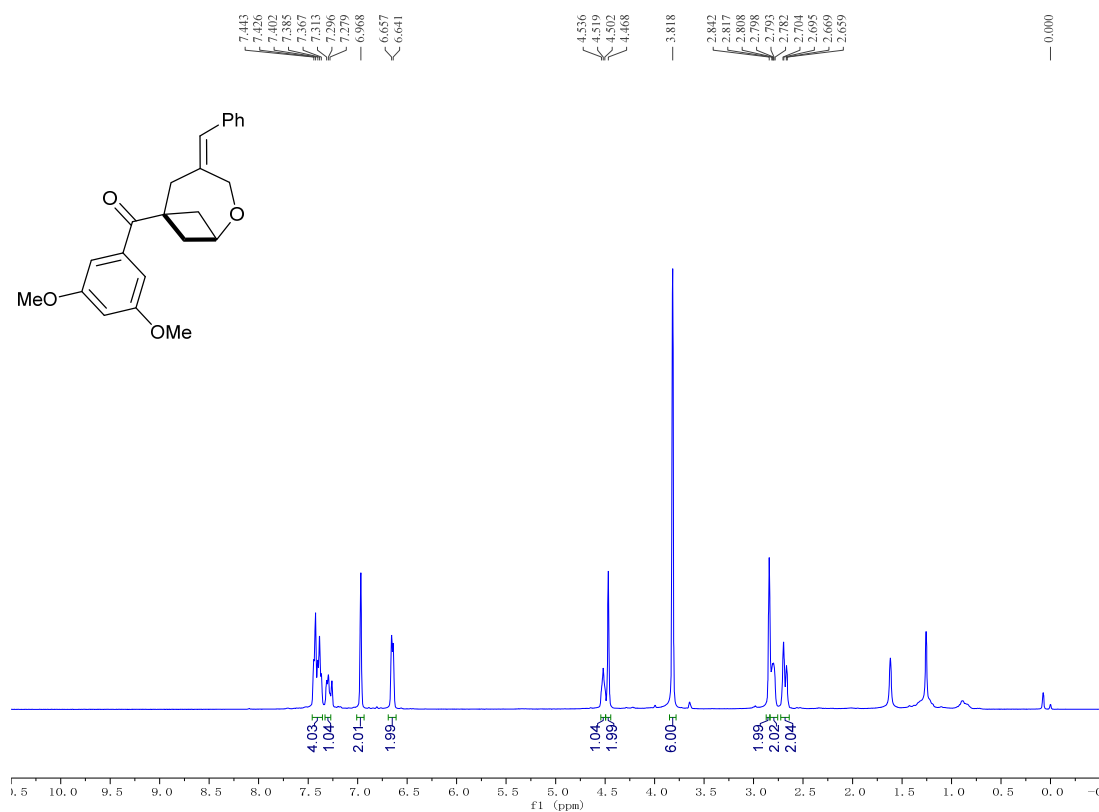

$^{13}\text{C}$  NMR (100 MHz,  $\text{CDCl}_3$ )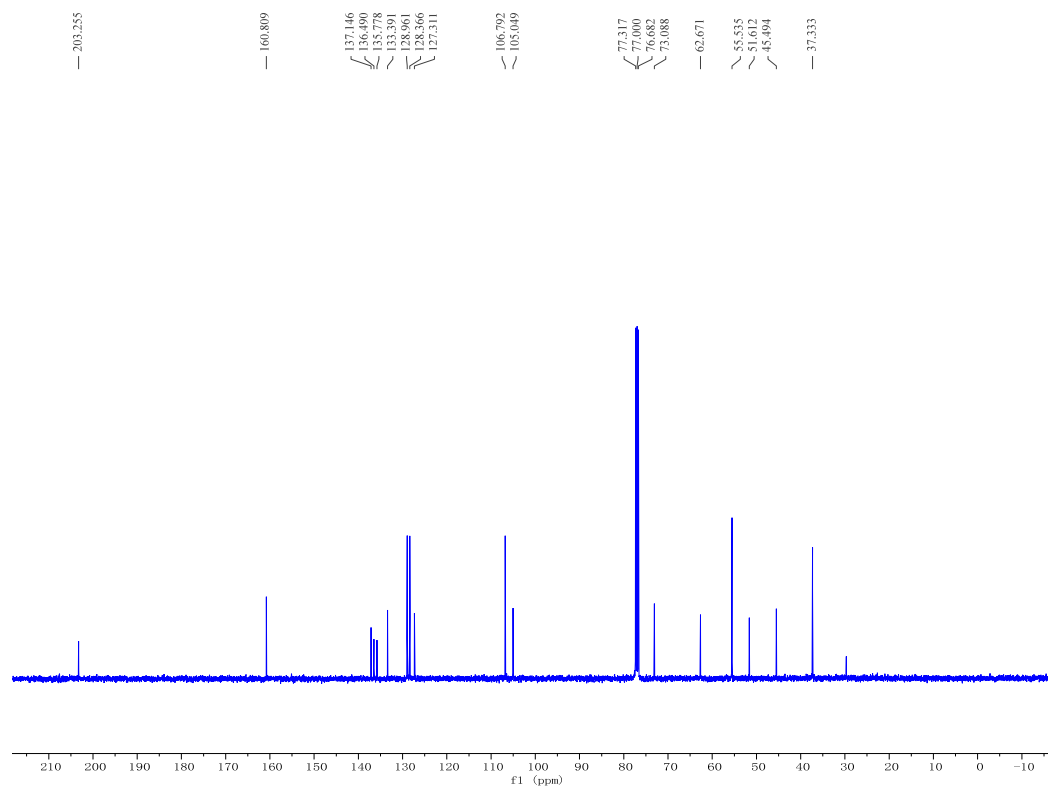 $^1\text{H}$  and  $^{13}\text{C}$  NMR Spectra for Compound 4dl': $^1\text{H}$  NMR (400 MHz,  $\text{CDCl}_3$ )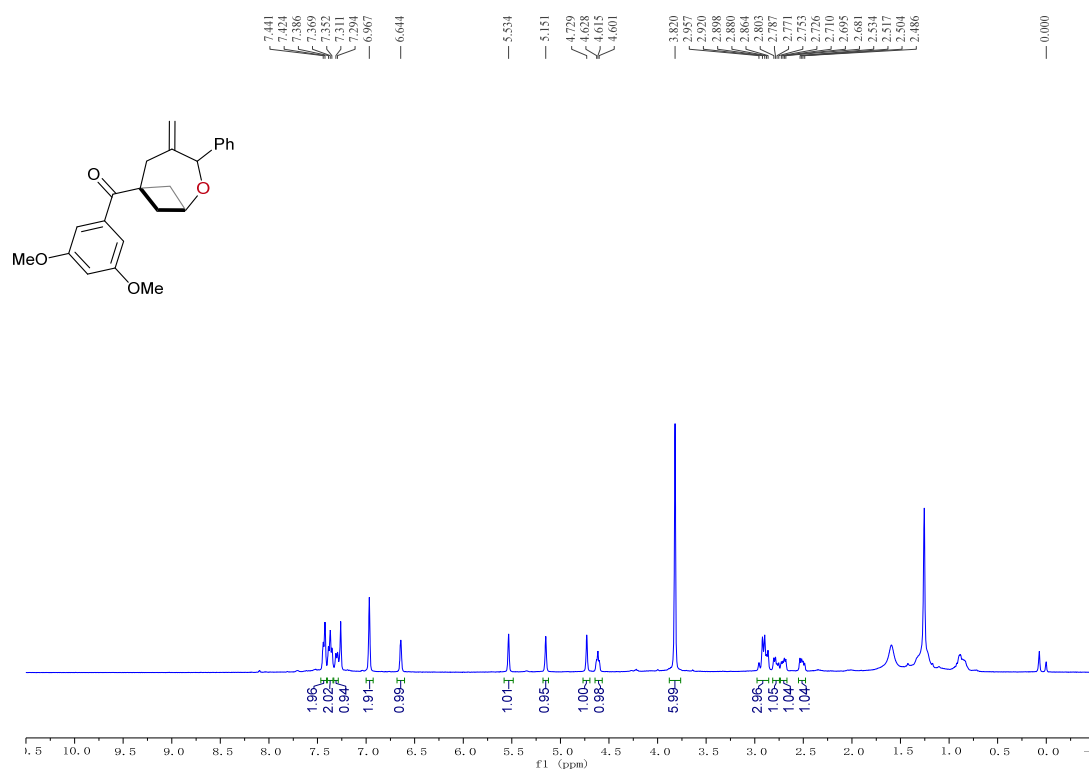

$^{13}\text{C}$  NMR (150 MHz,  $\text{CDCl}_3$ )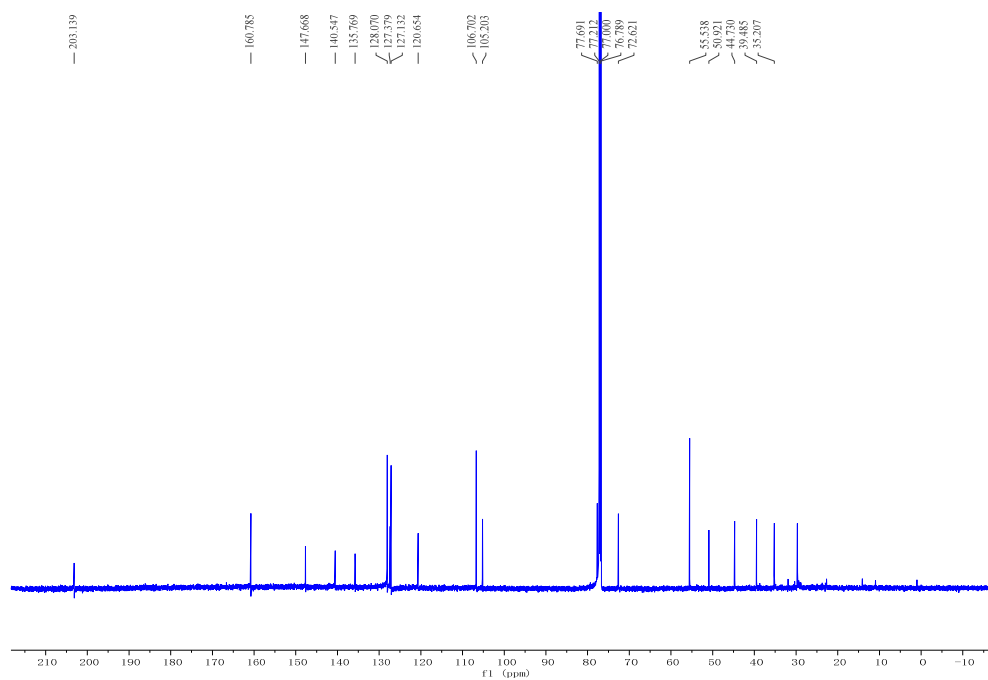 $^1\text{H}$  and  $^{13}\text{C}$  NMR Spectra for Compound (E)-3dl and 4dl: $^1\text{H}$  NMR (400 MHz,  $\text{CDCl}_3$ )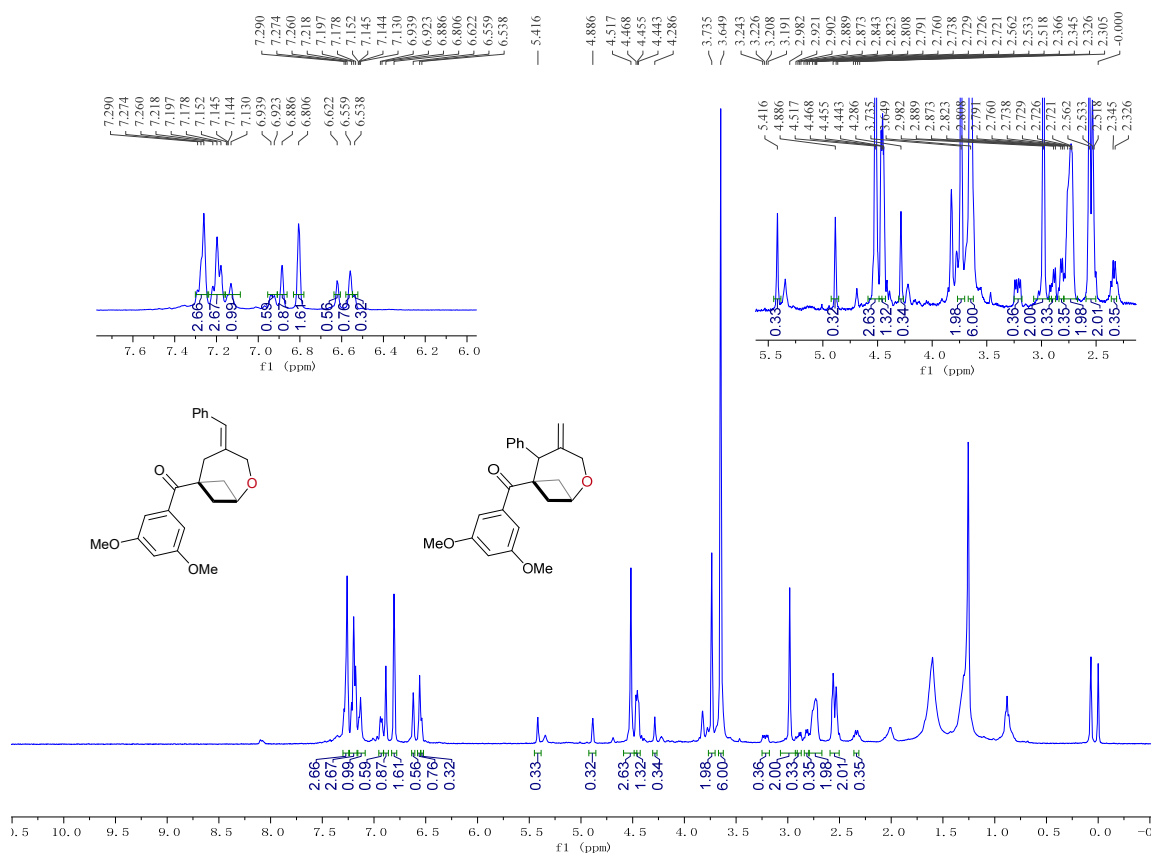

$^{13}\text{C}$  NMR (150 MHz,  $\text{CDCl}_3$ )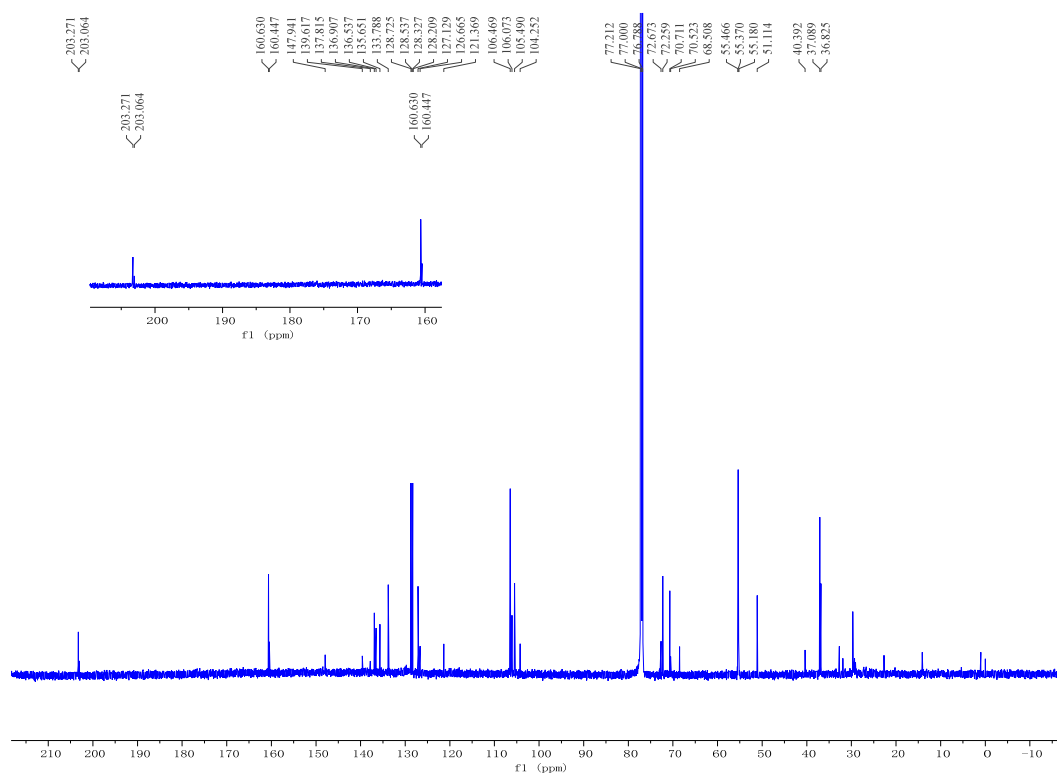 $^1\text{H}$  and  $^{13}\text{C}$  NMR Spectra for Compound 3am: $^1\text{H}$  NMR (600 MHz,  $\text{CDCl}_3$ )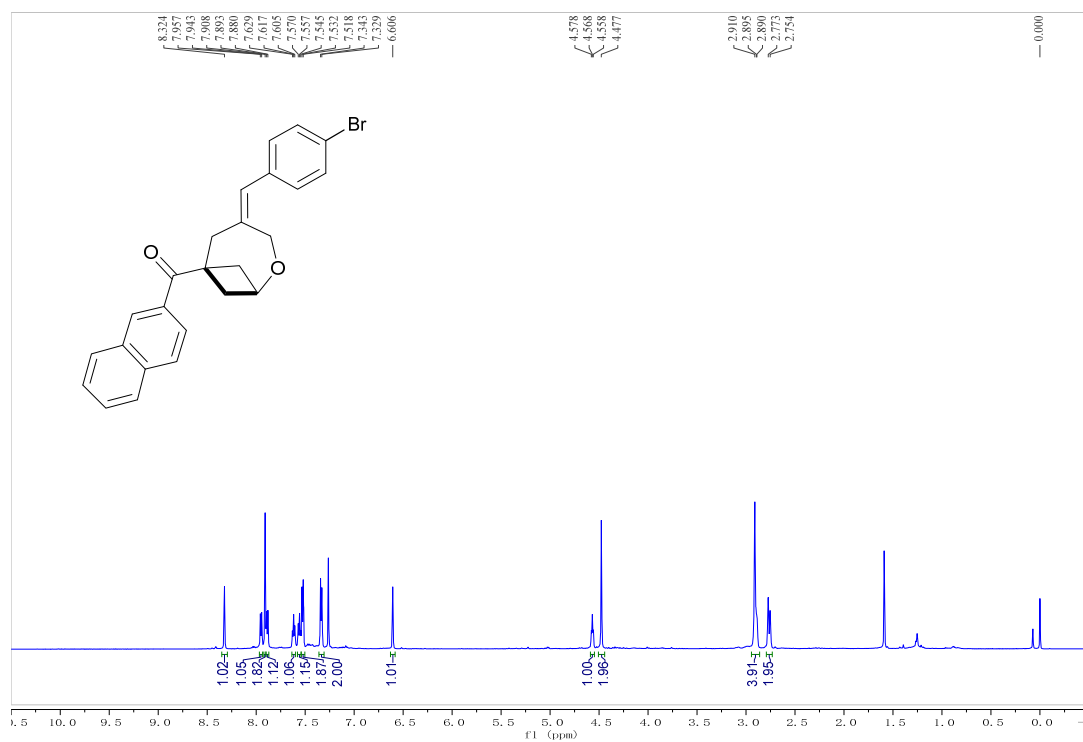

$^{13}\text{C}$  NMR (150 MHz,  $\text{CDCl}_3$ )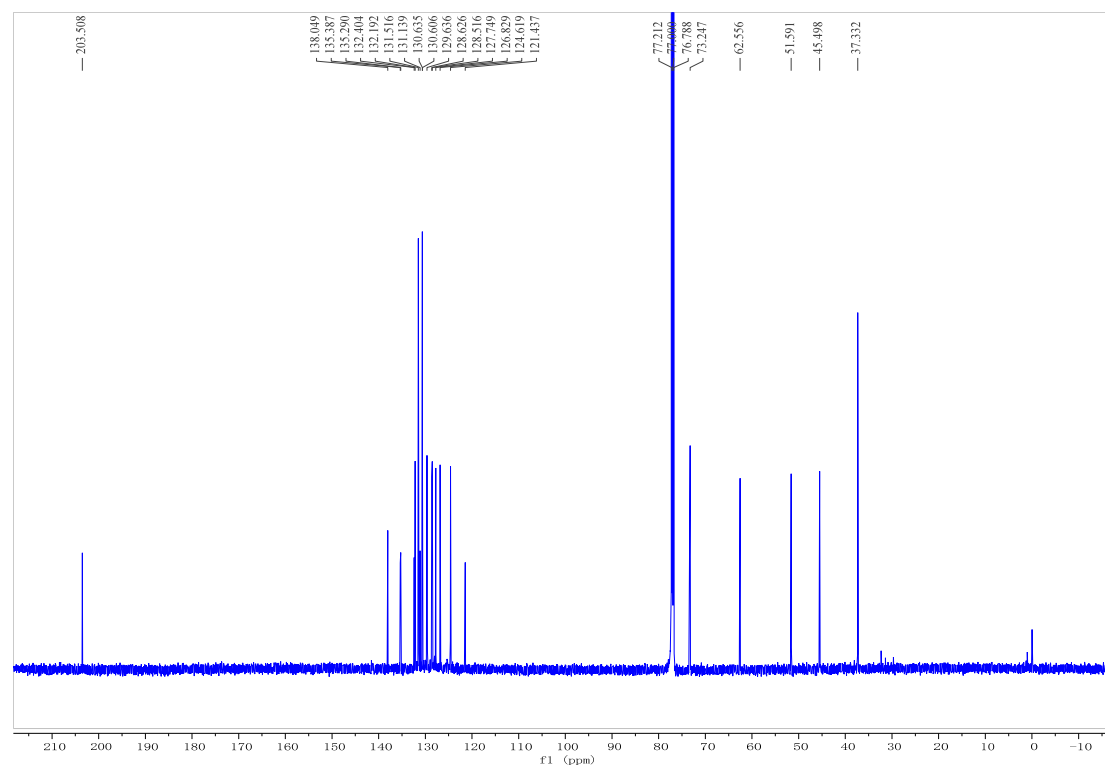 $^1\text{H}$  and  $^{13}\text{C}$  NMR Spectra for Compound 6 $^1\text{H}$  NMR (400 MHz,  $\text{CDCl}_3$ )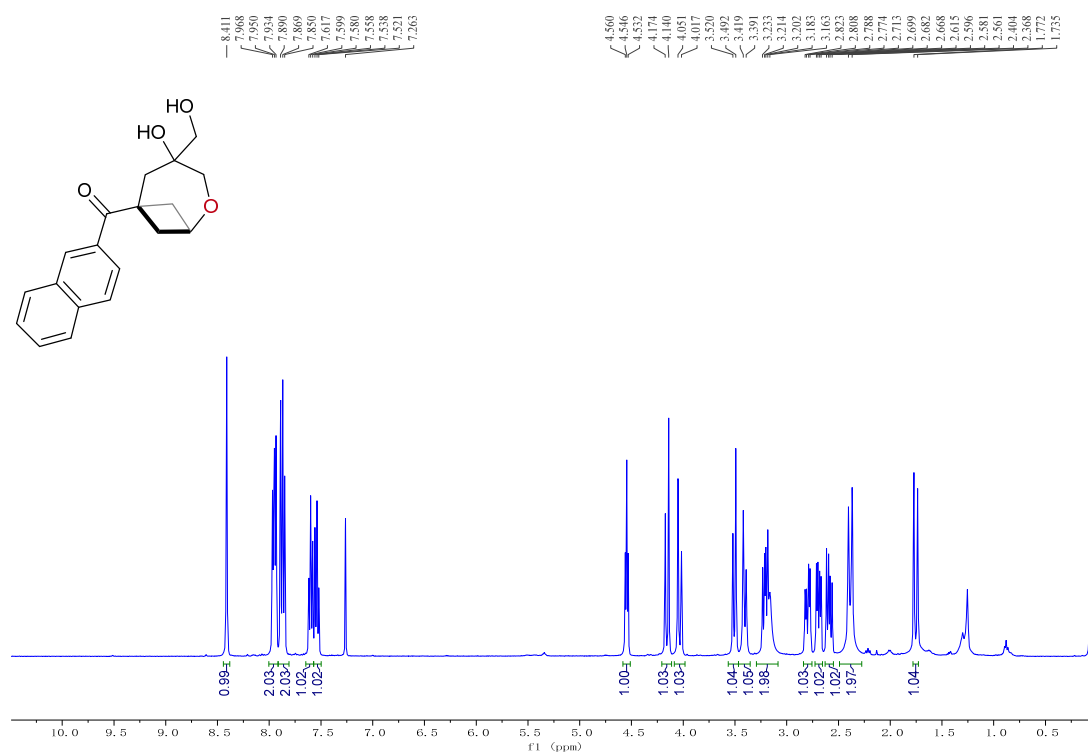

$^{13}\text{C}$  NMR (100 MHz,  $\text{CDCl}_3$ )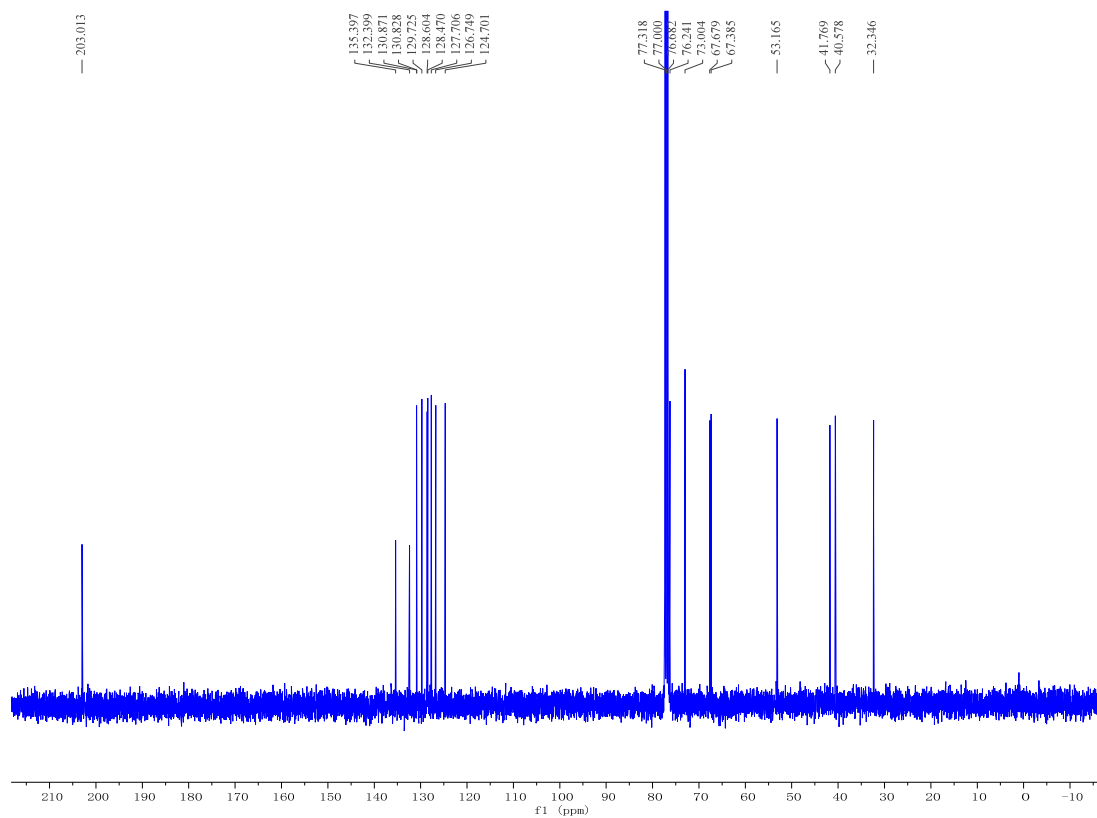 $^1\text{H}$  and  $^{13}\text{C}$  NMR Spectra for Compound 7 $^1\text{H}$  NMR (600 MHz,  $\text{CDCl}_3$ )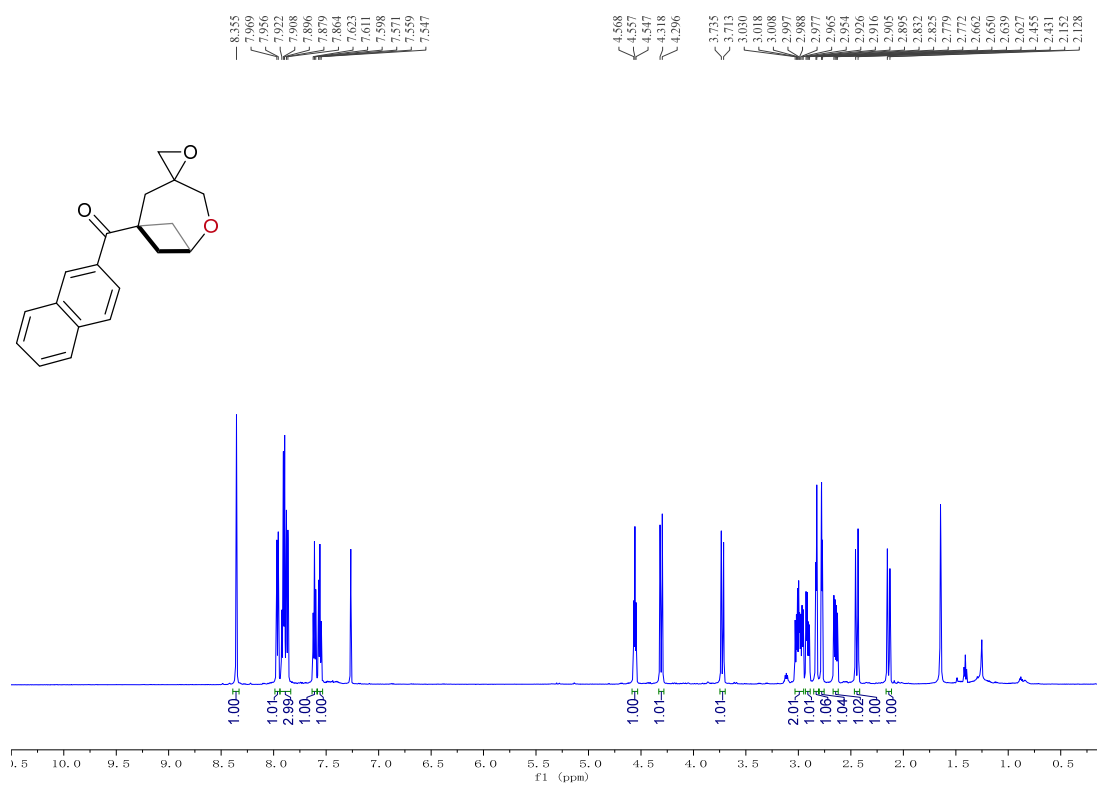

$^{13}\text{C}$  NMR (100 MHz,  $\text{CDCl}_3$ )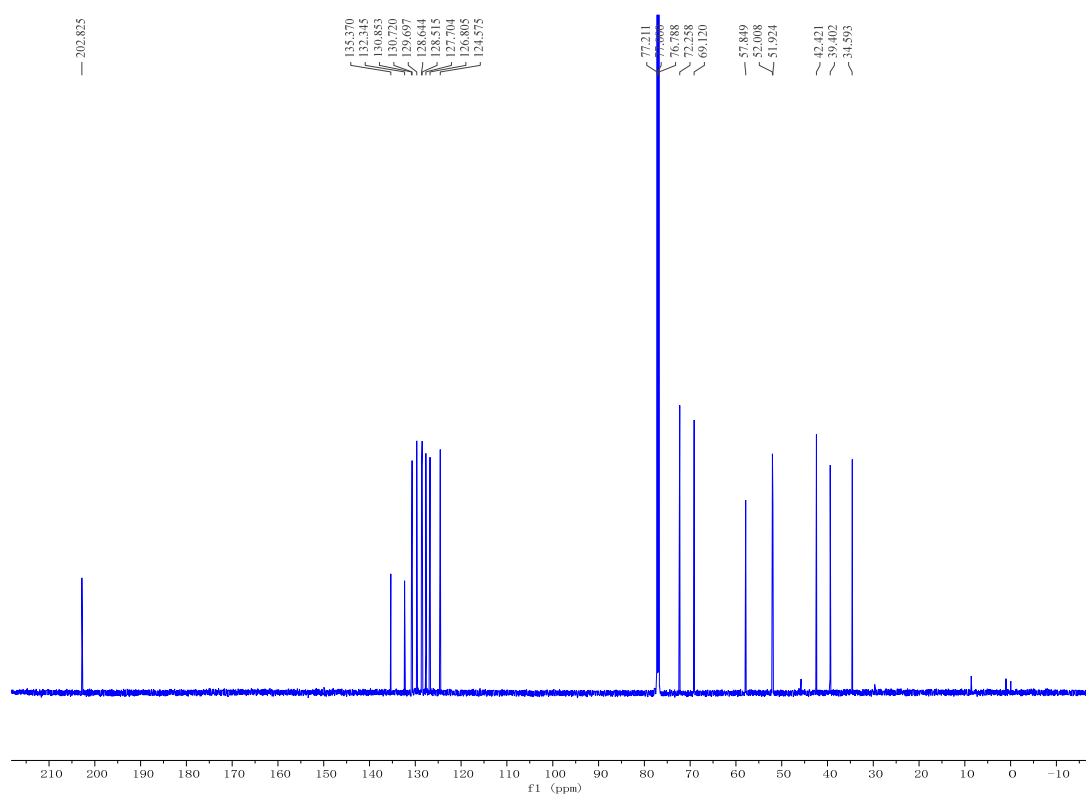 $^1\text{H}$  and  $^{13}\text{C}$  NMR Spectra for Compound 8 $^1\text{H}$  NMR (400 MHz,  $\text{CDCl}_3$ )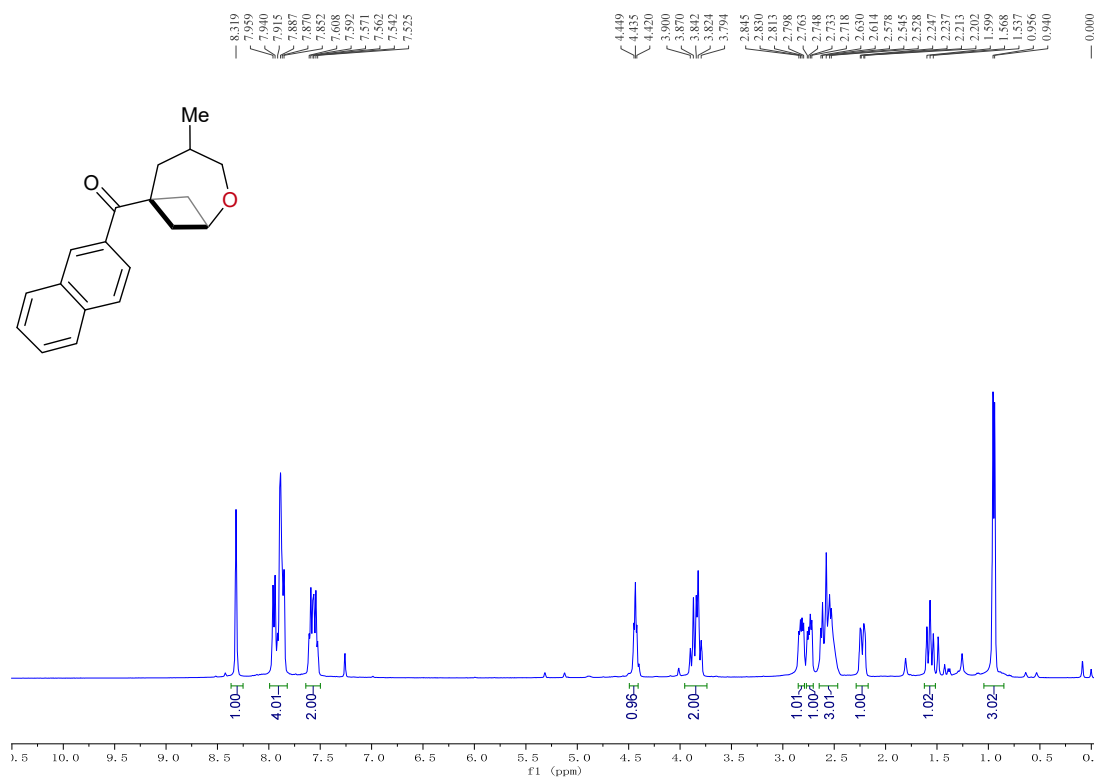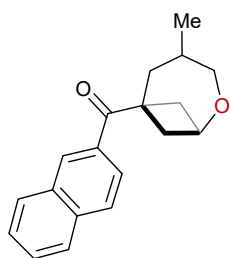

$^{13}\text{C}$  NMR (100 MHz,  $\text{CDCl}_3$ )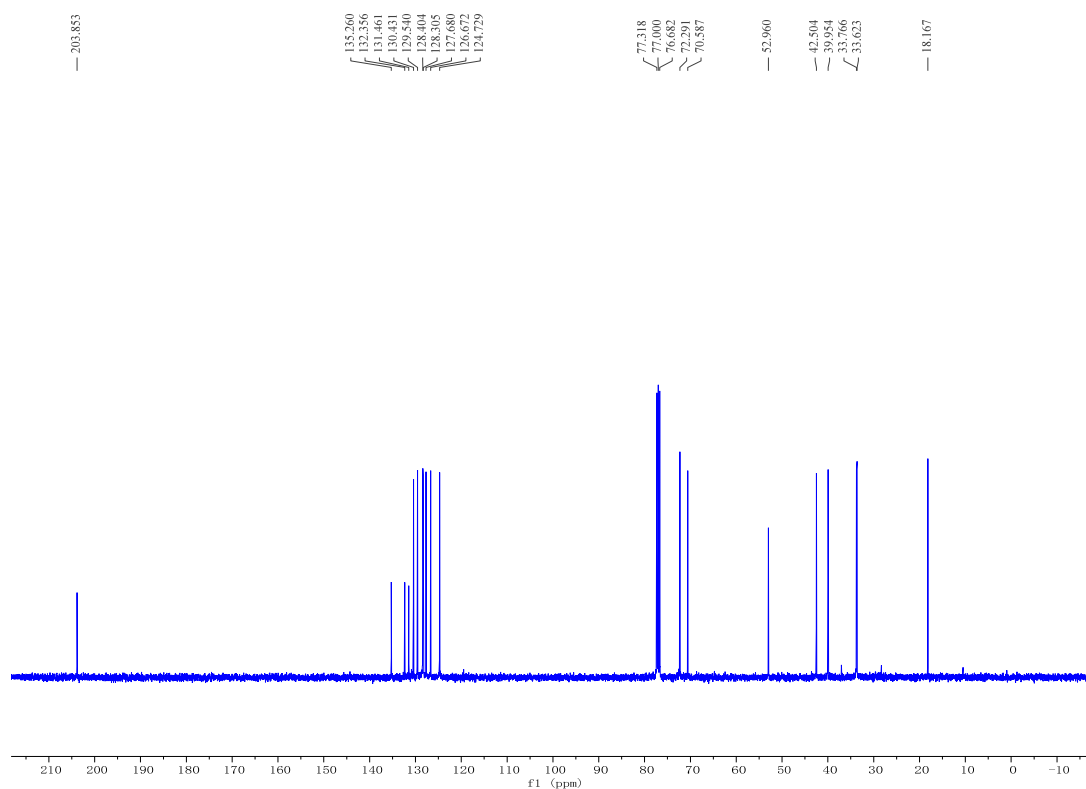 $^1\text{H}$  and  $^{13}\text{C}$  NMR Spectra for Compound 9 $^1\text{H}$  NMR (400 MHz,  $\text{CDCl}_3$ )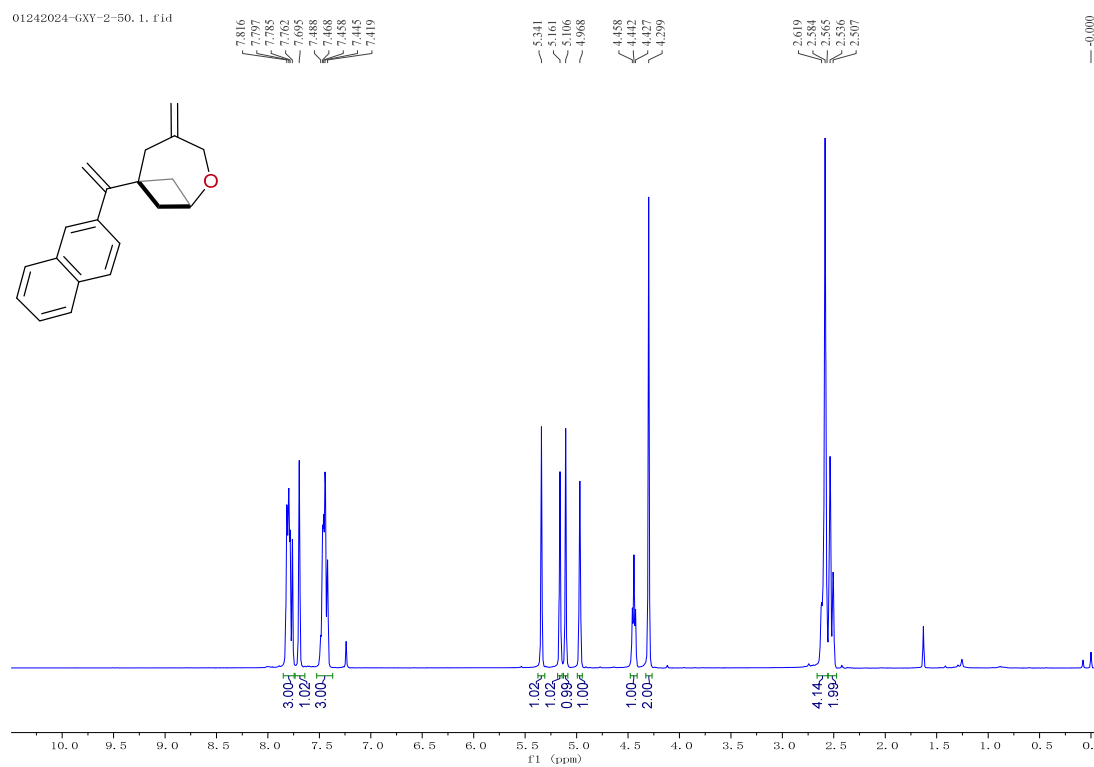



$^{13}\text{C}$  NMR (100 MHz,  $\text{CDCl}_3$ )

01242024-GXY-2-50, 2, f1d

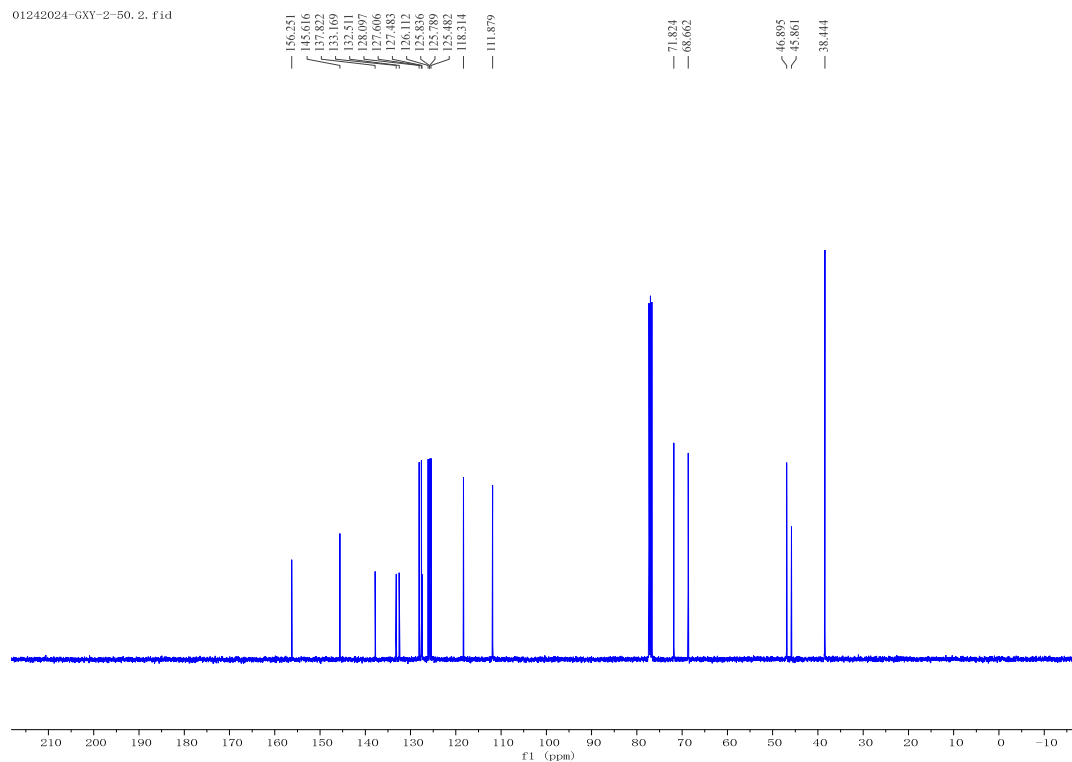 $^1\text{H}$  and  $^{13}\text{C}$  NMR Spectra for Compound 10 $^1\text{H}$  NMR (400 MHz,  $\text{CDCl}_3$ )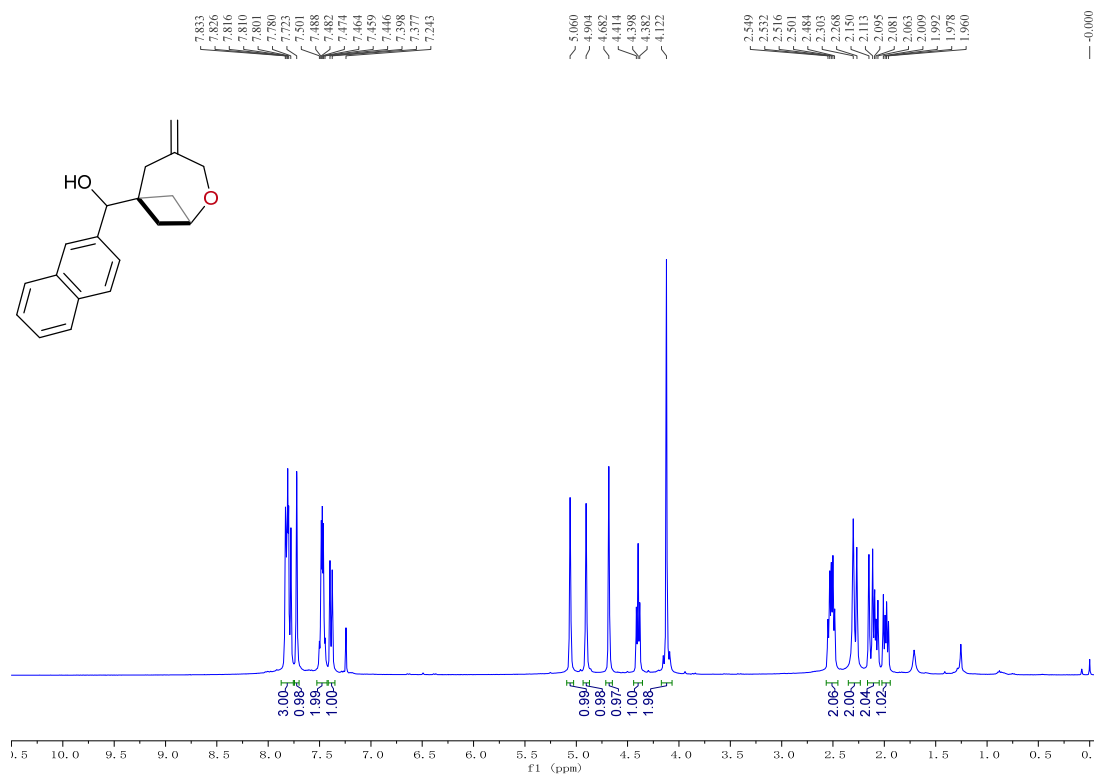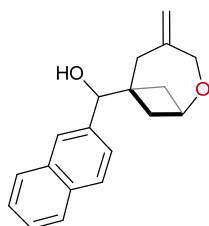

$^{13}\text{C}$  NMR (100 MHz,  $\text{CDCl}_3$ )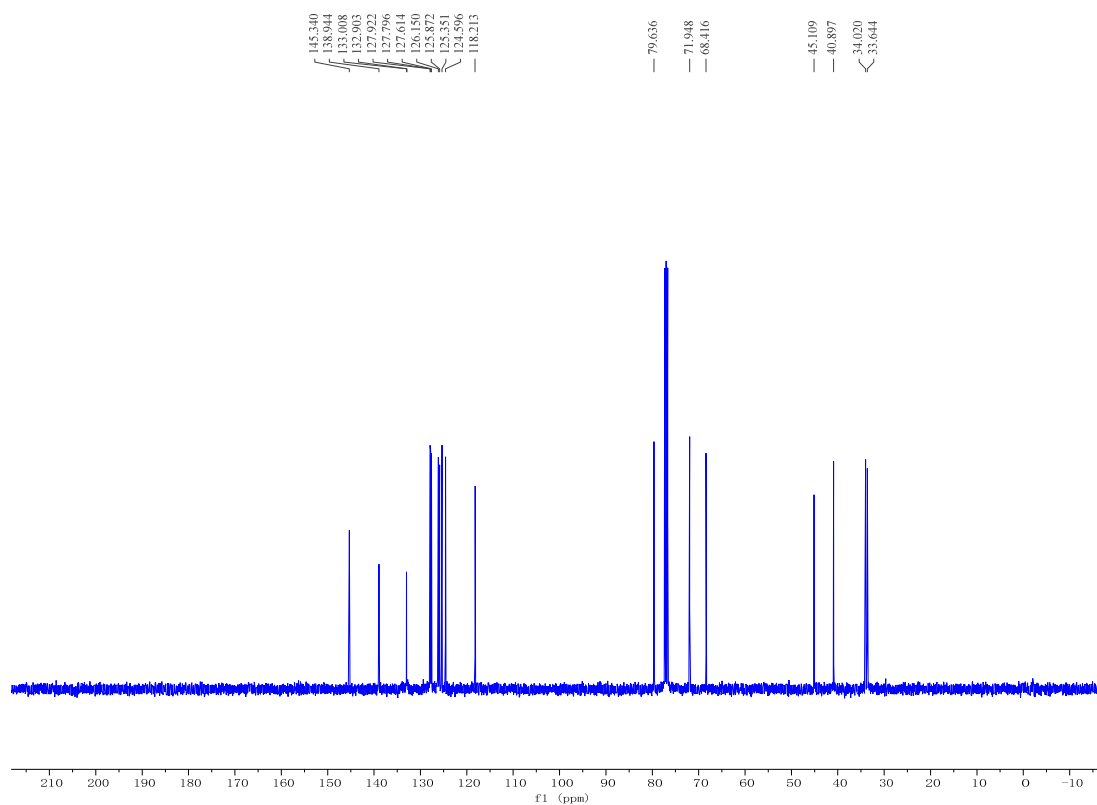 $^1\text{H}$  and  $^{13}\text{C}$  NMR Spectra for Compound 11 $^1\text{H}$  NMR (400 MHz,  $\text{CDCl}_3$ ) for the major isomer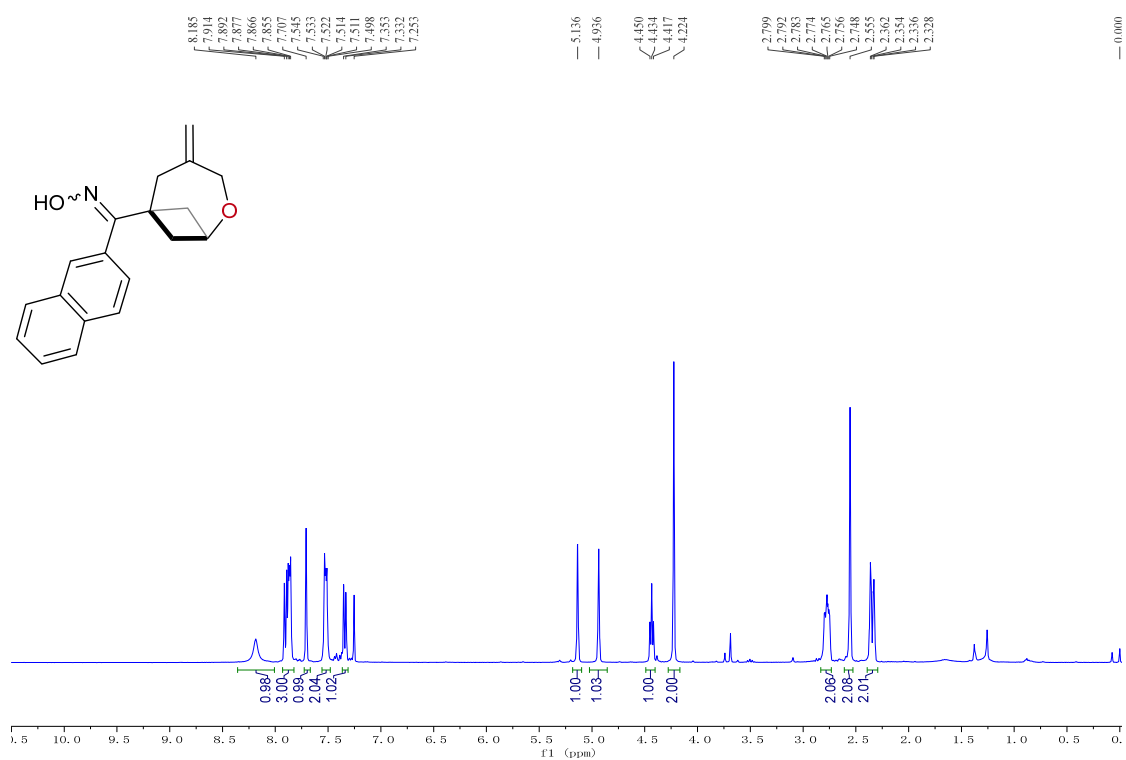

$^{13}\text{C}$  NMR (100 MHz,  $\text{CDCl}_3$ ) for the major isomer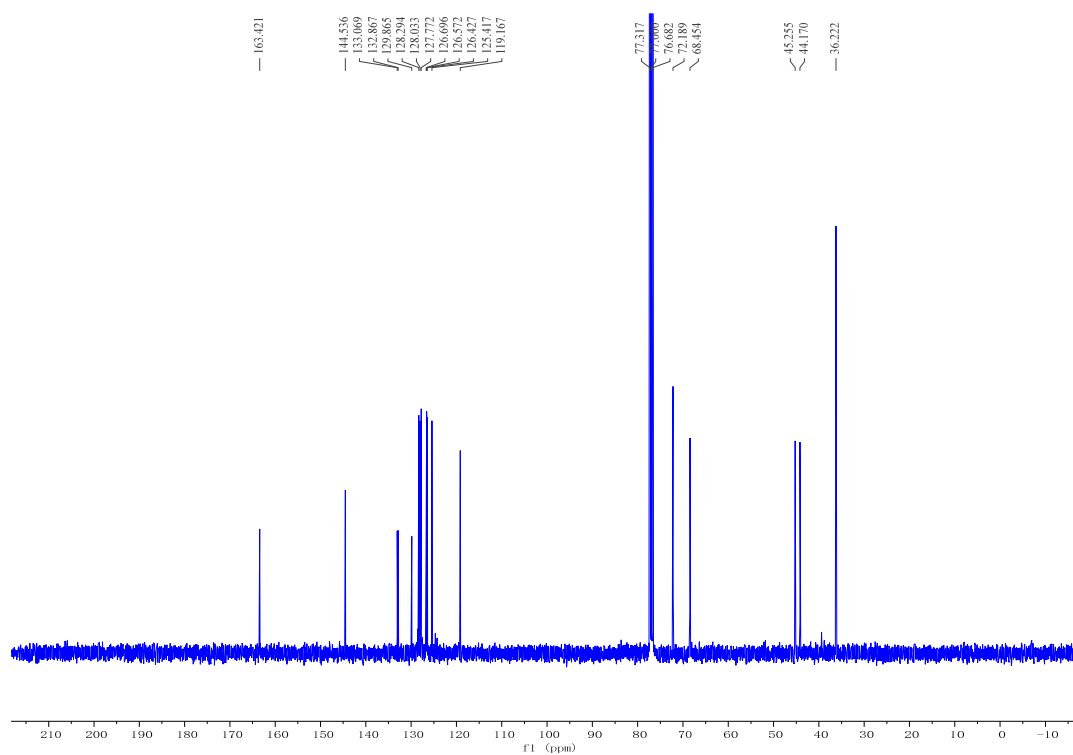 $^1\text{H}$  NMR (400 MHz,  $\text{CDCl}_3$ ) for the minor isomer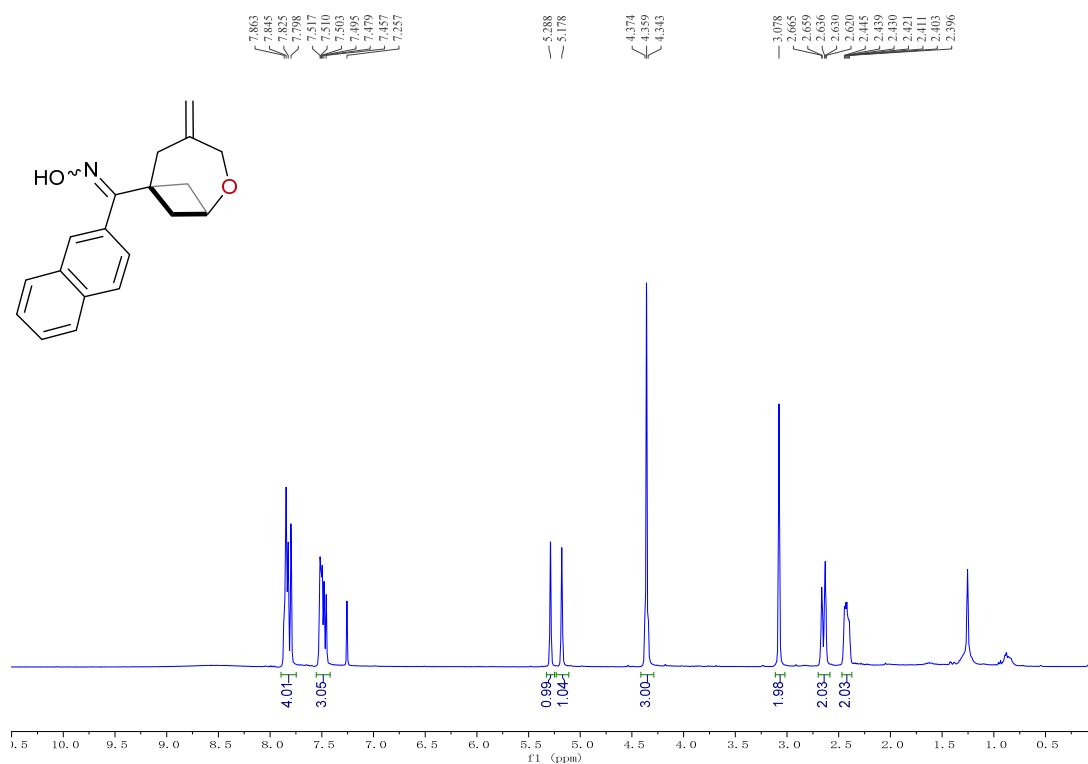

$^{13}\text{C}$  NMR (100 MHz,  $\text{CDCl}_3$ ) for the minor isomer

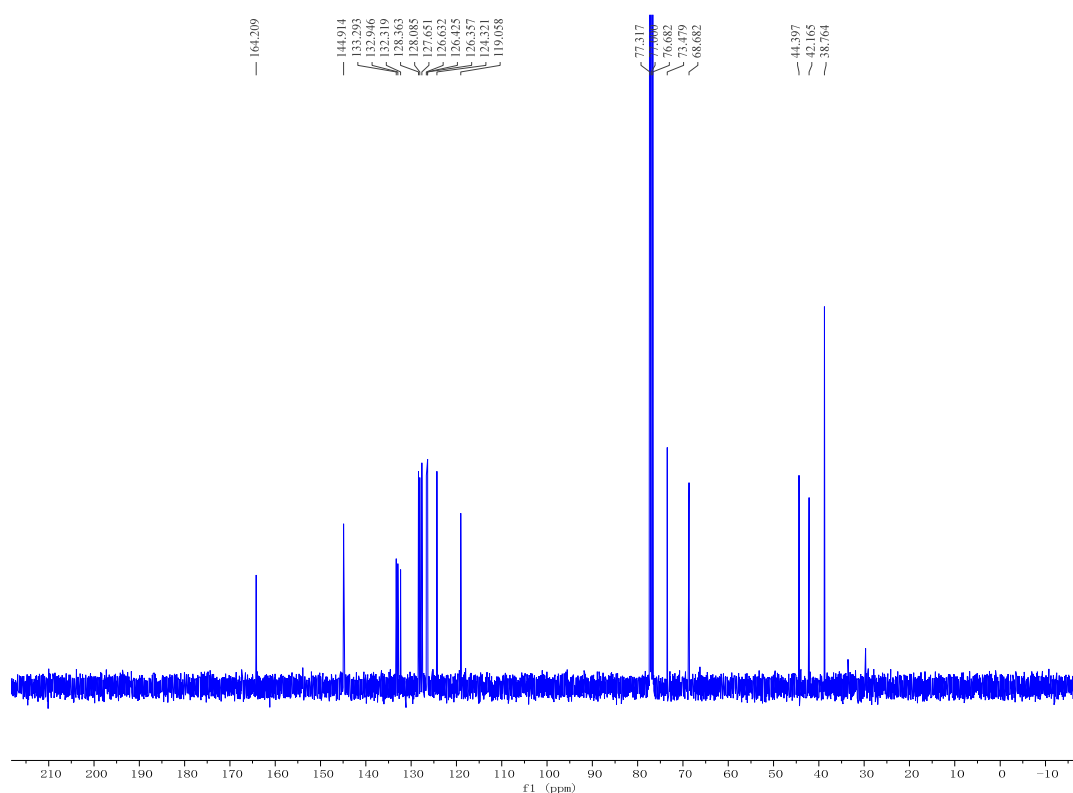

## 12 References

[1] (a) R. Guo, Y.-C. Chang, L. Herter, C. Salome, S. E. Braley, T. C. Fessard and M. K. Brown, Strain-Release  $[2\pi+2\sigma]$  Cycloadditions for the Synthesis of Bicyclo[2.1.1]hexanes Initiated by Energy Transfer. *J. Am. Chem. Soc.* **2022**, *144*, 7988–7994; (b) M. de Robichon, T. Kratz, F. Beyer, J. Zuber, C. Merten and T. Bach, Enantioselective, Intermolecular  $[\pi 2+\sigma 2]$  Photocycloaddition Reactions of 2(1H)-Quinolones and Bicyclo[1.1.0]butanes. *J. Am. Chem. Soc.* **2023**, *145*, 24466–24470; (c) D. Ni, S. Hu, X. Tan, Y. Yu, Z. Li and L. Deng, Intermolecular Formal Cycloaddition of Indoles with Bicyclo[1.1.0]butanes by Lewis Acid Catalysis. *Angew. Chem. Int. Ed.* **2023**, *62*, e202308606; (d) B. D. Schwartz, M. Y. Zhang, R. H. Attard, M. G. Gardiner and L. R. Malins, Structurally Diverse Acyl Bicyclobutanes: Valuable Strained Electrophiles. *Chem. Eur. J.* **2020**, *26*, 2808–2812.

[2] (a) H. Uno, K. Kawai, T. Araki, M. Shiro and N. Shibata, Enantio-, Diastereo- and Regioselective Synthesis of Chiral Cyclic and Acyclic *gem*-Difluoromethylenes by

Palladium-Catalyzed [4+2] Cycloaddition. *Angew. Chem. Int. Ed.*, **2022**, *61*, e202117635; (b) S.-S. Zhang, Y.-C. Zheng, Z.-W. Zhang, S.-Y. Chen, H. Xie, B. Shu, J.-L. Song, Y.-Z. Liu, Y.-F. Zeng and L. Zhang, Access to Branched Allylarenes via Rhodium(III)-Catalyzed C–H Allylation of (Hetero)arenes with 2-Methylidenetrimethylene Carbonate. *Org. Lett.*, **2021**, *23*, 5719–5723; (c) P.-H. Dou, S.-P. Yuan, Y. Chen, J.-Q. Zhao, Z.-H. Wang, Y. You, Y.-P. Zhang, M.-Q. Zhou and W.-C. Yuan, Dearomatization of 3-Nitroindoles Enabled Using Palladium-Catalyzed Decarboxylative [4 + 2] Cycloaddition of 2-Alkylidenetrimethylene Carbonates. *J. Org. Chem.*, **2022**, *87*, 6025–6037.

[3] L. Pitzer, F. Schäfers and F. Glorius, Rapid Assessment of the Reaction-Condition-Based Sensitivity of Chemical Transformations. *Angew. Chem. Int. Ed.*, **2019**, *58*, 8572–8576.
